# Supplementary material for: High-throughput single-cell functional elucidation of neurodevelopmental disease–associated genes reveals convergent mechanisms altering neuronal differentiation
Source: HighWire-hosted journal article supplement (doi:10.1101/gr.262295.120), 2020-09-01
Supplement: Supplemental_Table_S2.xlsx [file Supplemental_Table_S2.xlsx]

## Sheet: Legend
Table S2 Legend
Differentially expressed genes in each set of cells grouped by knock-down condition at the EARLY pseudotime stage.
Knockdown	Gene targeted for knockdown
Gene	Differentially expressed gene name
p_val	p value
avg_logFC	average log2 fold change
pct.1	percentage of cells in untargeted population expressing given gene
pct.2	percentage of cells in targeted population expressing given gene

## Sheet: Sup Table 2  Early DE
Knockdown	Gene	p_val	avg_logFC	pct.1	pct.2
ADNP	SNCG	3.56063e-08	0.256744	0.981	0.975
ADNP	Nontargeting-G3-gene	4.2202e-08	-0.179099	0	0.107
ADNP	KLHL35	6.12928e-06	0.174795	0.208	0.084
ADNP	C21orf59	7.7444e-06	0.311047	0.871	0.863
ADNP	NTF3	1.29965e-05	-0.241203	0.201	0.356
ADNP	SELM	4.80468e-05	0.348904	0.758	0.695
ADNP	KIAA1109	6.6998e-05	-0.170611	0.133	0.26
ADNP	CST3	0.000129033	0.298804	0.739	0.687
ADNP	LY6E	0.000223375	-0.159056	0.398	0.555
ADNP	GNG3	0.000223793	0.271181	0.735	0.684
ADNP	APH1A	0.00033423	-0.124249	0.163	0.293
ADNP	CCDC92	0.000399218	0.139185	0.292	0.173
ADNP	NREP	0.000407542	-0.171861	0.864	0.873
ADNP	GOLGA8A	0.000474173	0.109924	0.114	0.043
ADNP	GSTP1	0.000550558	0.169974	0.966	0.941
ADNP	PARL	0.000656028	-0.174759	0.254	0.366
ADNP	PCBP4	0.000755861	-0.158515	0.803	0.896
ADNP	PTGDS	0.000767292	0.460694	0.451	0.372
ADNP	GSE1	0.000873585	0.15381	0.227	0.127
ADNP	TNNI1	0.00089074	0.22929	0.318	0.216
ADNP	ATP11A	0.000918663	-0.118918	0.117	0.219
ADNP	CNTN2	0.00098176	0.169395	0.235	0.142
ADNP	GTF2F1	0.00101154	-0.145292	0.273	0.397
ADNP	SMDT1	0.00102254	0.167009	0.841	0.789
ADNP	CARD19	0.00113335	0.19693	0.674	0.59
ADNP	MRPS10	0.00119071	-0.161809	0.254	0.374
ADNP	MEG3	0.00128975	0.367807	0.443	0.359
ADNP	SDAD1	0.00133194	0.164225	0.439	0.331
ADNP	GLRX	0.0013437	0.136538	0.727	0.616
ADNP	BAG1	0.0013585	-0.163817	0.36	0.486
ADNP	NDUFA13	0.0015341	0.110609	0.977	0.964
ADNP	CLU	0.00160586	0.199736	0.367	0.272
ADNP	MTERF2	0.00161662	-0.101596	0.068	0.148
ADNP	CD163L1	0.00179544	-0.141221	0.311	0.44
ADNP	SLC35E3	0.00217484	-0.163386	0.129	0.221
ADNP	SRP14	0.00223872	0.101796	1	0.995
ADNP	EPHX1	0.00224111	0.132266	0.201	0.117
ADNP	SCPEP1	0.00233932	-0.118131	0.061	0.132
ADNP	POU2F2	0.00236008	0.223589	0.667	0.59
ADNP	PGRMC1	0.00263196	-0.143359	0.212	0.316
ADNP	CCDC137	0.00269055	-0.134644	0.178	0.282
ADNP	ATRX	0.00278011	-0.158469	0.614	0.707
ADNP	NCOA6	0.00290153	-0.10451	0.076	0.153
ADNP	TIMM17B	0.00300906	-0.102126	0.614	0.71
ADNP	CXXC5	0.00303141	-0.177731	0.515	0.606
ADNP	DCX	0.00307338	-0.188772	0.617	0.715
ADNP	HIGD2A	0.0032118	-0.12259	0.735	0.845
ADNP	DPYSL2	0.00339856	-0.158805	0.845	0.883
ADNP	CAMSAP2	0.00341058	-0.109987	0.08	0.158
ADNP	NDUFA4	0.00341283	0.114956	0.996	0.98
ADNP	BDP1	0.00343016	-0.191458	0.394	0.501
ADNP	ADGRG1	0.00365951	0.158178	0.269	0.183
ADNP	TSPAN13	0.00386516	0.119218	0.239	0.153
ADNP	PADI2	0.00402956	0.10506	0.159	0.087
ADNP	MFAP2	0.0040585	0.139351	0.212	0.13
ADNP	MTERF4	0.00421174	-0.101155	0.178	0.277
ADNP	BAALC	0.00448061	-0.104503	0.231	0.336
ADNP	SIX1	0.00450384	-0.107466	0.856	0.898
ADNP	MSI1	0.00465601	-0.175083	0.254	0.351
ADNP	C12orf75	0.0047235	-0.102628	0.076	0.148
ADNP	DR1	0.00474708	-0.11926	0.08	0.15
ADNP	PPP3CB	0.00483941	0.106138	0.136	0.071
ADNP	SYNRG	0.00485667	-0.156886	0.356	0.458
ADNP	SAMD14	0.00499388	-0.110715	0.117	0.201
ADNP	RAB21	0.0052399	-0.135058	0.095	0.168
ADNP	TRIM27	0.00526445	-0.114068	0.178	0.272
ADNP	DYNC1H1	0.00540748	0.126017	0.822	0.786
ADNP	GTF3A	0.00550958	-0.138935	0.481	0.583
ADNP	ETV1	0.00553668	-0.136736	0.682	0.784
ADNP	CTHRC1	0.00568843	-0.204351	0.402	0.504
ADNP	MLLT1	0.00611778	-0.102573	0.083	0.155
ADNP	ZNHIT3	0.00614615	0.1747	0.705	0.611
ADNP	NANS	0.00633311	-0.114252	0.277	0.382
ADNP	ELP3	0.00671207	0.112152	0.155	0.087
ADNP	WDR60	0.00671656	-0.121101	0.277	0.384
ADNP	RNF130	0.00687847	-0.14215	0.417	0.511
ADNP	NCL	0.00700699	-0.118159	0.795	0.837
ADNP	EIF3I	0.00705729	-0.15534	0.557	0.646
ADNP	SH3BP5L	0.00731314	-0.126732	0.091	0.16
ADNP	CNRIP1	0.00741599	-0.113604	0.189	0.282
ADNP	AFMID	0.00756144	-0.124358	0.133	0.216
ADNP	SNRPB	0.00756758	0.116557	0.799	0.761
ADNP	FAM222B	0.00806179	-0.103945	0.152	0.234
ADNP	CCNI	0.00810948	-0.158723	0.898	0.901
ADNP	CARM1	0.00819989	-0.111423	0.277	0.389
ADNP	SRP14-AS1	0.00838704	-0.109213	0.049	0.107
ADNP	TMEM230	0.00844906	-0.154838	0.39	0.468
ADNP	UBALD2	0.00853341	-0.104029	0.098	0.17
ADNP	GAP43	0.00875077	0.117742	0.973	0.969
ADNP	SRRM3	0.00896404	-0.131799	0.402	0.519
ADNP	KIAA0586	0.00903339	-0.1088	0.114	0.188
ADNP	CLASP2	0.00913605	0.105191	0.189	0.117
ADNP	TCEAL4	0.00929703	0.20098	0.614	0.529
ADNP	SMIM8	0.00945967	-0.107426	0.288	0.382
ADNP	EMX2	0.00966615	0.190146	0.811	0.758
ADNP	ZNF160	0.00977532	0.111838	0.235	0.155
ADNP	UPF2	0.0098435	0.103042	0.674	0.59
ADNP	MYO10	0.00992579	-0.100695	0.117	0.191
ADNP	NEMF	0.0101294	-0.134995	0.337	0.44
ADNP	NHLH1	0.0101498	0.127684	0.86	0.804
ADNP	MTCH1	0.0102638	-0.166625	0.489	0.578
ADNP	WDR18	0.0102645	-0.108645	0.22	0.313
ADNP	EZH2	0.0107621	-0.143417	0.314	0.397
ADNP	COX6C	0.0109434	0.12733	0.973	0.967
ADNP	MPV17	0.0110025	-0.104436	0.277	0.377
ADNP	KLHDC8B	0.0114069	-0.107195	0.163	0.244
ADNP	TOX4	0.0118646	-0.116302	0.333	0.435
ADNP	NDUFB3	0.0122057	0.118802	0.784	0.715
ADNP	PRRC2B	0.0122977	0.154505	0.489	0.422
ADNP	JUND	0.012536	0.162372	0.489	0.415
ADNP	EPS8L1	0.0125898	0.117523	0.758	0.672
ADNP	CHAMP1	0.0125974	-0.102344	0.08	0.142
ADNP	ARPC2	0.0128267	0.142894	0.83	0.779
ADNP	ZMAT2	0.0137692	-0.137798	0.5	0.585
ADNP	CYTH2	0.0140246	0.117668	0.489	0.384
ADNP	APP	0.0143313	-0.122087	0.549	0.634
ADNP	PTH2	0.0143728	-0.144808	0.292	0.374
ADNP	ARL16	0.0148891	-0.100168	0.803	0.875
ADNP	UNCX	0.0149579	0.111014	0.205	0.135
ADNP	NKAIN4	0.0149763	0.154254	0.667	0.611
ADNP	PEBP1	0.0149839	-0.100882	0.958	0.977
ADNP	NCAM1	0.0150291	0.176946	0.564	0.506
ADNP	SH3GLB1	0.0151028	0.168664	0.409	0.333
ADNP	MOSPD3	0.0151328	-0.129513	0.235	0.323
ADNP	PCBP3	0.0158038	-0.12191	0.265	0.356
ADNP	DPF2	0.0158351	0.143152	0.458	0.361
ADNP	STRAP	0.0158886	-0.124249	0.447	0.532
ADNP	SEC63	0.015899	0.155586	0.485	0.412
ADNP	PMEL	0.0161326	0.351653	0.367	0.318
ADNP	TOMM5	0.0163972	0.12109	0.189	0.122
ADNP	MYL12B	0.0165907	0.147121	0.731	0.718
ADNP	NDUFA1	0.0168178	0.118821	0.89	0.901
ADNP	C14orf119	0.0169044	-0.100656	0.348	0.448
ADNP	ZNF75A	0.0171974	-0.108437	0.102	0.165
ADNP	MTIF3	0.0172198	0.138736	0.625	0.567
ADNP	TRAPPC1	0.0173349	0.112059	0.883	0.858
ADNP	RBM8A	0.0180505	-0.108385	0.75	0.809
ADNP	CIZ1	0.0180822	-0.109533	0.182	0.262
ADNP	PSMC3	0.0184802	-0.138667	0.538	0.613
ADNP	VIMP	0.018619	0.12274	0.58	0.491
ADNP	VAX2	0.0193469	-0.114217	0.261	0.346
ADNP	NEFM	0.0197477	-0.150939	0.985	0.954
ADNP	ROBO1	0.020088	0.106992	0.193	0.13
ADNP	DNAJC18	0.0201033	-0.101191	0.133	0.201
ADNP	KIAA1191	0.0202284	-0.107781	0.22	0.298
ADNP	RAD54L2	0.0203714	0.102319	0.246	0.176
ADNP	NEFL	0.020417	-0.127252	0.837	0.855
ADNP	CGGBP1	0.0205625	-0.118069	0.205	0.288
ADNP	NES	0.0206833	-0.104596	0.261	0.354
ADNP	PPP1R15A	0.0210813	0.121326	0.303	0.229
ADNP	LIMD2	0.0213916	0.104104	0.682	0.621
ADNP	MACF1	0.0214835	0.123365	0.561	0.483
ADNP	CHD2	0.021511	-0.105896	0.25	0.328
ADNP	STMN4	0.021961	0.124166	0.731	0.725
ADNP	DCTN1	0.0219834	0.173033	0.667	0.623
ADNP	S100A6	0.0222696	0.114738	0.795	0.758
ADNP	IGFBP5	0.0224874	-0.212813	0.068	0.125
ADNP	MRPS12	0.0226989	-0.100135	0.439	0.545
ADNP	GREB1	0.0237255	0.102297	0.201	0.135
ADNP	MESDC1	0.0237467	0.114403	0.117	0.069
ADNP	HMGA1	0.0244585	-0.142612	0.674	0.735
ADNP	RCN1	0.0244589	0.109868	0.477	0.402
ADNP	POP7	0.0248831	-0.121147	0.39	0.489
ADNP	ARMC6	0.0249555	0.10524	0.174	0.117
ADNP	CCDC14	0.0251645	-0.103529	0.28	0.359
ADNP	ADAR	0.0258913	-0.113258	0.303	0.382
ADNP	CPNE3	0.0259859	0.138212	0.398	0.326
ADNP	IRX2	0.0261992	-0.131865	0.371	0.445
ADNP	CWC27	0.0263083	-0.130878	0.277	0.356
ADNP	PPP2R2A	0.02649	0.124021	0.364	0.285
ADNP	AP3M1	0.026903	0.118841	0.201	0.14
ADNP	ZSCAN9	0.0271087	-0.100344	0.102	0.16
ADNP	MRFAP1	0.0273183	-0.115117	0.451	0.562
ADNP	MAZ	0.0273678	-0.117226	0.246	0.331
ADNP	HIST3H2A	0.0278155	-0.138791	0.466	0.537
ADNP	FBL	0.0279769	-0.119853	0.402	0.499
ADNP	RAB4B	0.0281176	0.11286	0.189	0.132
ADNP	C19orf60	0.0283807	0.114794	0.591	0.532
ADNP	LSM4	0.028769	-0.114251	0.739	0.766
ADNP	SSBP4	0.0288126	0.116762	0.167	0.112
ADNP	CSNK1D	0.0288457	0.11598	0.341	0.27
ADNP	RNF41	0.029467	-0.122275	0.106	0.16
ADNP	EFNA5	0.0301174	0.186056	0.364	0.305
ADNP	CINP	0.0306205	0.1607	0.182	0.122
ADNP	TSPAN5	0.0307601	-0.101683	0.178	0.247
ADNP	GLTSCR2	0.0309157	-0.131321	0.504	0.588
ADNP	FBXL15	0.0313416	-0.128971	0.239	0.313
ADNP	DNAJC19	0.0315549	-0.131011	0.466	0.524
ADNP	EIF4H	0.0337555	-0.125988	0.322	0.397
ADNP	ZEB2	0.0347258	-0.104369	0.542	0.603
ADNP	ARHGAP35	0.034936	0.121167	0.364	0.295
ADNP	UBE2L6	0.0349594	-0.128241	0.61	0.687
ADNP	TBC1D16	0.035077	0.112734	0.33	0.257
ADNP	NEUROD4	0.0350964	-0.120832	0.504	0.598
ADNP	THSD7A	0.0355482	0.159953	0.428	0.372
ADNP	SARS	0.0355526	0.14011	0.678	0.674
ADNP	S100A13	0.0357145	0.13377	0.841	0.819
ADNP	DDX6	0.0371122	-0.121608	0.341	0.42
ADNP	GOLIM4	0.0374633	-0.103218	0.197	0.27
ADNP	THOC2	0.0377371	-0.128965	0.371	0.455
ADNP	GAL	0.0379223	0.111809	0.261	0.204
ADNP	SMARCD1	0.0381146	-0.105525	0.53	0.593
ADNP	C16orf91	0.0391904	0.104608	0.254	0.186
ADNP	NME4	0.0393631	-0.109248	0.583	0.687
ADNP	C1orf53	0.0394134	0.100445	0.356	0.288
ADNP	REPS1	0.0403353	0.101575	0.17	0.12
ADNP	PPP4R2	0.0403907	0.11878	0.511	0.453
ADNP	KIF19	0.0405163	0.141358	0.227	0.17
ADNP	PSMC1	0.04084	-0.105796	0.553	0.631
ADNP	NUMA1	0.04116	0.108517	0.345	0.27
ADNP	SEP15	0.0424721	-0.118561	0.424	0.494
ADNP	RP11-119B16.2	0.0433599	0.143175	0.201	0.145
ADNP	CSNK1E	0.0438037	-0.104171	0.519	0.608
ADNP	GPR155	0.0438567	0.132098	0.333	0.272
ADNP	DCXR	0.044627	0.171904	0.591	0.59
ADNP	CSTF3	0.0446516	0.114625	0.489	0.425
ADNP	FLAD1	0.0451149	0.115978	0.405	0.341
ADNP	SENP2	0.0456325	-0.103767	0.117	0.17
ADNP	CCNB1IP1	0.0456824	-0.10325	0.284	0.356
ADNP	FYN	0.0466632	0.134981	0.527	0.491
ADNP	EID1	0.0476841	0.106013	0.758	0.725
ADNP	PNISR	0.0495474	-0.122054	0.841	0.883
ADNP	APLP2	0.0500784	0.142476	0.485	0.438
ADNP	TUG1	0.0508963	0.101724	0.269	0.209
ADNP	SMIM7	0.0515566	-0.101744	0.292	0.356
ADNP	SREK1IP1	0.0522626	0.103986	0.708	0.667
ADNP	DHX9	0.0527176	0.114432	0.428	0.364
ADNP	TTC14	0.0531614	0.134958	0.413	0.356
ADNP	FKBP7	0.0539618	0.122352	0.284	0.232
ADNP	CYCS	0.0539727	-0.115066	0.723	0.789
ADNP	DPM3	0.0546121	0.117326	0.398	0.326
ADNP	UQCRC2	0.0546269	0.128971	0.473	0.43
ADNP	CENPF	0.0548806	-0.149286	0.121	0.176
ADNP	KCNQ1OT1	0.0558537	-0.16292	0.402	0.478
ADNP	FNBP4	0.0566715	-0.107371	0.25	0.313
ADNP	AASDHPPT	0.0568342	0.136343	0.473	0.425
ADNP	RP11-12G12.7	0.0582724	-0.122769	0.155	0.211
ADNP	MCFD2	0.058468	-0.105101	0.212	0.272
ADNP	PCMTD1	0.0584814	-0.106389	0.28	0.344
ADNP	SRSF11	0.0586916	-0.138002	0.769	0.814
ADNP	PTMS	0.0594117	-0.118252	0.784	0.842
ADNP	CEP350	0.060342	-0.100882	0.182	0.239
ADNP	HNRNPD	0.0645388	-0.10597	0.5	0.56
ADNP	FKBP2	0.0649374	0.126813	0.754	0.72
ADNP	TMEM160	0.0657198	-0.109739	0.394	0.478
ADNP	ST3GAL2	0.0658468	0.101799	0.383	0.323
ADNP	SNHG9	0.066601	-0.112776	0.258	0.321
ADNP	NFASC	0.0667014	0.117017	0.47	0.399
ADNP	POU3F4	0.067904	0.105215	0.212	0.16
ADNP	ACOT13	0.0683771	0.123862	0.386	0.346
ADNP	RIOK3	0.0703542	-0.113353	0.299	0.359
ADNP	REEP5	0.0706886	0.116135	0.379	0.331
ADNP	DBN1	0.0709297	0.112726	0.659	0.621
ADNP	SRRM2	0.0723871	-0.123903	0.689	0.761
ADNP	CCAR1	0.0744012	-0.115237	0.394	0.453
ADNP	CD63	0.0745259	0.136651	0.883	0.847
ADNP	GRINA	0.0764985	0.118312	0.64	0.606
ADNP	EIF2S2	0.0791333	-0.102193	0.826	0.87
ADNP	CALD1	0.080532	0.104124	0.727	0.687
ADNP	DCC	0.0808112	-0.119772	0.383	0.435
ADNP	TET1	0.0810497	0.126558	0.462	0.392
ADNP	EEF1A1	0.0811406	-0.107842	0.992	0.992
ADNP	PELI2	0.08202	0.125799	0.292	0.237
ADNP	BFAR	0.0822307	0.15202	0.28	0.232
ADNP	PIN4	0.0833081	0.101808	0.795	0.809
ADNP	ATP5H	0.0845233	0.101952	0.716	0.7
ADNP	RDX	0.0847596	-0.132031	0.67	0.697
ADNP	SSR1	0.0867839	0.107181	0.348	0.295
ADNP	DPCD	0.0873884	-0.100219	0.227	0.282
ADNP	MRPL55	0.0874254	0.109756	0.674	0.639
ADNP	USP8	0.0876306	0.157056	0.367	0.321
ADNP	TTC19	0.0911406	-0.107795	0.212	0.267
ADNP	LINC01420	0.091923	0.112537	0.818	0.786
ADNP	DST	0.0919549	0.122782	0.598	0.555
ADNP	DDX21	0.0920869	0.116738	0.633	0.601
ADNP	HNRNPM	0.0930547	-0.102801	0.663	0.733
ADNP	HACD3	0.0933419	0.134949	0.587	0.59
ADNP	DDT	0.0946421	0.132809	0.621	0.598
ADNP	RANBP1	0.0951697	-0.109188	0.731	0.784
ADNP	HSP90B1	0.0957534	0.115335	0.534	0.486
ADNP	PPP1R7	0.0961314	0.120923	0.409	0.361
ADNP	CNBP	0.101653	-0.10874	0.568	0.613
ADNP	C1orf122	0.101836	0.105292	0.773	0.705
ADNP	RNMT	0.102911	-0.107799	0.617	0.682
ADNP	ZC2HC1A	0.104494	0.11046	0.436	0.389
ADNP	IGDCC3	0.104944	-0.100738	0.527	0.588
ADNP	TALDO1	0.110132	0.106088	0.515	0.473
ADNP	AP2M1	0.110631	-0.12998	0.549	0.583
ADNP	TECR	0.112747	0.116014	0.576	0.565
ADNP	RP11-539L10.3	0.114581	0.125633	0.159	0.122
ADNP	IRF2BP2	0.115193	-0.110514	0.273	0.328
ADNP	PCNXL4	0.115512	0.100288	0.375	0.318
ADNP	RABAC1	0.115515	0.108189	0.67	0.634
ADNP	SELK	0.115785	0.125762	0.727	0.705
ADNP	SNAPC3	0.115954	0.109659	0.386	0.338
ADNP	WRB	0.116437	0.110329	0.42	0.372
ADNP	TRIM36	0.117357	0.113629	0.496	0.455
ADNP	SPATS2L	0.11744	0.113901	0.348	0.298
ADNP	RP11-792A8.4	0.11766	0.105943	0.227	0.186
ADNP	ZDHHC4	0.11947	0.100325	0.22	0.181
ADNP	VCAN	0.120135	0.12149	0.402	0.356
ADNP	PSMC4	0.121636	0.10005	0.481	0.44
ADNP	HLA-A	0.12429	0.189254	0.572	0.567
ADNP	PGD	0.126234	-0.103288	0.345	0.394
ADNP	TRMT6	0.127553	-0.115414	0.269	0.318
ADNP	TMEM59	0.127636	0.115964	0.652	0.613
ADNP	COX20	0.133439	0.123604	0.602	0.578
ADNP	PSMD13	0.134321	0.109735	0.352	0.318
ADNP	DNMT3A	0.134932	0.106932	0.303	0.254
ADNP	GADD45A	0.136576	-0.123258	0.568	0.611
ADNP	KMT5B	0.141912	0.111174	0.345	0.3
ADNP	NCBP2	0.14269	-0.100844	0.53	0.588
ADNP	ACAT2	0.145601	-0.103613	0.428	0.486
ADNP	SLC4A1AP	0.14718	-0.100666	0.167	0.209
ADNP	ORAI2	0.14933	-0.12662	0.432	0.463
ADNP	SUMO1	0.150123	-0.100508	0.67	0.705
ADNP	GLG1	0.155334	0.100606	0.341	0.308
ADNP	ARL6IP5	0.156087	0.121316	0.598	0.603
ADNP	TAOK1	0.157888	-0.107464	0.326	0.366
ADNP	CSNK1A1	0.164708	0.100303	0.625	0.631
ADNP	PRRT2	0.170363	0.104356	0.436	0.392
ADNP	CDK5	0.172141	0.100832	0.394	0.351
ADNP	MEF2C	0.174191	0.140777	0.561	0.547
ADNP	C18orf8	0.177471	0.134564	0.307	0.27
ADNP	VPS29	0.184084	0.100341	0.606	0.575
ADNP	PHGDH	0.192113	0.140548	0.364	0.328
ADNP	LAMTOR4	0.199373	0.112489	0.716	0.715
ADNP	PCMT1	0.200078	0.106916	0.515	0.486
ADNP	KLF7	0.200203	0.101704	0.398	0.356
ADNP	NIFK	0.202327	-0.104796	0.367	0.405
ADNP	DACH1	0.203832	0.109179	0.508	0.468
ADNP	SNRPC	0.208643	0.104412	0.795	0.756
ADNP	RP11-111M22.3	0.211192	0.100516	0.186	0.153
ADNP	UG0898H09	0.216505	0.105132	0.295	0.265
ADNP	SDR39U1	0.222323	0.103684	0.458	0.402
ADNP	SNHG19	0.231978	0.120364	0.386	0.346
ADNP	TAGLN2	0.248893	0.139202	0.341	0.321
ADNP	HSPB11	0.254674	0.107602	0.345	0.321
ADNP	CTXN1	0.268164	0.101694	0.295	0.272
ADNP	CRABP2	0.283156	-0.119226	0.216	0.244
ADNP	KNOP1	0.284413	0.105297	0.576	0.555
ADNP	RAB3GAP2	0.304605	0.11051	0.261	0.232
ADNP	PRKDC	0.337787	-0.104824	0.617	0.654
ADNP	HIST1H4C	0.36067	-0.21119	0.822	0.837
ADNP	IFI27L2	0.387837	0.102136	0.326	0.31
ADNP	ITM2C	0.399763	0.182776	0.621	0.628
ADNP	YIF1A	0.483568	0.102222	0.614	0.613
ADNP	NAA38	0.499715	0.10505	0.705	0.697
ADNP	PDIA3	0.514341	0.114489	0.451	0.45
ADNP	B2M	0.523806	0.116211	0.576	0.565
ADNP	TUBA1A	0.625688	0.103219	0.996	0.995
ADNP	XPC	0.648555	0.105256	0.307	0.295
ADNP	HSPB1	0.896245	0.118736	0.458	0.455
ADNP	CTNNB1	0.90802	0.1381	0.606	0.606
Knockdown	Gene	p_val	avg_logFC	pct.1	pct.2
ARID1B	PFDN4	7.96641e-09	-0.347828	0.616	0.791
ARID1B	MPST	1.36595e-08	-0.297226	0.276	0.511
ARID1B	SNX3	2.07251e-08	-0.330535	0.276	0.496
ARID1B	ATP5H	2.08436e-08	-0.239335	0.461	0.7
ARID1B	Nontargeting-G3-gene	2.64991e-07	-0.179099	0	0.107
ARID1B	MT-ND4	5.415e-07	0.190617	1	0.997
ARID1B	SLC25A6	4.41096e-06	0.207225	0.987	0.969
ARID1B	WDYHV1	5.82498e-06	0.106467	0.185	0.066
ARID1B	PGF	1.71469e-05	0.192521	0.315	0.163
ARID1B	NEFM	9.49658e-05	0.309888	0.966	0.954
ARID1B	GNB2L1	0.000106626	0.123211	0.996	0.995
ARID1B	MTRNR2L8	0.000139417	0.122319	0.129	0.046
ARID1B	DPYSL2	0.000147831	-0.215506	0.845	0.883
ARID1B	MT-ND5	0.000216451	0.189236	0.914	0.868
ARID1B	ZEB2	0.000278677	-0.214431	0.5	0.603
ARID1B	SRSF11	0.000280998	-0.22347	0.772	0.814
ARID1B	MIAT	0.00031178	-0.192291	0.746	0.809
ARID1B	FAU	0.000442705	0.118231	0.996	0.982
ARID1B	CTD-3064C13.1	0.000475824	0.110876	0.211	0.104
ARID1B	GADD45G	0.000538601	-0.304391	0.263	0.399
ARID1B	UBA52	0.000590461	0.134671	1	0.992
ARID1B	DSTYK	0.000634178	-0.190838	0.129	0.234
ARID1B	TCF3	0.000643061	-0.217519	0.263	0.374
ARID1B	STMN2	0.000686455	0.141991	0.996	0.972
ARID1B	NDUFB2	0.000806637	-0.145539	0.961	0.969
ARID1B	C11orf95	0.000879202	-0.170024	0.142	0.244
ARID1B	RSU1	0.000884594	0.134642	0.371	0.247
ARID1B	PMEL	0.000906716	0.135854	0.448	0.318
ARID1B	SOX5	0.000938848	-0.122659	0.065	0.153
ARID1B	EEF1B2	0.000945103	0.123462	0.966	0.944
ARID1B	MT-CO3	0.00096525	-0.117383	0.996	1
ARID1B	TSPAN13	0.000966589	0.129484	0.263	0.153
ARID1B	EIF4G1	0.000969791	-0.217747	0.25	0.361
ARID1B	ACSF3	0.000976699	-0.102762	0.043	0.122
ARID1B	CDC42SE1	0.000989931	0.14606	0.302	0.181
ARID1B	RAB4B	0.00105501	0.137331	0.237	0.132
ARID1B	CARM1	0.00113616	-0.20385	0.289	0.389
ARID1B	DVL3	0.00115219	-0.183547	0.203	0.31
ARID1B	IRAK1	0.00119615	-0.122062	0.052	0.132
ARID1B	RGS10	0.00127137	0.143753	0.957	0.967
ARID1B	AKAP9	0.00129752	-0.170692	0.832	0.86
ARID1B	BACE1	0.00131701	-0.119691	0.082	0.173
ARID1B	POLR2L	0.00140525	-0.131563	0.879	0.931
ARID1B	PPP1R17	0.00142262	-0.182773	0.802	0.858
ARID1B	C9orf16	0.00144219	-0.138671	0.978	0.985
ARID1B	PIN1	0.00151106	-0.145987	0.853	0.88
ARID1B	DDB1	0.00154858	-0.194317	0.254	0.351
ARID1B	USP22	0.00159047	-0.222556	0.582	0.649
ARID1B	AFAP1	0.00164135	-0.199618	0.414	0.501
ARID1B	SEC62	0.00191812	-0.165236	0.897	0.939
ARID1B	STK38	0.0019751	0.140337	0.25	0.15
ARID1B	PRMT9	0.0019916	-0.14572	0.086	0.17
ARID1B	ARL16	0.00201582	-0.1382	0.819	0.875
ARID1B	EIF3H	0.00209148	0.155791	0.806	0.687
ARID1B	NLRP1	0.00257841	-0.129459	0.103	0.191
ARID1B	EEF1A1	0.00267436	0.195497	1	0.992
ARID1B	ANKRD13D	0.00288635	-0.131733	0.168	0.272
ARID1B	ALG5	0.00319483	-0.154837	0.28	0.379
ARID1B	APBB1	0.00322461	-0.128416	0.237	0.338
ARID1B	GTF2I	0.00332969	-0.135771	0.724	0.774
ARID1B	BTBD7	0.00350211	-0.145243	0.121	0.209
ARID1B	VAT1	0.00361376	-0.171909	0.513	0.611
ARID1B	CLEC4G	0.0036495	-0.104344	0.091	0.178
ARID1B	COX7C	0.0039279	0.123027	0.996	0.99
ARID1B	FBXL17	0.0041107	-0.105829	0.052	0.12
ARID1B	PPP1R1C	0.00411973	0.12038	0.216	0.127
ARID1B	RAB21	0.0041927	-0.147808	0.091	0.168
ARID1B	ARID4B	0.00425434	-0.164315	0.556	0.634
ARID1B	ACO1	0.00431384	-0.100554	0.043	0.107
ARID1B	EPB41L4A-AS1	0.00442262	0.132067	0.586	0.471
ARID1B	SEPT9	0.00443618	-0.15658	0.388	0.476
ARID1B	ZFAS1	0.00447818	0.122395	0.909	0.931
ARID1B	SH3BP5L	0.00459376	-0.157639	0.086	0.16
ARID1B	HSPE1	0.00463917	-0.124326	0.909	0.952
ARID1B	C15orf59-AS1	0.00482325	0.106921	0.237	0.142
ARID1B	RBM3	0.00514953	0.133752	0.534	0.41
ARID1B	MRPL50	0.00516867	-0.161222	0.409	0.489
ARID1B	DNPH1	0.00517077	0.109572	0.513	0.382
ARID1B	SRA1	0.00518539	-0.174519	0.422	0.506
ARID1B	ARID1A	0.005218	-0.153929	0.431	0.517
ARID1B	VPS13C	0.00539276	-0.143418	0.138	0.221
ARID1B	ELAVL3	0.00551054	-0.126007	0.879	0.908
ARID1B	KBTBD6	0.00572127	-0.109245	0.052	0.117
ARID1B	EIF3J	0.00595875	-0.141454	0.69	0.753
ARID1B	PNISR	0.00617095	-0.150426	0.858	0.883
ARID1B	ZBTB10	0.00642655	-0.150755	0.164	0.242
ARID1B	SAP18	0.00660123	-0.15231	0.884	0.908
ARID1B	EAF1	0.00660529	-0.106182	0.047	0.109
ARID1B	SLIRP	0.00661984	-0.149096	0.987	0.995
ARID1B	BDP1	0.00666547	-0.198815	0.427	0.501
ARID1B	TIMP2	0.0067888	-0.164357	0.397	0.486
ARID1B	MAP4K4	0.00713507	-0.161049	0.625	0.674
ARID1B	NKAIN4	0.00716582	-0.143944	0.539	0.611
ARID1B	KMT2A	0.00728191	-0.172328	0.526	0.58
ARID1B	NAP1L1	0.00744394	0.129975	0.957	0.954
ARID1B	C14orf1	0.00765871	0.112164	0.444	0.326
ARID1B	SAMD1	0.00776613	-0.132395	0.103	0.178
ARID1B	ZNF397	0.00777479	0.104573	0.246	0.155
ARID1B	ME2	0.00783662	0.102724	0.216	0.132
ARID1B	GTF3C4	0.00790162	-0.111757	0.06	0.125
ARID1B	PMPCA	0.00817874	-0.179256	0.211	0.29
ARID1B	GABRB3	0.00842803	-0.153209	0.194	0.275
ARID1B	SCRN1	0.00846592	-0.135887	0.125	0.204
ARID1B	RNF7	0.00846971	-0.11635	0.828	0.863
ARID1B	SYCE1L	0.00854299	0.106169	0.224	0.137
ARID1B	CLU	0.00864675	0.10605	0.371	0.272
ARID1B	CSNK1E	0.00880558	-0.160226	0.578	0.608
ARID1B	PUF60	0.00882935	-0.175311	0.392	0.466
ARID1B	FUS	0.00898789	-0.143846	0.703	0.74
ARID1B	IVD	0.00899443	-0.118181	0.078	0.142
ARID1B	TMEM208	0.00924739	-0.193276	0.431	0.496
ARID1B	UBQLN1	0.00953348	-0.171685	0.397	0.458
ARID1B	MRPS12	0.00976349	-0.126128	0.461	0.545
ARID1B	TIMM17B	0.00986794	-0.13656	0.69	0.71
ARID1B	NCOR2	0.00998175	0.100212	0.155	0.087
ARID1B	CPNE3	0.0100459	0.117394	0.448	0.326
ARID1B	RP11-410L14.2	0.0101567	-0.14863	0.138	0.214
ARID1B	MLLT1	0.0101822	-0.111314	0.086	0.155
ARID1B	BAG1	0.0103862	-0.180666	0.414	0.486
ARID1B	TMEM261	0.0107474	0.108468	0.634	0.527
ARID1B	REEP2	0.0111278	-0.146058	0.207	0.282
ARID1B	CAMK2B	0.0113541	-0.155639	0.19	0.262
ARID1B	CD24	0.0114035	-0.137566	0.888	0.888
ARID1B	GDF11	0.0114311	-0.141694	0.457	0.562
ARID1B	SPG21	0.0120281	0.12974	0.371	0.288
ARID1B	GNAS	0.0124508	-0.133818	0.802	0.847
ARID1B	MAPK1IP1L	0.0124829	-0.161303	0.267	0.336
ARID1B	HNRNPA1	0.0125502	0.161708	0.901	0.875
ARID1B	ETFB	0.0127347	0.105155	0.625	0.517
ARID1B	CTC-459F4.3	0.0129062	-0.138813	0.108	0.173
ARID1B	RTF1	0.0129263	-0.106033	0.897	0.911
ARID1B	PPP1R12A	0.0130863	-0.123384	0.31	0.397
ARID1B	CAMTA1	0.0134032	-0.160614	0.698	0.728
ARID1B	DGKZ	0.0134107	-0.129762	0.134	0.206
ARID1B	YIPF4	0.0135493	-0.174469	0.388	0.463
ARID1B	NAV1	0.0135574	-0.149556	0.595	0.651
ARID1B	SLC25A5	0.013603	0.119859	0.694	0.641
ARID1B	ATG4D	0.0137869	-0.12125	0.134	0.209
ARID1B	SMARCA4	0.013794	-0.124985	0.78	0.802
ARID1B	HKR1	0.0139601	-0.119547	0.052	0.107
ARID1B	ILF3	0.0142621	-0.150382	0.578	0.639
ARID1B	MT-ND2	0.0142987	0.137398	0.991	0.995
ARID1B	LINC01033	0.0143977	0.108864	0.159	0.094
ARID1B	XKR7	0.0144442	-0.110501	0.25	0.333
ARID1B	SSBP2	0.0145345	-0.193386	0.246	0.305
ARID1B	EPB41	0.0146152	-0.142997	0.513	0.59
ARID1B	CNPY2	0.0146619	-0.125933	0.815	0.86
ARID1B	MCL1	0.0148488	-0.140784	0.185	0.262
ARID1B	R3HDM1	0.014902	0.116313	0.228	0.153
ARID1B	CTC-378H22.2	0.015158	-0.143466	0.272	0.359
ARID1B	UQCR10	0.0153217	-0.116359	0.987	0.987
ARID1B	SNRPN	0.0154217	-0.114214	0.78	0.832
ARID1B	ATF6	0.0157364	-0.130704	0.181	0.252
ARID1B	VAV2	0.015941	-0.10269	0.134	0.206
ARID1B	ING4	0.016048	-0.156119	0.353	0.425
ARID1B	TTC14	0.0160508	0.110698	0.461	0.356
ARID1B	ACTC1	0.0163607	-0.136418	0.241	0.331
ARID1B	TMEM97	0.0165589	0.125196	0.565	0.468
ARID1B	WDR60	0.0165651	-0.158114	0.315	0.384
ARID1B	BMS1	0.0166825	0.103543	0.233	0.158
ARID1B	SSR4	0.0172631	0.102605	0.901	0.863
ARID1B	COMMD6	0.0174468	0.105468	0.961	0.941
ARID1B	NR2F1	0.0174609	0.129458	0.435	0.336
ARID1B	SPON2	0.017861	-0.168617	0.392	0.468
ARID1B	CCDC12	0.0179648	-0.15316	0.431	0.489
ARID1B	PLTP	0.018135	-0.121458	0.164	0.234
ARID1B	ABRACL	0.0187584	0.10117	0.647	0.57
ARID1B	APC	0.0190788	-0.134807	0.44	0.494
ARID1B	ZDHHC12	0.0191643	0.101734	0.194	0.127
ARID1B	DCAF7	0.019333	-0.134113	0.392	0.481
ARID1B	SUZ12	0.0194433	-0.105505	0.129	0.198
ARID1B	PPP2R5E	0.0196692	-0.11153	0.259	0.344
ARID1B	ETHE1	0.0200069	0.105819	0.284	0.206
ARID1B	NGDN	0.0202534	-0.148065	0.254	0.331
ARID1B	NRP2	0.0208717	-0.139501	0.25	0.326
ARID1B	KIAA0232	0.0208937	-0.139756	0.19	0.26
ARID1B	SF3B5	0.0210337	-0.115143	0.754	0.774
ARID1B	PTPRF	0.0211842	-0.128095	0.444	0.509
ARID1B	BAZ1B	0.0214477	-0.123709	0.418	0.494
ARID1B	ZADH2	0.0214895	-0.102852	0.073	0.13
ARID1B	RAPGEF5	0.0217664	-0.168154	0.328	0.397
ARID1B	TRA2B	0.021768	-0.110837	0.586	0.651
ARID1B	ELOF1	0.022007	-0.127884	0.474	0.529
ARID1B	HNRNPU	0.0222014	-0.14349	0.621	0.674
ARID1B	EXOC1	0.0224922	0.1036	0.414	0.316
ARID1B	VPS25	0.0227267	-0.123402	0.397	0.471
ARID1B	PHACTR4	0.022794	-0.133252	0.237	0.316
ARID1B	MDFI	0.0234791	-0.145717	0.272	0.341
ARID1B	CKB	0.0235754	0.111955	0.991	0.972
ARID1B	SNHG9	0.0236258	-0.124174	0.246	0.321
ARID1B	GNG3	0.0238198	0.148068	0.78	0.684
ARID1B	RUNX1T1	0.0238521	-0.165809	0.621	0.654
ARID1B	LY6E	0.0247052	-0.171984	0.5	0.555
ARID1B	SYP	0.0250913	-0.130909	0.677	0.705
ARID1B	LDHB	0.0256272	0.110192	0.914	0.893
ARID1B	MAX	0.0256981	-0.113678	0.293	0.364
ARID1B	LYPLA1	0.0259913	0.137904	0.478	0.382
ARID1B	IMMP1L	0.0260582	-0.123483	0.496	0.578
ARID1B	DECR1	0.0263132	-0.120508	0.241	0.318
ARID1B	N4BP2L2	0.0266086	-0.151186	0.616	0.641
ARID1B	TCEAL4	0.0266956	0.145048	0.621	0.529
ARID1B	MRPL22	0.0267233	-0.185178	0.56	0.593
ARID1B	PHGDH	0.0268157	0.147165	0.418	0.328
ARID1B	RBM10	0.0268573	-0.111694	0.194	0.265
ARID1B	MPHOSPH10	0.0272482	-0.139651	0.379	0.458
ARID1B	GNG2	0.027403	0.110219	0.427	0.328
ARID1B	SSTR2	0.0276571	-0.238305	0.341	0.407
ARID1B	RBFOX3	0.0276886	-0.140659	0.198	0.265
ARID1B	RBM6	0.0277112	-0.135315	0.483	0.517
ARID1B	PCM1	0.0279369	-0.138352	0.668	0.697
ARID1B	SRSF5	0.0281363	-0.116846	0.698	0.746
ARID1B	RNPS1	0.0282502	-0.127964	0.629	0.656
ARID1B	RBM48	0.0282673	-0.107568	0.116	0.176
ARID1B	ERGIC3	0.0283905	0.127127	0.642	0.565
ARID1B	UBA3	0.0287604	-0.105725	0.112	0.17
ARID1B	NBEAL1	0.0288125	0.134334	0.573	0.496
ARID1B	TUBB2B	0.0292753	0.142548	0.953	0.944
ARID1B	LSM7	0.0295791	-0.1135	0.94	0.944
ARID1B	SNW1	0.0296559	-0.188786	0.47	0.506
ARID1B	ARL6IP5	0.0301839	-0.137351	0.582	0.603
ARID1B	ALCAM	0.0305119	0.121449	0.129	0.076
ARID1B	RERE	0.0306367	-0.103096	0.806	0.819
ARID1B	FAM127A	0.0307444	-0.134553	0.754	0.789
ARID1B	ADAR	0.0307509	-0.157326	0.323	0.382
ARID1B	TIMM50	0.0308453	-0.177264	0.431	0.491
ARID1B	WDR83OS	0.0309461	-0.101824	0.901	0.911
ARID1B	TIMM17A	0.0310849	-0.152224	0.547	0.601
ARID1B	SYT1	0.0310892	-0.102618	0.922	0.931
ARID1B	APTX	0.0311535	0.104125	0.237	0.17
ARID1B	GLRX3	0.0315875	-0.156655	0.418	0.476
ARID1B	CCDC14	0.0316332	-0.140343	0.297	0.359
ARID1B	RGS12	0.0319035	-0.114385	0.194	0.262
ARID1B	FUBP1	0.0323276	-0.152506	0.409	0.45
ARID1B	HSBP1	0.0323586	0.122072	0.905	0.865
ARID1B	AKIRIN2	0.0323622	-0.152107	0.246	0.308
ARID1B	RND2	0.0326077	-0.12784	0.487	0.529
ARID1B	ATP5A1	0.0330987	0.109608	0.806	0.756
ARID1B	ADAL	0.0333678	-0.138448	0.246	0.305
ARID1B	COX11	0.0334364	-0.133417	0.272	0.333
ARID1B	PSMC3	0.0335006	-0.149148	0.586	0.613
ARID1B	LSM5	0.0340345	-0.128446	0.724	0.763
ARID1B	EAPP	0.0340539	-0.146199	0.44	0.499
ARID1B	ZNHIT6	0.0343723	0.104074	0.263	0.193
ARID1B	UG0898H09	0.0345386	0.110646	0.341	0.265
ARID1B	TARSL2	0.03473	-0.14287	0.22	0.282
ARID1B	PDE6D	0.0348357	-0.127587	0.267	0.333
ARID1B	POLR2A	0.0352756	-0.175409	0.427	0.481
ARID1B	GOLGB1	0.0353803	-0.172972	0.491	0.527
ARID1B	STOML2	0.0360551	0.125052	0.621	0.527
ARID1B	MRFAP1	0.0370089	-0.149063	0.517	0.562
ARID1B	SLC4A1AP	0.037388	-0.15906	0.151	0.209
ARID1B	PTS	0.0373968	-0.142271	0.444	0.494
ARID1B	PPCS	0.0377576	-0.117959	0.147	0.204
ARID1B	CENPF	0.0377596	-0.178638	0.121	0.176
ARID1B	CWC15	0.0379767	-0.126832	0.621	0.621
ARID1B	FAM96B	0.0382667	-0.118094	0.909	0.906
ARID1B	GPRIN3	0.0383707	-0.118325	0.759	0.771
ARID1B	PTBP1	0.0390808	-0.100103	0.254	0.321
ARID1B	DCTN6	0.0391989	-0.113392	0.474	0.509
ARID1B	LRWD1	0.0399704	-0.116478	0.125	0.178
ARID1B	CITED2	0.0402191	-0.108104	0.138	0.201
ARID1B	SERP2	0.0403106	0.11215	0.384	0.293
ARID1B	SMIM7	0.0406184	-0.144341	0.297	0.356
ARID1B	FDX1	0.0411612	0.110496	0.259	0.193
ARID1B	HSD11B1L	0.0414944	-0.10164	0.375	0.438
ARID1B	RP11-127B20.3	0.0416148	-0.107169	0.073	0.122
ARID1B	HNRNPAB	0.0418741	-0.127369	0.552	0.601
ARID1B	MTHFD2	0.04219	0.13107	0.401	0.321
ARID1B	C14orf132	0.0428426	-0.122143	0.763	0.786
ARID1B	DHX40	0.0428651	-0.117865	0.246	0.313
ARID1B	WDR61	0.0430394	-0.115141	0.237	0.29
ARID1B	RIF1	0.0436096	-0.112591	0.151	0.209
ARID1B	ASNA1	0.0437383	-0.126384	0.384	0.448
ARID1B	NOVA2	0.044038	-0.122376	0.216	0.277
ARID1B	ZMAT5	0.0445628	-0.131506	0.306	0.372
ARID1B	LANCL2	0.0448511	-0.104925	0.168	0.232
ARID1B	ANP32A	0.0448574	-0.153567	0.578	0.603
ARID1B	RSF1	0.0451697	-0.155137	0.797	0.802
ARID1B	SF1	0.0457056	-0.130005	0.513	0.555
ARID1B	FAM110A	0.0457436	-0.14549	0.345	0.397
ARID1B	ZNF24	0.0460641	-0.127311	0.276	0.331
ARID1B	LSM1	0.0460942	-0.124276	0.582	0.618
ARID1B	HNRNPK	0.0466666	-0.105146	0.793	0.858
ARID1B	RBBP4	0.0466674	-0.110772	0.625	0.659
ARID1B	RAB10	0.0469041	-0.13481	0.405	0.463
ARID1B	CCNY	0.0475421	-0.122122	0.207	0.267
ARID1B	ADD1	0.0480207	-0.11923	0.207	0.267
ARID1B	NPR2	0.0485991	-0.114878	0.129	0.183
ARID1B	SLC7A6OS	0.0488945	-0.108467	0.155	0.214
ARID1B	SERBP1	0.0492419	-0.107026	0.784	0.832
ARID1B	MRPL47	0.0495583	-0.140617	0.733	0.712
ARID1B	DCX	0.0497081	-0.12331	0.69	0.715
ARID1B	SMARCA1	0.0501242	-0.102773	0.259	0.321
ARID1B	AFF4	0.0515106	-0.132859	0.371	0.415
ARID1B	UBE3A	0.0516656	-0.142065	0.474	0.522
ARID1B	IMP3	0.0523555	-0.141394	0.435	0.491
ARID1B	UBE2V2	0.0527329	-0.123975	0.478	0.529
ARID1B	RLIM	0.0530084	-0.124233	0.151	0.206
ARID1B	ANKRD54	0.0538116	-0.126173	0.181	0.234
ARID1B	MECP2	0.0545364	-0.147689	0.388	0.435
ARID1B	PHYH	0.0559159	-0.119148	0.207	0.262
ARID1B	PVRL2	0.0571038	-0.106347	0.267	0.328
ARID1B	NAT14	0.0572671	-0.145508	0.336	0.377
ARID1B	ZNF493	0.0576362	-0.121164	0.203	0.26
ARID1B	SNRNP70	0.0577202	-0.117032	0.599	0.636
ARID1B	HUWE1	0.0582712	-0.112093	0.293	0.341
ARID1B	EIF4A1	0.0583684	-0.16772	0.698	0.735
ARID1B	CDK4	0.0583995	-0.112173	0.483	0.504
ARID1B	ATP1A3	0.0589498	-0.121003	0.487	0.534
ARID1B	COIL	0.0595234	-0.152934	0.31	0.351
ARID1B	GART	0.0603706	-0.107995	0.125	0.173
ARID1B	ACAP3	0.0606497	-0.132295	0.319	0.366
ARID1B	ARPC1A	0.0608748	0.108818	0.509	0.438
ARID1B	ZCCHC17	0.061469	-0.109934	0.746	0.761
ARID1B	MRPL30	0.0618435	-0.100596	0.164	0.216
ARID1B	KIF2A	0.0623037	-0.101692	0.448	0.504
ARID1B	C14orf119	0.063161	-0.130572	0.418	0.448
ARID1B	MRPL46	0.0642789	-0.134104	0.284	0.344
ARID1B	PIGF	0.0648883	0.102277	0.362	0.295
ARID1B	DPY30	0.065582	-0.129609	0.681	0.7
ARID1B	TCEAL7	0.0661117	0.135835	0.767	0.687
ARID1B	NASP	0.0661939	-0.142102	0.379	0.422
ARID1B	CHMP5	0.0661985	-0.14869	0.5	0.519
ARID1B	C4orf27	0.0668392	-0.101367	0.405	0.468
ARID1B	TCEAL3	0.0689094	-0.113647	0.134	0.183
ARID1B	HSPA5	0.0691519	-0.103956	0.289	0.351
ARID1B	TMED10	0.0692039	-0.12384	0.228	0.285
ARID1B	NUMBL	0.0694441	-0.107631	0.138	0.188
ARID1B	LLNLR-245B6.1	0.0706334	-0.117994	0.651	0.667
ARID1B	TOX4	0.0710676	-0.140026	0.392	0.435
ARID1B	ZIC4	0.0713555	-0.15165	0.379	0.42
ARID1B	C6orf203	0.0722036	-0.11744	0.233	0.288
ARID1B	MRTO4	0.0722118	-0.109737	0.241	0.303
ARID1B	TMBIM6	0.0737977	-0.100639	0.547	0.583
ARID1B	EIF4A2	0.0738526	0.13408	0.724	0.674
ARID1B	ACVR2B	0.0739436	-0.123948	0.233	0.28
ARID1B	SATB1	0.0740334	-0.11414	0.384	0.448
ARID1B	RCC2	0.0740961	-0.124818	0.224	0.272
ARID1B	CCDC43	0.0744704	-0.101811	0.172	0.221
ARID1B	DYNC1H1	0.0748429	0.10542	0.841	0.786
ARID1B	EBF3	0.075277	-0.12161	0.47	0.522
ARID1B	TAX1BP1	0.0757525	-0.102587	0.565	0.618
ARID1B	MED19	0.0759657	-0.143263	0.522	0.55
ARID1B	LRIF1	0.0774984	-0.114345	0.284	0.336
ARID1B	TXNDC17	0.0784824	-0.11581	0.793	0.822
ARID1B	ANK2	0.0787515	-0.14827	0.366	0.417
ARID1B	ASH1L	0.0795703	-0.12776	0.233	0.28
ARID1B	TMED9	0.0810838	-0.110522	0.461	0.506
ARID1B	EWSR1	0.0811856	-0.123282	0.509	0.537
ARID1B	ZRSR2	0.0813345	-0.109857	0.134	0.181
ARID1B	YIPF6	0.081759	-0.108248	0.366	0.425
ARID1B	ISCU	0.0829771	-0.116749	0.629	0.644
ARID1B	COMMD1	0.0837553	-0.117936	0.457	0.499
ARID1B	MRPS17	0.0844563	-0.105099	0.168	0.214
ARID1B	PYM1	0.0846963	-0.125969	0.358	0.394
ARID1B	PPIH	0.0858908	-0.109793	0.129	0.176
ARID1B	ZNF106	0.0865136	-0.108071	0.315	0.366
ARID1B	GTF3C5	0.0865441	-0.11387	0.172	0.221
ARID1B	SKIV2L2	0.0872305	-0.103797	0.388	0.438
ARID1B	FAM210B	0.0872306	-0.137466	0.341	0.379
ARID1B	MYO6	0.0883469	-0.125938	0.323	0.377
ARID1B	CLIC1	0.0905402	0.106373	0.797	0.763
ARID1B	POU4F1	0.0908367	-0.105823	0.789	0.789
ARID1B	CTNNB1	0.0913227	0.128959	0.556	0.606
ARID1B	FABP3	0.091704	0.103892	0.487	0.425
ARID1B	RBM25	0.0923615	-0.124864	0.621	0.628
ARID1B	ADRM1	0.0934812	-0.104625	0.573	0.593
ARID1B	ATM	0.0938036	-0.119403	0.233	0.277
ARID1B	NIN	0.0956806	-0.10186	0.151	0.196
ARID1B	PTGDS	0.0966993	-0.16712	0.323	0.372
ARID1B	SRSF10	0.0968351	-0.151346	0.522	0.547
ARID1B	BEX1	0.0986386	-0.187906	0.341	0.392
ARID1B	PIH1D1	0.0991278	0.100619	0.44	0.377
ARID1B	CYHR1	0.0998068	-0.129285	0.284	0.326
ARID1B	STRAP	0.100278	-0.114032	0.509	0.532
ARID1B	ECHS1	0.100744	-0.118345	0.668	0.702
ARID1B	MYDGF	0.101026	-0.117973	0.513	0.555
ARID1B	RBM8A	0.10237	-0.101431	0.802	0.809
ARID1B	FADS2	0.10242	-0.121207	0.397	0.433
ARID1B	DRAXIN	0.102903	-0.112902	0.668	0.7
ARID1B	ELOVL4	0.103077	-0.101457	0.155	0.196
ARID1B	ACSF2	0.103299	-0.101546	0.121	0.163
ARID1B	CLINT1	0.103526	-0.120133	0.241	0.29
ARID1B	PCMTD1	0.103805	-0.135984	0.315	0.344
ARID1B	ZIC2	0.103983	-0.116947	0.159	0.201
ARID1B	GPANK1	0.105037	-0.133672	0.517	0.539
ARID1B	ARF4	0.106382	-0.104961	0.457	0.494
ARID1B	SUGP2	0.106502	-0.112705	0.302	0.346
ARID1B	R3HDM2	0.106614	-0.102239	0.194	0.242
ARID1B	APMAP	0.107141	-0.104494	0.336	0.389
ARID1B	SMCR5	0.108738	-0.117174	0.392	0.417
ARID1B	COPS5	0.109025	-0.126968	0.358	0.387
ARID1B	RAC1	0.109427	-0.115837	0.366	0.394
ARID1B	PLXNA3	0.110463	-0.124553	0.168	0.211
ARID1B	LEPROTL1	0.110882	-0.113911	0.267	0.313
ARID1B	SCO2	0.111562	0.105483	0.388	0.326
ARID1B	DPCD	0.112803	-0.131852	0.237	0.282
ARID1B	MRPS10	0.114102	-0.102076	0.332	0.374
ARID1B	SZRD1	0.116321	-0.109105	0.198	0.242
ARID1B	SMG1	0.116866	-0.108595	0.142	0.183
ARID1B	SQSTM1	0.11806	-0.100277	0.375	0.417
ARID1B	SF3A3	0.119669	-0.118416	0.237	0.272
ARID1B	CUL5	0.120931	-0.115159	0.297	0.341
ARID1B	RNF24	0.121157	-0.105762	0.267	0.316
ARID1B	RNF130	0.121371	-0.12041	0.491	0.511
ARID1B	TPM2	0.121636	-0.112364	0.345	0.389
ARID1B	ATCAY	0.123649	-0.100844	0.289	0.328
ARID1B	WAPL	0.123907	-0.121925	0.237	0.28
ARID1B	SNRPA	0.124067	-0.11609	0.302	0.338
ARID1B	FNDC3A	0.125313	-0.113014	0.254	0.29
ARID1B	NHLH2	0.12656	-0.109481	0.556	0.588
ARID1B	TUBA1A	0.12696	0.120726	0.996	0.995
ARID1B	MSI2	0.127496	-0.126104	0.56	0.595
ARID1B	PPP2R1A	0.129039	-0.103154	0.483	0.489
ARID1B	BAIAP2	0.129661	-0.119083	0.228	0.262
ARID1B	ATP6V0D1	0.131473	-0.116996	0.366	0.394
ARID1B	TXNIP	0.132734	-0.172038	0.284	0.333
ARID1B	SVIL	0.134327	-0.112764	0.427	0.473
ARID1B	IFT22	0.135535	-0.128773	0.25	0.28
ARID1B	ATP5B	0.135673	-0.102913	0.797	0.837
ARID1B	CORO2B	0.13826	-0.12665	0.233	0.265
ARID1B	METAP2	0.139475	-0.128751	0.728	0.738
ARID1B	CMTM7	0.141852	-0.114069	0.341	0.374
ARID1B	HNRNPD	0.141968	-0.111732	0.547	0.56
ARID1B	CCDC107	0.143159	-0.113239	0.444	0.476
ARID1B	SEMA6A	0.143196	-0.108979	0.28	0.321
ARID1B	ISCA2	0.152334	-0.124362	0.28	0.313
ARID1B	EPN2	0.152408	-0.130919	0.302	0.328
ARID1B	PUM1	0.153464	-0.111962	0.461	0.486
ARID1B	ILF3-AS1	0.154572	-0.109749	0.431	0.463
ARID1B	TNRC6A	0.155228	-0.109323	0.453	0.478
ARID1B	KLF12	0.155593	-0.114768	0.159	0.196
ARID1B	NMT1	0.157086	-0.124351	0.698	0.725
ARID1B	STRA13	0.161492	-0.109522	0.599	0.606
ARID1B	RBBP7	0.161627	-0.107739	0.276	0.305
ARID1B	CENPT	0.161762	-0.108133	0.142	0.176
ARID1B	BORCS7	0.163277	-0.112836	0.323	0.359
ARID1B	CKS2	0.165159	-0.100198	0.328	0.366
ARID1B	NDUFC1	0.167318	-0.100822	0.556	0.588
ARID1B	MNAT1	0.167339	-0.114606	0.44	0.453
ARID1B	CWF19L2	0.167381	-0.111671	0.362	0.392
ARID1B	FAM173A	0.169112	-0.116782	0.181	0.219
ARID1B	MT-CO1	0.169166	0.159513	1	1
ARID1B	UBE2D2	0.16925	-0.107993	0.677	0.707
ARID1B	FBXL15	0.170594	-0.127408	0.28	0.313
ARID1B	TNFRSF19	0.172036	-0.150046	0.272	0.298
ARID1B	FADS1	0.173966	-0.120792	0.629	0.611
ARID1B	BLCAP	0.178498	-0.101478	0.211	0.242
ARID1B	LGI4	0.179126	-0.101	0.272	0.318
ARID1B	TTC9C	0.179954	-0.102336	0.211	0.249
ARID1B	SCAF11	0.180111	-0.131781	0.547	0.58
ARID1B	UBE2B	0.181597	-0.134394	0.569	0.575
ARID1B	IRX2	0.184568	-0.128151	0.422	0.445
ARID1B	HNRNPA0	0.18695	-0.106906	0.681	0.692
ARID1B	CHD2	0.188202	-0.106681	0.297	0.328
ARID1B	AUP1	0.189691	-0.110531	0.457	0.463
ARID1B	RARS	0.193733	0.101675	0.371	0.303
ARID1B	ADGRL1	0.207783	-0.11142	0.216	0.249
ARID1B	KIAA1456	0.208458	-0.103553	0.276	0.31
ARID1B	RP11-12G12.7	0.211514	-0.1195	0.181	0.211
ARID1B	BRD2	0.211834	-0.119875	0.427	0.433
ARID1B	DNALI1	0.212764	-0.125328	0.155	0.178
ARID1B	ATXN3	0.213093	-0.10512	0.306	0.331
ARID1B	TYW3	0.214239	-0.103968	0.134	0.163
ARID1B	FNBP4	0.218409	-0.102386	0.284	0.313
ARID1B	MAP7D3	0.219349	-0.111436	0.19	0.224
ARID1B	ACP1	0.219631	-0.126431	0.625	0.585
ARID1B	SCARB2	0.221294	-0.101142	0.371	0.397
ARID1B	ORAI2	0.224891	-0.142951	0.457	0.463
ARID1B	RDH11	0.22576	-0.105328	0.332	0.356
ARID1B	EIF3E	0.226063	0.112256	0.685	0.669
ARID1B	LUC7L	0.230907	-0.116923	0.362	0.382
ARID1B	ACTG1	0.238724	0.136405	0.978	0.987
ARID1B	RP11-14N7.2	0.246352	-0.102013	0.267	0.29
ARID1B	AK1	0.246485	-0.106213	0.724	0.728
ARID1B	PRKAR2A	0.248342	-0.112422	0.401	0.417
ARID1B	ASAP1	0.258484	-0.110923	0.168	0.191
ARID1B	MAZ	0.265428	-0.105262	0.302	0.331
ARID1B	TSPAN14	0.274477	-0.104711	0.353	0.361
ARID1B	KPNA4	0.280411	-0.117339	0.332	0.356
ARID1B	PHF20L1	0.283254	-0.10437	0.392	0.399
ARID1B	C7orf50	0.284141	-0.113137	0.401	0.412
ARID1B	ITM2C	0.285172	-0.100328	0.629	0.628
ARID1B	AKAP8L	0.29253	-0.10725	0.349	0.369
ARID1B	DCTN5	0.293854	-0.113721	0.25	0.267
ARID1B	LSM14A	0.295488	-0.141872	0.289	0.3
ARID1B	PNRC2	0.296101	-0.10244	0.168	0.188
ARID1B	TRAPPC4	0.30128	-0.114571	0.53	0.522
ARID1B	DNAJC19	0.305498	-0.104774	0.526	0.524
ARID1B	PDIA3	0.309188	-0.106116	0.448	0.45
ARID1B	SLC5A3	0.316438	-0.108175	0.259	0.272
ARID1B	CWC27	0.322424	-0.110409	0.336	0.356
ARID1B	PRPF40A	0.326557	-0.102682	0.672	0.644
ARID1B	PPP1R27	0.329202	-0.104789	0.121	0.142
ARID1B	DPF2	0.331006	-0.124004	0.362	0.361
ARID1B	EXOSC4	0.332657	-0.104763	0.526	0.542
ARID1B	LINC00657	0.337556	-0.111437	0.366	0.384
ARID1B	ZNF605	0.346184	-0.101071	0.228	0.244
ARID1B	RSL1D1	0.346834	-0.109663	0.625	0.608
ARID1B	JPX	0.363811	-0.101271	0.487	0.486
ARID1B	CDKN1B	0.377432	-0.105351	0.147	0.168
ARID1B	DUOX1	0.382681	-0.102251	0.371	0.397
ARID1B	RPAP2	0.385615	-0.10174	0.306	0.321
ARID1B	KRIT1	0.391848	-0.106979	0.263	0.277
ARID1B	TIMM44	0.392697	-0.110564	0.496	0.489
ARID1B	GOLIM4	0.435314	-0.121312	0.263	0.27
ARID1B	CKLF	0.4485	-0.113922	0.263	0.272
ARID1B	BCCIP	0.466262	-0.107047	0.371	0.359
ARID1B	B9D1	0.467269	-0.103214	0.138	0.15
ARID1B	NHLH1	0.476238	0.103508	0.828	0.804
ARID1B	NOL7	0.484774	-0.12682	0.47	0.453
ARID1B	CYC1	0.491777	-0.135351	0.642	0.623
ARID1B	ARID4A	0.548729	-0.100248	0.409	0.41
ARID1B	POU2F2	0.595547	-0.112182	0.616	0.59
ARID1B	AHI1	0.613318	-0.100335	0.185	0.191
ARID1B	BTN2A2	0.623093	-0.100125	0.276	0.265
ARID1B	MRPL32	0.647452	-0.110452	0.672	0.611
ARID1B	PDCD11	0.706847	-0.107925	0.431	0.412
ARID1B	RSBN1L	0.730983	-0.10118	0.698	0.677
ARID1B	MRPS18A	0.809074	-0.107207	0.409	0.384
Knockdown	Gene	p_val	avg_logFC	pct.1	pct.2
ASH1L	Nontargeting-G3-gene	8.6984e-06	-0.179099	0	0.107
ASH1L	SEH1L	4.11096e-05	0.139206	0.163	0.056
ASH1L	PMEL	9.65251e-05	0.325035	0.465	0.318
ASH1L	MT-CO2	0.00012476	-0.130527	1	1
ASH1L	MIAT	0.000135792	-0.240357	0.721	0.809
ASH1L	MT-CYB	0.000193917	-0.145643	1	0.99
ASH1L	SOCS6	0.000356343	0.104145	0.134	0.048
ASH1L	HIST1H4C	0.000411887	-0.396941	0.762	0.837
ASH1L	MT-ATP6	0.00046089	0.175385	1	0.995
ASH1L	MT-ND3	0.000680033	-0.180161	0.994	0.997
ASH1L	GSTP1	0.000707456	0.144336	0.936	0.941
ASH1L	GIGYF2	0.000826547	-0.186667	0.192	0.321
ASH1L	WRB	0.00119443	0.19838	0.5	0.372
ASH1L	TFDP2	0.00124731	-0.162577	0.744	0.796
ASH1L	BTG3	0.00140534	0.133491	0.291	0.165
ASH1L	NOS1AP	0.00146222	-0.122094	0.029	0.109
ASH1L	EPB41	0.00157003	-0.159483	0.448	0.59
ASH1L	CPNE3	0.00168467	0.16445	0.465	0.326
ASH1L	ATF7IP2	0.00187386	0.115548	0.163	0.076
ASH1L	GNG3	0.0019865	0.235697	0.767	0.684
ASH1L	ASH1L	0.00210276	-0.135115	0.151	0.28
ASH1L	SRSF11	0.00266579	-0.207726	0.733	0.814
ASH1L	TTYH2	0.0026897	0.162319	0.267	0.16
ASH1L	SURF6	0.00280612	-0.176547	0.192	0.305
ASH1L	SLC5A3	0.00282292	-0.121021	0.157	0.272
ASH1L	CLASP2	0.0029637	0.105331	0.215	0.117
ASH1L	DCXR	0.00301267	0.172086	0.703	0.59
ASH1L	LYRM5	0.00311225	0.127437	0.32	0.204
ASH1L	MSI1	0.00335851	-0.223851	0.238	0.351
ASH1L	S100A6	0.00344115	0.318227	0.826	0.758
ASH1L	XKR7	0.00353568	-0.141831	0.215	0.333
ASH1L	KIAA1109	0.00364292	-0.141425	0.151	0.26
ASH1L	DAP3	0.00384084	-0.117419	0.18	0.295
ASH1L	DPP8	0.00400264	-0.165444	0.076	0.16
ASH1L	TOX4	0.0042528	-0.207144	0.343	0.435
ASH1L	TIMM17B	0.00438623	-0.157148	0.622	0.71
ASH1L	SNRPN	0.00456154	-0.135662	0.762	0.832
ASH1L	ARRDC3	0.0048375	0.102181	0.14	0.066
ASH1L	CLIC1	0.0050921	0.19447	0.797	0.763
ASH1L	ADAR	0.00548379	-0.149516	0.279	0.382
ASH1L	CNOT7	0.00554036	-0.127646	0.401	0.534
ASH1L	LYRM1	0.00559438	0.110312	0.285	0.178
ASH1L	PCIF1	0.00567008	0.12661	0.227	0.13
ASH1L	AKR1C1	0.00567496	0.124667	0.273	0.173
ASH1L	CEP164	0.00573785	0.100613	0.285	0.176
ASH1L	DDB1	0.00579756	-0.169301	0.25	0.351
ASH1L	ELAVL3	0.00620363	-0.12911	0.913	0.908
ASH1L	EEF1B2	0.00623532	-0.136371	0.901	0.944
ASH1L	HDAC2	0.00703324	-0.126599	0.797	0.865
ASH1L	EMC10	0.0071096	-0.156185	0.18	0.277
ASH1L	COX4I1	0.00717732	0.112372	0.994	0.972
ASH1L	HLTF	0.00727415	-0.174616	0.32	0.425
ASH1L	FARS2	0.00730797	-0.107481	0.041	0.107
ASH1L	YIPF4	0.00756665	-0.191666	0.355	0.463
ASH1L	STX8	0.00758254	0.132427	0.547	0.407
ASH1L	BRD8	0.00794678	0.123164	0.349	0.237
ASH1L	ARGLU1	0.00801919	-0.153339	0.797	0.812
ASH1L	FDFT1	0.00819069	-0.163981	0.436	0.529
ASH1L	SNX29	0.00830127	-0.114889	0.052	0.125
ASH1L	MT-ATP8	0.00835452	0.141264	0.244	0.155
ASH1L	CTD-2017D11.1	0.00842264	-0.100369	0.076	0.158
ASH1L	ST7	0.00856115	0.104894	0.262	0.163
ASH1L	DSTYK	0.00868879	-0.186233	0.145	0.234
ASH1L	MAPK1IP1L	0.00880903	-0.135502	0.238	0.336
ASH1L	ARPC5L	0.00890343	-0.161204	0.297	0.397
ASH1L	BZW2	0.0089039	0.132885	0.535	0.427
ASH1L	SAMD1	0.00910998	-0.127025	0.093	0.178
ASH1L	PXDN	0.00940748	-0.11957	0.064	0.137
ASH1L	SRRM2	0.00957228	-0.177812	0.686	0.761
ASH1L	DPYSL2	0.00970679	-0.147018	0.884	0.883
ASH1L	ISOC2	0.00971281	-0.125549	0.36	0.463
ASH1L	EBF1	0.00974891	-0.129457	0.709	0.748
ASH1L	FAM45A	0.00983705	0.127027	0.401	0.298
ASH1L	MEF2C	0.00992574	-0.17062	0.459	0.547
ASH1L	ZADH2	0.0100937	-0.114693	0.058	0.13
ASH1L	ZEB2	0.0103872	-0.164094	0.523	0.603
ASH1L	TM2D2	0.0104088	0.10542	0.221	0.135
ASH1L	ZNF146	0.0108156	-0.159416	0.116	0.198
ASH1L	ZNF106	0.0109373	-0.178035	0.273	0.366
ASH1L	SLC35B1	0.0111736	0.111885	0.465	0.333
ASH1L	UBFD1	0.011346	-0.110983	0.087	0.165
ASH1L	STOML2	0.0114209	0.138464	0.64	0.527
ASH1L	C14orf1	0.0114739	0.137832	0.436	0.326
ASH1L	CETN2	0.011545	0.132668	0.477	0.359
ASH1L	DUT	0.0118177	0.139849	0.547	0.433
ASH1L	TMCO1	0.012153	-0.205635	0.564	0.608
ASH1L	FRMD4A	0.0123195	0.152842	0.302	0.204
ASH1L	UBE3A	0.0123848	-0.178539	0.442	0.522
ASH1L	PSMD13	0.0126416	0.143454	0.413	0.318
ASH1L	APBB1	0.0129256	-0.127902	0.25	0.338
ASH1L	POLR2B	0.0131432	-0.158517	0.378	0.478
ASH1L	SMG1	0.0137119	-0.125212	0.105	0.183
ASH1L	GLG1	0.0140639	0.132488	0.407	0.308
ASH1L	APOO	0.014267	-0.148393	0.227	0.313
ASH1L	LETMD1	0.0142793	0.107993	0.233	0.15
ASH1L	WSB2	0.014285	0.115241	0.18	0.104
ASH1L	SEMA6A	0.0150636	-0.155309	0.233	0.321
ASH1L	UBAC1	0.0150671	-0.106044	0.087	0.163
ASH1L	DRAP1	0.0150905	0.109986	0.773	0.7
ASH1L	KCTD20	0.0151118	-0.115859	0.128	0.211
ASH1L	OARD1	0.0154277	0.108915	0.337	0.234
ASH1L	KCNQ1OT1	0.0156526	-0.195562	0.378	0.478
ASH1L	TCP10L	0.0158745	0.11688	0.5	0.392
ASH1L	TIMP2	0.0159789	-0.107033	0.39	0.486
ASH1L	BAZ1B	0.0160057	-0.15115	0.395	0.494
ASH1L	SMARCD1	0.016366	-0.201301	0.517	0.593
ASH1L	CLK3	0.0165654	-0.103731	0.163	0.257
ASH1L	SF3B1	0.0166099	-0.132275	0.453	0.55
ASH1L	TMEM258	0.0171578	0.126877	0.936	0.913
ASH1L	C18orf8	0.0175245	0.150777	0.372	0.27
ASH1L	CKB	0.0182453	0.120266	0.983	0.972
ASH1L	ORMDL2	0.0183618	0.130565	0.326	0.237
ASH1L	PPP1R27	0.0185782	0.102372	0.227	0.142
ASH1L	ITSN1	0.0186658	-0.155778	0.262	0.344
ASH1L	CLASRP	0.0187555	-0.106041	0.058	0.122
ASH1L	ZNF518A	0.018872	0.100907	0.314	0.219
ASH1L	KC6	0.0190288	-0.166642	0.302	0.372
ASH1L	MRPL27	0.0197111	-0.151884	0.669	0.72
ASH1L	RPAP2	0.0199933	-0.180736	0.233	0.321
ASH1L	LINC00662	0.0203176	-0.134889	0.198	0.28
ASH1L	C12orf10	0.0207139	-0.154678	0.36	0.461
ASH1L	MIF-AS1	0.0216693	-0.129557	0.093	0.165
ASH1L	ITGAE	0.0222122	-0.135635	0.453	0.539
ASH1L	WDR60	0.0224638	-0.14818	0.297	0.384
ASH1L	NAPG	0.0225794	0.100568	0.343	0.242
ASH1L	POU4F1	0.0226387	-0.141106	0.744	0.789
ASH1L	TSPAN7	0.0226928	0.166291	0.337	0.265
ASH1L	PELP1	0.0228857	-0.119993	0.128	0.204
ASH1L	CDKN2AIPNL	0.0229202	0.113309	0.459	0.349
ASH1L	FDPS	0.0230882	0.211933	0.686	0.623
ASH1L	SPOP	0.0235064	-0.11851	0.209	0.293
ASH1L	CNDP2	0.0238169	0.100025	0.238	0.16
ASH1L	ZNF385A	0.0240296	0.158023	0.203	0.13
ASH1L	PATZ1	0.0244959	0.129433	0.262	0.178
ASH1L	CTNNA1	0.0245441	-0.142099	0.314	0.397
ASH1L	DCC	0.0252622	-0.137329	0.349	0.435
ASH1L	CXADR	0.0255058	-0.101645	0.169	0.252
ASH1L	FABP3	0.0256087	0.454848	0.494	0.425
ASH1L	AAK1	0.0260361	-0.133344	0.494	0.578
ASH1L	PEX16	0.0261415	0.109664	0.285	0.201
ASH1L	GPATCH8	0.0265384	-0.170639	0.314	0.392
ASH1L	IGFBP5	0.0272992	-0.293249	0.064	0.125
ASH1L	TNRC6A	0.0273772	-0.166246	0.401	0.478
ASH1L	CDK5	0.0274136	0.119378	0.453	0.351
ASH1L	BAG1	0.0275337	-0.170372	0.413	0.486
ASH1L	CBX2	0.0275353	0.117156	0.174	0.109
ASH1L	ZNF462	0.0277867	-0.127238	0.39	0.483
ASH1L	FAM168B	0.0281228	-0.151613	0.198	0.265
ASH1L	NHP2	0.0281936	-0.112982	0.872	0.898
ASH1L	YPEL5	0.0283712	-0.145068	0.215	0.29
ASH1L	TMEM167A	0.0284345	0.109299	0.535	0.435
ASH1L	TMSB4X	0.0288061	0.118966	1	1
ASH1L	RTF1	0.0292345	-0.11578	0.895	0.911
ASH1L	CARHSP1	0.0294946	0.155537	0.721	0.616
ASH1L	UBQLN1	0.0297841	-0.15716	0.384	0.458
ASH1L	NUP188	0.0299536	-0.106383	0.058	0.115
ASH1L	ZNF35	0.0299613	0.100149	0.256	0.176
ASH1L	FUNDC1	0.0300436	-0.120273	0.256	0.333
ASH1L	DDT	0.0305549	0.144136	0.68	0.598
ASH1L	MRPS14	0.0305917	0.128956	0.436	0.354
ASH1L	MPHOSPH10	0.0307278	-0.160436	0.384	0.458
ASH1L	ZNF804A	0.0310716	-0.107316	0.122	0.188
ASH1L	DCAF11	0.0311552	-0.126341	0.081	0.14
ASH1L	PPP2R5E	0.0313038	-0.150909	0.267	0.344
ASH1L	GLO1	0.0317762	0.100008	0.407	0.321
ASH1L	SKIV2L2	0.0325144	-0.118303	0.343	0.438
ASH1L	EMC6	0.0326711	-0.136475	0.651	0.695
ASH1L	RNF146	0.0327874	-0.11322	0.145	0.219
ASH1L	SPG21	0.0330419	0.117399	0.36	0.288
ASH1L	VPS13C	0.0330774	-0.168275	0.157	0.221
ASH1L	EIF5B	0.0335033	-0.115271	0.866	0.898
ASH1L	C6orf1	0.0338059	0.140012	0.448	0.356
ASH1L	TMEM134	0.0339423	-0.111226	0.151	0.224
ASH1L	POLR2A	0.0339426	-0.159158	0.395	0.481
ASH1L	PTTG1	0.0340012	-0.155252	0.122	0.066
ASH1L	CARM1	0.034169	-0.146259	0.308	0.389
ASH1L	MAP2	0.0343772	-0.156711	0.767	0.794
ASH1L	KAT6A	0.0344278	-0.139943	0.238	0.305
ASH1L	SMARCA5	0.0345529	-0.144727	0.663	0.761
ASH1L	ZBTB10	0.0352847	-0.128652	0.174	0.242
ASH1L	SBNO1	0.0353841	-0.128427	0.331	0.415
ASH1L	NDUFS7	0.0353907	-0.11063	0.855	0.835
ASH1L	TSEN34	0.0356283	0.107238	0.541	0.45
ASH1L	RAB21	0.0357339	-0.112485	0.105	0.168
ASH1L	GBA2	0.0359291	-0.145847	0.233	0.298
ASH1L	ASIC4	0.0360924	-0.136962	0.221	0.29
ASH1L	CENPF	0.0362017	-0.21169	0.116	0.176
ASH1L	PNISR	0.0363466	-0.104803	0.872	0.883
ASH1L	SST	0.0363689	0.1091	0.11	0.059
ASH1L	TAOK1	0.036393	-0.150376	0.291	0.366
ASH1L	ZIC2	0.036476	-0.105834	0.128	0.201
ASH1L	N4BP2L2	0.0377177	-0.142772	0.581	0.641
ASH1L	SRA1	0.0377221	-0.148532	0.413	0.506
ASH1L	RNF130	0.0383926	-0.130576	0.436	0.511
ASH1L	TP53I3	0.0385907	0.11573	0.238	0.165
ASH1L	ASGR1	0.0389377	0.135731	0.233	0.165
ASH1L	CELF4	0.0389912	-0.105981	0.523	0.603
ASH1L	TMEM97	0.0391562	0.173866	0.547	0.468
ASH1L	KIAA2013	0.0395765	-0.118232	0.186	0.26
ASH1L	B3GAT2	0.0401288	-0.142848	0.215	0.288
ASH1L	SH3BP5L	0.0402684	-0.125089	0.099	0.16
ASH1L	LINC00657	0.0407416	-0.161516	0.302	0.384
ASH1L	HMGN2	0.0408146	-0.126947	0.651	0.71
ASH1L	MRPL36	0.040927	-0.147985	0.506	0.575
ASH1L	ZIC4	0.0409951	-0.149937	0.343	0.42
ASH1L	PRELID3B	0.0410927	-0.125405	0.244	0.313
ASH1L	ATF6B	0.041355	-0.11372	0.297	0.387
ASH1L	THOC5	0.0413877	0.130444	0.267	0.198
ASH1L	ACAP3	0.0417279	-0.125729	0.308	0.366
ASH1L	MTMR9	0.041839	-0.124046	0.209	0.285
ASH1L	RBMX	0.041904	-0.126489	0.785	0.847
ASH1L	TMEM50A	0.0419452	0.104898	0.616	0.519
ASH1L	CCDC47	0.0422937	0.113781	0.203	0.137
ASH1L	SHPRH	0.0426224	-0.115546	0.238	0.323
ASH1L	SF1	0.0432752	-0.109538	0.465	0.555
ASH1L	LRWD1	0.0433059	-0.105583	0.116	0.178
ASH1L	PTPRG	0.0443789	-0.104776	0.163	0.237
ASH1L	GPS1	0.04504	0.132379	0.372	0.305
ASH1L	RBM39	0.0460129	-0.153804	0.878	0.888
ASH1L	C15orf40	0.0460245	-0.122326	0.267	0.341
ASH1L	EZH2	0.0461326	-0.112744	0.32	0.397
ASH1L	LRRN3	0.0461537	-0.101452	0.116	0.181
ASH1L	TRAP1	0.0462297	0.10484	0.32	0.244
ASH1L	EMP3	0.0466074	0.109461	0.343	0.265
ASH1L	BCLAF1	0.0471838	-0.119229	0.547	0.611
ASH1L	MAP1A	0.0481116	-0.108802	0.61	0.702
ASH1L	NOL3	0.0484709	0.105531	0.355	0.265
ASH1L	NME3	0.0486389	0.119248	0.384	0.298
ASH1L	PUM3	0.0488131	0.108179	0.384	0.308
ASH1L	NIN	0.0491798	-0.119375	0.134	0.196
ASH1L	RTN4	0.0499076	-0.114187	0.89	0.949
ASH1L	AK3	0.050078	-0.117345	0.267	0.328
ASH1L	NANS	0.050489	-0.113479	0.308	0.382
ASH1L	SPAG7	0.0505396	0.119707	0.698	0.628
ASH1L	BTBD7	0.0506207	-0.124265	0.145	0.209
ASH1L	THSD7B	0.0510649	0.101783	0.238	0.165
ASH1L	CHD1	0.0511408	-0.126301	0.297	0.364
ASH1L	STAU2	0.0513479	-0.125509	0.401	0.473
ASH1L	PAIP1	0.0515512	0.137707	0.366	0.28
ASH1L	LAPTM4A	0.0517228	0.149001	0.448	0.377
ASH1L	C21orf59	0.0526138	0.156412	0.895	0.863
ASH1L	AHI1	0.0526334	-0.128579	0.128	0.191
ASH1L	TMEM59	0.0531873	0.128574	0.698	0.613
ASH1L	PRPF40A	0.0533835	-0.141909	0.61	0.644
ASH1L	TRNAU1AP	0.0536692	0.107162	0.326	0.249
ASH1L	UBE2M	0.0538975	-0.105154	0.134	0.198
ASH1L	NUDT11	0.0542403	0.122762	0.227	0.163
ASH1L	SSR2	0.0547406	0.123998	0.785	0.718
ASH1L	RABEP1	0.0552582	-0.146783	0.401	0.461
ASH1L	DEDD2	0.0562994	-0.101564	0.14	0.198
ASH1L	ATRX	0.056309	-0.131772	0.651	0.707
ASH1L	NCOA7	0.0566882	-0.114187	0.145	0.206
ASH1L	SNRPA	0.0570945	0.110186	0.419	0.338
ASH1L	ZNF638	0.0571691	-0.126283	0.355	0.427
ASH1L	SOCS4	0.0574223	-0.160516	0.262	0.323
ASH1L	PPDPF	0.0587482	0.117559	0.942	0.939
ASH1L	SNAP47	0.0590641	-0.10625	0.186	0.254
ASH1L	KHDRBS1	0.0596365	-0.12819	0.622	0.654
ASH1L	WASL	0.0598331	-0.100505	0.186	0.257
ASH1L	SPATS2	0.0599974	-0.124771	0.5	0.552
ASH1L	UBAP2L	0.0609822	-0.116674	0.244	0.308
ASH1L	UBE4B	0.0613265	-0.103385	0.11	0.168
ASH1L	GABARAP	0.0613562	-0.131202	0.547	0.623
ASH1L	SATB1	0.0622796	-0.147502	0.39	0.448
ASH1L	LY6E	0.0625306	-0.174301	0.494	0.555
ASH1L	MRPL50	0.0629342	-0.10514	0.401	0.489
ASH1L	SERAC1	0.0631083	-0.102032	0.076	0.125
ASH1L	PHYH	0.0632637	-0.127125	0.198	0.262
ASH1L	DNAJC7	0.0636662	-0.103846	0.512	0.59
ASH1L	LSM12	0.0638547	-0.117658	0.151	0.219
ASH1L	BAX	0.06434	-0.116729	0.494	0.573
ASH1L	TRA2B	0.0644186	-0.117271	0.599	0.651
ASH1L	HNRNPUL1	0.0644788	-0.122606	0.366	0.43
ASH1L	GAL	0.0650296	0.142157	0.267	0.204
ASH1L	CLCN3	0.0661389	-0.132475	0.233	0.293
ASH1L	DDX6	0.0664275	-0.145086	0.355	0.42
ASH1L	ITFG2	0.066753	-0.107451	0.128	0.186
ASH1L	CUX1	0.068416	-0.121052	0.267	0.326
ASH1L	NAV1	0.0692954	-0.101174	0.622	0.651
ASH1L	RDX	0.0696332	-0.140122	0.657	0.697
ASH1L	ADAL	0.0704257	-0.114291	0.238	0.305
ASH1L	SYNC	0.0707521	-0.120714	0.169	0.232
ASH1L	IFRD1	0.0709503	-0.100804	0.18	0.247
ASH1L	METTL2B	0.0709837	0.135377	0.227	0.173
ASH1L	DRAXIN	0.0713745	-0.13557	0.68	0.7
ASH1L	CNIH4	0.0716978	0.103627	0.517	0.44
ASH1L	RUFY3	0.0719908	-0.107762	0.506	0.583
ASH1L	YAF2	0.0724967	-0.110802	0.471	0.527
ASH1L	MRPS6	0.072741	-0.109205	0.797	0.837
ASH1L	STMN4	0.0737825	0.13735	0.791	0.725
ASH1L	CST3	0.0738979	0.110225	0.791	0.687
ASH1L	PSMD14	0.0739736	-0.10919	0.541	0.603
ASH1L	C19orf25	0.0740184	-0.149351	0.384	0.43
ASH1L	CDH2	0.0741387	0.122439	0.628	0.542
ASH1L	PRRT2	0.0742957	-0.124209	0.326	0.392
ASH1L	GON4L	0.0745923	-0.110175	0.308	0.369
ASH1L	PDAP1	0.0753934	-0.103278	0.767	0.799
ASH1L	RBBP4	0.0754166	-0.106843	0.593	0.659
ASH1L	MRPL2	0.0756798	-0.120728	0.407	0.471
ASH1L	TMEM132A	0.0759949	-0.129547	0.355	0.41
ASH1L	MBD4	0.0765368	-0.127824	0.163	0.221
ASH1L	FOXO3	0.0766309	-0.107588	0.174	0.237
ASH1L	ARPC2	0.0770063	-0.120752	0.767	0.779
ASH1L	ATXN3	0.0779023	-0.129893	0.273	0.331
ASH1L	AKIRIN1	0.0779597	0.102082	0.337	0.267
ASH1L	SEZ6L	0.0794212	0.103889	0.186	0.13
ASH1L	UCHL5	0.0799848	-0.104404	0.157	0.214
ASH1L	POLR2C	0.0801618	-0.117819	0.244	0.303
ASH1L	PPP1R7	0.0805975	0.107099	0.43	0.361
ASH1L	GFRA1	0.0816245	-0.121542	0.343	0.412
ASH1L	MAP3K7	0.0820552	-0.104918	0.081	0.127
ASH1L	SMIM12	0.0837641	-0.143384	0.349	0.399
ASH1L	RAF1	0.0843085	-0.109975	0.215	0.275
ASH1L	BIN1	0.0856137	-0.108898	0.256	0.316
ASH1L	SSTR2	0.0860511	0.127741	0.477	0.407
ASH1L	RNF168	0.0862439	0.100686	0.209	0.15
ASH1L	CWF19L2	0.088009	-0.138245	0.326	0.392
ASH1L	HNRNPH3	0.0880275	-0.142841	0.477	0.542
ASH1L	KPNA1	0.0881439	-0.107955	0.203	0.262
ASH1L	ZNF605	0.0882863	-0.137907	0.192	0.244
ASH1L	USP34	0.0887876	-0.123978	0.314	0.372
ASH1L	ARVCF	0.0899127	0.102173	0.122	0.079
ASH1L	MPC1	0.0904368	-0.140078	0.279	0.341
ASH1L	PHF14	0.091007	-0.126141	0.692	0.715
ASH1L	UBE2F	0.091435	-0.131704	0.209	0.257
ASH1L	RUSC1	0.0932267	-0.107522	0.25	0.308
ASH1L	CYSTM1	0.0933486	0.111895	0.5	0.415
ASH1L	NIT1	0.0936735	0.10156	0.169	0.117
ASH1L	NAA10	0.0944279	-0.123059	0.61	0.644
ASH1L	CCDC53	0.0944585	-0.103379	0.233	0.295
ASH1L	C1orf21	0.0945036	-0.117267	0.32	0.372
ASH1L	MYEF2	0.0950312	-0.133836	0.43	0.458
ASH1L	PCM1	0.0950453	-0.124346	0.651	0.697
ASH1L	AFAP1	0.0951857	-0.120704	0.448	0.501
ASH1L	IGF2BP1	0.0969571	-0.137879	0.343	0.399
ASH1L	SHISA5	0.0973229	0.13234	0.529	0.45
ASH1L	HSPA5	0.0992073	-0.104529	0.285	0.351
ASH1L	TSPYL4	0.0994413	-0.129708	0.32	0.372
ASH1L	NOVA1	0.0999721	-0.124475	0.541	0.606
ASH1L	DAD1	0.101159	-0.108593	0.762	0.807
ASH1L	EPB41L4A-AS1	0.10126	0.103874	0.535	0.471
ASH1L	FAM89B	0.101903	-0.125706	0.203	0.252
ASH1L	SQLE	0.101921	0.14057	0.686	0.628
ASH1L	PSMC1	0.102048	-0.106855	0.599	0.631
ASH1L	VSTM2A	0.102879	0.107248	0.244	0.188
ASH1L	MRPS11	0.103166	-0.135372	0.634	0.664
ASH1L	HIST1H2BD	0.10325	-0.116694	0.174	0.229
ASH1L	DCTN1	0.10361	-0.12206	0.593	0.623
ASH1L	PFDN6	0.103784	-0.111301	0.436	0.471
ASH1L	SESN3	0.104581	-0.11183	0.163	0.216
ASH1L	NSUN5	0.105118	-0.106209	0.233	0.293
ASH1L	OLFM1	0.10515	-0.100248	0.302	0.366
ASH1L	DNM1L	0.105597	-0.102948	0.314	0.366
ASH1L	CCDC59	0.10841	-0.131938	0.337	0.394
ASH1L	ATPIF1	0.110456	-0.111086	0.884	0.903
ASH1L	PKIG	0.111682	-0.145242	0.564	0.603
ASH1L	TIMM9	0.111716	-0.102791	0.297	0.344
ASH1L	CHMP3	0.112103	0.109425	0.523	0.461
ASH1L	DDX18	0.112425	-0.100319	0.744	0.768
ASH1L	SOBP	0.11299	0.100711	0.174	0.127
ASH1L	ZMYM2	0.113289	-0.122495	0.221	0.272
ASH1L	WDR66	0.115428	-0.126831	0.105	0.148
ASH1L	TSC22D1	0.116334	-0.113369	0.291	0.333
ASH1L	RAPGEF5	0.117025	-0.114107	0.343	0.397
ASH1L	SLC25A36	0.117265	-0.125989	0.448	0.496
ASH1L	SCRN1	0.117455	-0.113294	0.157	0.204
ASH1L	SPON2	0.118471	0.123269	0.512	0.468
ASH1L	IMMT	0.12312	-0.1092	0.36	0.405
ASH1L	SMARCA1	0.124197	-0.104671	0.267	0.321
ASH1L	HNRNPA3	0.125082	-0.104403	0.622	0.636
ASH1L	PDE7A	0.127503	-0.107364	0.128	0.173
ASH1L	XRCC6	0.127598	-0.112148	0.384	0.43
ASH1L	APP	0.127777	-0.110392	0.605	0.634
ASH1L	NES	0.129193	-0.136369	0.308	0.354
ASH1L	TIMM50	0.130328	-0.120094	0.442	0.491
ASH1L	COMMD4	0.130442	0.108734	0.267	0.219
ASH1L	AC090498.1	0.13134	-0.143547	0.366	0.415
ASH1L	ELAVL1	0.131678	-0.112609	0.262	0.318
ASH1L	ARL5A	0.1334	0.115658	0.378	0.321
ASH1L	NFE2L2	0.133572	-0.110794	0.297	0.346
ASH1L	MECP2	0.134445	-0.150723	0.407	0.435
ASH1L	IRF2BP2	0.135351	-0.106456	0.273	0.328
ASH1L	PLXNA3	0.135919	-0.107563	0.169	0.211
ASH1L	SUPT16H	0.13704	-0.129495	0.541	0.552
ASH1L	ELOVL4	0.13747	-0.104086	0.151	0.196
ASH1L	ZNF292	0.138018	-0.10465	0.453	0.483
ASH1L	MADD	0.140576	0.113791	0.151	0.109
ASH1L	MAT2A	0.140587	-0.118133	0.337	0.374
ASH1L	FAM213A	0.140734	0.102237	0.826	0.791
ASH1L	GOT2	0.143503	-0.124426	0.256	0.298
ASH1L	TMEM9	0.144521	-0.124265	0.32	0.356
ASH1L	SUPT5H	0.14456	-0.135844	0.326	0.374
ASH1L	NUDT3	0.144574	-0.114679	0.552	0.608
ASH1L	CCNK	0.145618	-0.108704	0.203	0.254
ASH1L	TXNIP	0.145863	-0.260152	0.302	0.333
ASH1L	GPRC5C	0.146026	0.101231	0.291	0.242
ASH1L	DHX9	0.148429	-0.117238	0.32	0.364
ASH1L	TRMT6	0.150215	-0.100934	0.267	0.318
ASH1L	KAT6B	0.152211	-0.104803	0.355	0.397
ASH1L	CIRBP	0.152747	-0.103166	0.802	0.814
ASH1L	FUBP1	0.152914	-0.121593	0.424	0.45
ASH1L	CSRP2	0.154313	0.112738	0.523	0.461
ASH1L	ARID4B	0.155383	-0.102504	0.599	0.634
ASH1L	SETD2	0.155437	-0.119036	0.209	0.254
ASH1L	C1orf35	0.156506	-0.138718	0.326	0.369
ASH1L	MTFR1L	0.158084	0.128178	0.285	0.239
ASH1L	RAB31	0.161772	-0.123095	0.587	0.606
ASH1L	PPP1R14B	0.161792	-0.102747	0.442	0.476
ASH1L	IQSEC1	0.165249	-0.12433	0.256	0.298
ASH1L	NHLH1	0.167003	0.105657	0.849	0.804
ASH1L	FYN	0.167522	-0.11299	0.43	0.491
ASH1L	MTX2	0.172889	-0.100963	0.297	0.338
ASH1L	LRIF1	0.174129	-0.117996	0.285	0.336
ASH1L	S100A13	0.177286	0.101762	0.808	0.819
ASH1L	ATP6V1G2	0.177727	-0.116536	0.355	0.387
ASH1L	SYAP1	0.182186	-0.100971	0.424	0.453
ASH1L	TUBG1	0.182371	-0.105179	0.343	0.377
ASH1L	EIF3M	0.183751	0.110293	0.512	0.466
ASH1L	PBRM1	0.184878	-0.108112	0.448	0.499
ASH1L	RP11-923I11.8	0.186382	-0.121639	0.134	0.168
ASH1L	C19orf60	0.187459	-0.109889	0.506	0.532
ASH1L	TECR	0.188254	0.113312	0.581	0.565
ASH1L	ENAH	0.188426	0.117488	0.651	0.641
ASH1L	PPM1G	0.190041	-0.104931	0.43	0.463
ASH1L	MED19	0.19302	-0.103337	0.523	0.55
ASH1L	WDR82	0.194186	-0.10533	0.349	0.394
ASH1L	KLF12	0.196562	-0.107097	0.157	0.196
ASH1L	ZFHX3	0.199683	-0.103747	0.122	0.158
ASH1L	LARS	0.203505	-0.102021	0.698	0.702
ASH1L	MIDN	0.205101	-0.101874	0.628	0.646
ASH1L	SNN	0.207521	0.121529	0.448	0.394
ASH1L	RP11-12G12.7	0.209903	-0.102806	0.169	0.211
ASH1L	TIMM44	0.210971	-0.112984	0.442	0.489
ASH1L	CANX	0.211247	-0.117326	0.308	0.344
ASH1L	EPC1	0.212465	-0.112578	0.5	0.514
ASH1L	DPF2	0.213029	-0.101331	0.326	0.361
ASH1L	R3HDM2	0.213911	-0.124715	0.209	0.242
ASH1L	USP33	0.216521	-0.102985	0.215	0.26
ASH1L	PRKAR2A	0.22851	-0.103114	0.395	0.417
ASH1L	FAM219B	0.228638	-0.143145	0.25	0.28
ASH1L	ANP32B	0.229995	-0.102716	0.703	0.707
ASH1L	RBM6	0.230689	-0.111884	0.506	0.517
ASH1L	METRN	0.230721	-0.106297	0.436	0.471
ASH1L	ANKIB1	0.232962	-0.109097	0.163	0.198
ASH1L	LRRFIP1	0.233772	-0.10428	0.145	0.178
ASH1L	SS18L2	0.234845	-0.119919	0.424	0.455
ASH1L	AP2M1	0.237797	-0.117911	0.558	0.583
ASH1L	RUNX1T1	0.240103	-0.116772	0.657	0.654
ASH1L	NDUFC1	0.245543	-0.117683	0.564	0.588
ASH1L	CTD-2336O2.1	0.246737	-0.102085	0.134	0.163
ASH1L	LMNA	0.247564	-0.121043	0.192	0.221
ASH1L	TSPAN14	0.25273	-0.117567	0.343	0.361
ASH1L	UBXN7	0.25585	-0.155832	0.215	0.242
ASH1L	DNPH1	0.25658	-0.121377	0.36	0.382
ASH1L	CXXC5	0.257792	-0.107094	0.605	0.606
ASH1L	IWS1	0.258935	-0.113439	0.279	0.31
ASH1L	BAG6	0.261831	-0.109925	0.355	0.374
ASH1L	ASAH1	0.265754	-0.122324	0.297	0.321
ASH1L	PRKDC	0.276082	-0.138005	0.622	0.654
ASH1L	CELF2	0.277833	-0.130465	0.331	0.346
ASH1L	TTC37	0.28148	-0.125541	0.424	0.445
ASH1L	SCNM1	0.283076	-0.140888	0.477	0.486
ASH1L	ACYP1	0.283557	-0.120199	0.291	0.303
ASH1L	STRA13	0.284804	-0.1358	0.61	0.606
ASH1L	CYHR1	0.298455	-0.145386	0.314	0.326
ASH1L	MAP9	0.299981	-0.112954	0.203	0.232
ASH1L	ACTC1	0.302129	0.123556	0.36	0.331
ASH1L	DST	0.312902	0.100839	0.581	0.555
ASH1L	RP9	0.318792	-0.122054	0.39	0.41
ASH1L	GADD45G	0.321088	-0.185324	0.366	0.399
ASH1L	SREBF2	0.334071	-0.10294	0.273	0.298
ASH1L	CERS6	0.339192	-0.101356	0.343	0.359
ASH1L	EHMT2	0.353275	-0.105369	0.401	0.42
ASH1L	ACAT2	0.355442	0.195799	0.517	0.486
ASH1L	BICD1	0.361967	-0.131499	0.558	0.57
ASH1L	HPCA	0.365259	-0.114167	0.494	0.499
ASH1L	ILF3-AS1	0.36588	-0.103152	0.436	0.463
ASH1L	UPF2	0.369402	-0.110649	0.581	0.59
ASH1L	C12orf45	0.370283	-0.104562	0.314	0.344
ASH1L	BAIAP2	0.373998	-0.100839	0.244	0.262
ASH1L	SNRNP25	0.386778	-0.108025	0.43	0.433
ASH1L	CDK2AP2	0.391737	-0.106139	0.32	0.336
ASH1L	TCF12	0.398314	-0.109835	0.314	0.333
ASH1L	NMT1	0.425863	-0.130303	0.715	0.725
ASH1L	RPUSD3	0.429888	-0.10493	0.401	0.412
ASH1L	KALRN	0.519597	-0.114623	0.314	0.313
ASH1L	SCAF11	0.543711	-0.124192	0.599	0.58
ASH1L	DDIT3	0.832871	-0.100329	0.302	0.295
Knockdown	Gene	p_val	avg_logFC	pct.1	pct.2
CHD2	GNG3	1.49244e-12	0.5226	0.833	0.684
CHD2	CHD2	1.21885e-09	-0.311117	0.113	0.328
CHD2	PTMA	2.7647e-08	0.198271	1	1
CHD2	CTD-3064C13.1	3.20378e-08	0.203134	0.28	0.104
CHD2	C21orf59	5.5591e-08	0.363353	0.929	0.863
CHD2	Nontargeting-G3-gene	1.77071e-07	-0.179099	0	0.107
CHD2	CNTN2	3.47811e-07	0.284786	0.301	0.142
CHD2	POU2F2	3.60361e-07	0.289082	0.757	0.59
CHD2	TMSB10	2.21326e-06	0.160798	1	1
CHD2	SIX1	2.28899e-06	-0.225592	0.854	0.898
CHD2	H3F3B	3.21225e-06	-0.162444	0.996	1
CHD2	DOC2B	4.90183e-06	0.169779	0.385	0.206
CHD2	NDUFB10	1.80861e-05	0.170323	0.975	0.969
CHD2	MORF4L2	3.61763e-05	-0.244648	0.477	0.601
CHD2	DDT	8.06647e-05	0.19917	0.753	0.598
CHD2	CDKN2AIPNL	9.1115e-05	0.153987	0.515	0.349
CHD2	CCER2	9.17306e-05	0.241294	0.766	0.679
CHD2	COX7C	0.00012213	0.148874	0.996	0.99
CHD2	HN1	0.00015789	-0.170123	0.962	0.967
CHD2	MANEA-AS1	0.000163757	0.100671	0.172	0.071
CHD2	NDUFB4	0.000173093	0.157282	0.954	0.901
CHD2	DDAH2	0.000242072	0.14729	0.925	0.906
CHD2	GNAI1	0.000303556	0.103447	0.209	0.104
CHD2	SKP1	0.000327504	0.139271	0.95	0.883
CHD2	SYCE1L	0.000428271	0.139392	0.251	0.137
CHD2	NDUFS5	0.000456422	0.10732	0.979	0.98
CHD2	NEFL	0.000477603	-0.192542	0.858	0.855
CHD2	HSP90AA1	0.000478898	0.13756	0.987	0.992
CHD2	CHGB	0.000486943	0.177313	0.439	0.305
CHD2	MYL6	0.000560461	0.12523	0.996	0.987
CHD2	POLR2L	0.000573573	0.146679	0.971	0.931
CHD2	C18orf8	0.000621371	0.272696	0.389	0.27
CHD2	CD24	0.000621931	-0.168933	0.9	0.888
CHD2	MYL12B	0.000653115	0.154818	0.82	0.718
CHD2	NARF	0.000699349	0.138863	0.603	0.448
CHD2	SEH1L	0.000717756	0.115335	0.134	0.056
CHD2	TMEM50A	0.000764441	0.162491	0.661	0.519
CHD2	PKM	0.000783836	0.177999	0.707	0.616
CHD2	NDRG4	0.000807021	0.125741	0.439	0.293
CHD2	KDM6B	0.000818116	0.193398	0.51	0.384
CHD2	GNG8	0.000871612	0.161561	0.615	0.45
CHD2	IMMP2L	0.000897065	0.111059	0.209	0.115
CHD2	TECR	0.000914185	0.187913	0.665	0.565
CHD2	GPRIN3	0.00097605	-0.187896	0.715	0.771
CHD2	CCNY	0.000989886	0.146131	0.393	0.267
CHD2	MFAP4	0.00102739	0.237713	0.431	0.31
CHD2	TCEAL4	0.00104642	0.195495	0.649	0.529
CHD2	MAT2A	0.00106144	-0.18919	0.272	0.374
CHD2	GSTP1	0.00107751	0.139814	0.958	0.941
CHD2	CD63	0.00110595	0.186992	0.921	0.847
CHD2	APLP2	0.00111229	0.189298	0.565	0.438
CHD2	PPDPF	0.00111436	0.126244	0.983	0.939
CHD2	ASNS	0.00115749	0.149401	0.377	0.249
CHD2	SARS	0.00117901	0.184622	0.753	0.674
CHD2	TPT1	0.00119046	-0.101773	0.996	0.99
CHD2	NHLH1	0.00131652	0.159851	0.858	0.804
CHD2	MAP1LC3B	0.00133772	0.137388	0.812	0.69
CHD2	PPP1R17	0.00140354	-0.18751	0.828	0.858
CHD2	DPYSL5	0.00141249	0.143552	0.368	0.252
CHD2	DCTN1	0.00143823	0.148691	0.732	0.623
CHD2	S100A6	0.00145404	0.19055	0.833	0.758
CHD2	RITA1	0.00148415	0.100208	0.222	0.122
CHD2	ROBO2	0.00151718	0.168349	0.527	0.412
CHD2	CELSR3	0.00151852	-0.161401	0.096	0.186
CHD2	EPHB2	0.00159445	0.126017	0.238	0.137
CHD2	ID2	0.00170546	0.194357	0.255	0.158
CHD2	TMOD3	0.00177911	0.130624	0.272	0.17
CHD2	VAT1	0.00182129	-0.161245	0.506	0.611
CHD2	MRPL50	0.00184756	-0.182775	0.41	0.489
CHD2	SERP2	0.00189048	0.138559	0.423	0.293
CHD2	GPR155	0.00193167	0.149076	0.393	0.272
CHD2	CARHSP1	0.00198726	0.196642	0.728	0.616
CHD2	TBC1D16	0.0020015	0.164896	0.372	0.257
CHD2	CHTF8	0.00205166	0.138763	0.314	0.206
CHD2	QPRT	0.00208384	0.127961	0.72	0.583
CHD2	RAB4B	0.00217634	0.117897	0.23	0.132
CHD2	THUMPD3-AS1	0.00242074	-0.162923	0.699	0.763
CHD2	SRL	0.00253684	0.123091	0.243	0.148
CHD2	C6orf48	0.00255016	-0.184334	0.841	0.822
CHD2	CALM1	0.00256822	0.171165	0.987	0.982
CHD2	HIST1H4C	0.00256941	-0.39588	0.799	0.837
CHD2	GDAP1L1	0.00260475	-0.179089	0.393	0.483
CHD2	KLHL24	0.0028093	0.120173	0.41	0.285
CHD2	MNAT1	0.00287537	-0.183439	0.356	0.453
CHD2	PRDX1	0.00296218	0.127105	0.975	0.969
CHD2	MAPK10	0.00307155	0.109335	0.276	0.176
CHD2	TUSC3	0.0032644	0.156313	0.51	0.389
CHD2	IMMP1L	0.00350459	-0.120142	0.473	0.578
CHD2	NFASC	0.00355223	0.151094	0.531	0.399
CHD2	CREBRF	0.00355293	-0.115846	0.079	0.16
CHD2	GYPC	0.00356488	0.179032	0.456	0.341
CHD2	TENM3	0.00369237	0.121666	0.218	0.13
CHD2	VDAC2	0.00381564	0.19032	0.745	0.7
CHD2	AK1	0.00391528	0.13958	0.833	0.728
CHD2	TTC3	0.00423564	0.137493	0.895	0.852
CHD2	FABP3	0.00429403	0.184908	0.519	0.425
CHD2	KDM5A	0.00433181	-0.164683	0.314	0.405
CHD2	ITM2C	0.00434499	0.219449	0.686	0.628
CHD2	PAK1	0.00439418	-0.165741	0.176	0.26
CHD2	ZFAS1	0.00442536	-0.130092	0.921	0.931
CHD2	CDV3	0.00450978	0.10372	0.222	0.135
CHD2	SLC39A10	0.00458264	0.106739	0.569	0.445
CHD2	ROMO1	0.00473025	0.137509	0.866	0.812
CHD2	TALDO1	0.00483524	0.138572	0.586	0.473
CHD2	RUVBL1	0.00484386	0.118465	0.414	0.303
CHD2	EZH2	0.0048721	-0.158582	0.31	0.397
CHD2	STMN4	0.00495698	0.186148	0.766	0.725
CHD2	UNCX	0.00499183	0.127417	0.218	0.135
CHD2	ESD	0.00500262	0.122055	0.749	0.641
CHD2	MAPKAPK5-AS1	0.00504716	0.116524	0.473	0.364
CHD2	MALAT1	0.00508919	0.107892	1	0.997
CHD2	RASGRP2	0.00512255	0.123409	0.218	0.13
CHD2	CIR1	0.00539096	-0.129914	0.523	0.598
CHD2	CAMK2B	0.00540253	0.126388	0.372	0.262
CHD2	AP1G1	0.00548982	-0.124693	0.092	0.165
CHD2	COX5A	0.00551494	0.10233	0.975	0.924
CHD2	MYO10	0.00553368	-0.122071	0.109	0.191
CHD2	CCDC189	0.00563271	0.106727	0.176	0.099
CHD2	MRTO4	0.00628319	-0.168256	0.218	0.303
CHD2	SF3B4	0.00649305	0.11765	0.326	0.229
CHD2	CEP170	0.00677607	0.128643	0.682	0.58
CHD2	CPE	0.00700465	0.112182	0.339	0.242
CHD2	CHTOP	0.00716088	-0.144269	0.259	0.351
CHD2	TRAPPC1	0.00720369	0.116069	0.908	0.858
CHD2	PDZD11	0.0073192	0.14782	0.515	0.407
CHD2	GPS1	0.00744799	0.148647	0.397	0.305
CHD2	WDR83OS	0.00797669	-0.136538	0.916	0.911
CHD2	BNIP3L	0.00801358	0.127091	0.649	0.532
CHD2	DRD2	0.00812568	0.159847	0.385	0.288
CHD2	YTHDF3	0.00812571	0.112213	0.197	0.122
CHD2	CST3	0.00815475	0.205689	0.715	0.687
CHD2	RAPGEF5	0.00845284	-0.190059	0.314	0.397
CHD2	C19orf70	0.00846974	0.141157	0.544	0.427
CHD2	ARL5A	0.0085187	0.112142	0.418	0.321
CHD2	EIF2AK2	0.00858178	-0.110824	0.134	0.214
CHD2	S100A13	0.00863857	0.118092	0.854	0.819
CHD2	TAX1BP3	0.00873159	0.122965	0.452	0.341
CHD2	BCL7A	0.00888248	0.118451	0.854	0.766
CHD2	MRPS12	0.00913224	-0.161223	0.481	0.545
CHD2	VKORC1	0.00916441	0.14	0.741	0.669
CHD2	ABT1	0.00938206	-0.118234	0.218	0.31
CHD2	EEF2	0.00956871	-0.122558	0.895	0.924
CHD2	SPATS2L	0.00958398	0.123467	0.406	0.298
CHD2	MED29	0.00968435	0.150726	0.251	0.17
CHD2	DEF8	0.00977517	0.11354	0.682	0.57
CHD2	FNDC5	0.0104542	0.137736	0.649	0.524
CHD2	NAP1L4	0.010488	0.109137	0.64	0.527
CHD2	DNAJA1	0.0106935	-0.151468	0.69	0.725
CHD2	C11orf73	0.0108482	0.174971	0.674	0.598
CHD2	RPRM	0.0112367	-0.160205	0.213	0.3
CHD2	ZNF397	0.0113624	0.102948	0.234	0.155
CHD2	DST	0.011634	0.172806	0.665	0.555
CHD2	SAR1A	0.0118902	-0.107581	0.205	0.288
CHD2	ATL1	0.011931	0.122053	0.385	0.288
CHD2	TERF2IP	0.0122	0.142514	0.803	0.725
CHD2	FDPS	0.012206	0.12994	0.72	0.623
CHD2	PPP1R27	0.0122822	0.104519	0.226	0.142
CHD2	PRKACA	0.0128072	-0.112654	0.088	0.155
CHD2	FER	0.0129791	-0.114037	0.117	0.193
CHD2	NCAM1	0.0130077	0.157966	0.573	0.506
CHD2	HLA-A	0.0131151	0.182525	0.64	0.567
CHD2	HERC1	0.0131244	0.10827	0.331	0.239
CHD2	TSTD2	0.0133538	-0.130629	0.113	0.186
CHD2	CHMP2A	0.013413	0.129488	0.803	0.702
CHD2	LYAR	0.013478	-0.127181	0.126	0.196
CHD2	ZNF606	0.013556	-0.11215	0.075	0.137
CHD2	SEPT7	0.0139859	0.105032	0.858	0.807
CHD2	H1F0	0.0141767	0.109255	0.322	0.232
CHD2	BCAT1	0.0142762	0.110716	0.657	0.562
CHD2	YTHDF2	0.0143727	0.121373	0.669	0.58
CHD2	MRPL18	0.0143843	-0.109976	0.494	0.557
CHD2	UFC1	0.0143854	-0.120163	0.586	0.654
CHD2	ZNF160	0.0145064	0.108406	0.234	0.155
CHD2	POLR2K	0.0146083	0.134556	0.745	0.669
CHD2	RABAC1	0.0147754	0.114633	0.715	0.634
CHD2	YWHAB	0.0152312	0.112485	0.866	0.814
CHD2	NEFM	0.0153379	-0.15241	0.954	0.954
CHD2	R3HDM2	0.0154868	-0.142474	0.167	0.242
CHD2	SST	0.01561	0.377324	0.113	0.059
CHD2	SFSWAP	0.015783	-0.15052	0.167	0.242
CHD2	MSL3	0.0159939	-0.140072	0.159	0.232
CHD2	JPX	0.0160949	-0.161901	0.418	0.486
CHD2	HMGB3	0.0163601	0.146399	0.544	0.458
CHD2	LEPROTL1	0.0164174	0.144326	0.402	0.313
CHD2	LIN7B	0.0165557	0.119088	0.335	0.244
CHD2	GADD45A	0.016842	0.124816	0.69	0.611
CHD2	AGAP1	0.0169053	0.112568	0.293	0.206
CHD2	TMEM256	0.0172501	-0.11787	0.523	0.616
CHD2	FAM107B	0.0172524	0.114349	0.381	0.29
CHD2	MEG3	0.0174968	0.305551	0.423	0.359
CHD2	DUT	0.0176787	0.107213	0.54	0.433
CHD2	ERCC4	0.0177769	0.127113	0.247	0.17
CHD2	PSMC5	0.0179098	0.101827	0.72	0.641
CHD2	FRMD4B	0.0180845	0.116051	0.331	0.244
CHD2	JUND	0.0181386	0.105063	0.515	0.415
CHD2	ENO3	0.0181725	0.154249	0.628	0.542
CHD2	ARHGEF9	0.0183654	0.151704	0.318	0.239
CHD2	PSMC1	0.0183672	-0.129564	0.594	0.631
CHD2	PIGF	0.0184061	0.114124	0.377	0.295
CHD2	GLG1	0.018617	0.131668	0.393	0.308
CHD2	PCBD1	0.0188375	0.125003	0.519	0.42
CHD2	CMC1	0.019212	0.118718	0.431	0.338
CHD2	SNRNP27	0.0193126	0.126461	0.703	0.598
CHD2	STARD3NL	0.0194286	0.11219	0.623	0.514
CHD2	INAFM1	0.0194598	0.142177	0.544	0.468
CHD2	PRRT2	0.0194937	0.110378	0.498	0.392
CHD2	BACE1	0.0197187	-0.105787	0.109	0.173
CHD2	MXRA8	0.0202121	0.105309	0.523	0.399
CHD2	NEUROD4	0.0203244	-0.130845	0.527	0.598
CHD2	ANKRD39	0.0205096	0.111795	0.385	0.29
CHD2	HAX1	0.020581	0.145583	0.594	0.529
CHD2	TRA2A	0.0211213	-0.181895	0.305	0.387
CHD2	CALM3	0.0212075	0.148372	0.816	0.807
CHD2	TUBA4A	0.0216305	0.125355	0.285	0.206
CHD2	LMNA	0.0217475	-0.12205	0.151	0.221
CHD2	PARP1	0.0221767	0.130941	0.828	0.761
CHD2	C19orf25	0.0222723	-0.119274	0.339	0.43
CHD2	EMC7	0.0227796	0.111186	0.531	0.445
CHD2	ARID1A	0.0228971	-0.107826	0.448	0.517
CHD2	GSTM3	0.023024	0.116666	0.448	0.354
CHD2	VAX2	0.0235411	-0.123245	0.276	0.346
CHD2	SOX11	0.0236113	-0.119279	0.925	0.924
CHD2	PDPK1	0.0237955	0.108101	0.347	0.262
CHD2	PTGDS	0.0242823	0.193449	0.452	0.372
CHD2	KPNA1	0.0247766	-0.117775	0.192	0.262
CHD2	SEPT11	0.0248395	0.130839	0.665	0.593
CHD2	NECAP2	0.0250855	-0.145422	0.18	0.244
CHD2	KIAA1109	0.0257376	-0.118046	0.188	0.26
CHD2	SSBP4	0.0259246	0.125664	0.172	0.112
CHD2	UCHL1	0.0261786	0.118344	0.921	0.901
CHD2	NAV1	0.0266416	-0.134952	0.619	0.651
CHD2	TMEM219	0.0267509	-0.108983	0.515	0.58
CHD2	SSR2	0.0269305	0.108029	0.799	0.718
CHD2	KIAA1456	0.0271425	-0.145744	0.238	0.31
CHD2	PARL	0.0274598	-0.151402	0.301	0.366
CHD2	TRAP1	0.027577	0.10143	0.322	0.244
CHD2	TUBB2B	0.0284442	0.123357	0.979	0.944
CHD2	SLC17A6	0.0286003	-0.126387	0.23	0.3
CHD2	SSBP1	0.0292728	0.104839	0.879	0.845
CHD2	CYFIP2	0.0294954	-0.109732	0.126	0.188
CHD2	MED27	0.0299159	-0.119615	0.18	0.249
CHD2	ACTG1	0.0301673	0.141617	0.979	0.987
CHD2	RABIF	0.0301856	0.100645	0.31	0.229
CHD2	GTF2A1	0.0303298	0.102528	0.146	0.092
CHD2	CBY1	0.0312762	-0.112648	0.209	0.28
CHD2	ITM2B	0.0316152	0.109035	0.548	0.481
CHD2	NR3C1	0.0316301	0.1069	0.272	0.201
CHD2	GADD45G	0.0318947	-0.185982	0.322	0.399
CHD2	REEP5	0.0321361	0.113306	0.41	0.331
CHD2	FXYD1	0.0323565	-0.107789	0.117	0.178
CHD2	SF3B5	0.0324592	-0.105276	0.728	0.774
CHD2	PRPF40A	0.0325879	-0.157774	0.64	0.644
CHD2	HSPA5	0.0326239	0.124943	0.423	0.351
CHD2	GOLIM4	0.0328624	-0.137499	0.201	0.27
CHD2	CDC16	0.0331099	-0.113397	0.134	0.196
CHD2	MAX	0.0335568	-0.118208	0.301	0.364
CHD2	NOP56	0.033719	-0.115671	0.418	0.496
CHD2	SLIRP	0.0337386	-0.114945	0.992	0.995
CHD2	STOML2	0.0338426	0.114635	0.628	0.527
CHD2	IGF2BP2	0.0339215	-0.132763	0.531	0.575
CHD2	POLD2	0.033939	-0.119549	0.435	0.491
CHD2	ZNF33A	0.0339793	0.114448	0.318	0.249
CHD2	NIN	0.0347761	-0.109345	0.134	0.196
CHD2	FARSA	0.0349714	-0.11445	0.293	0.356
CHD2	EXOC5	0.03527	0.107008	0.339	0.262
CHD2	TOMM20	0.0357986	0.100689	0.749	0.656
CHD2	DCTN6	0.0360319	-0.104491	0.452	0.509
CHD2	ACAT1	0.0361831	0.100631	0.439	0.359
CHD2	PMPCA	0.0362368	-0.127743	0.222	0.29
CHD2	MRPL20	0.036489	-0.10037	0.795	0.796
CHD2	TOLLIP	0.0369717	-0.128285	0.159	0.216
CHD2	RNF130	0.0389098	-0.102847	0.452	0.511
CHD2	ZNF770	0.03897	-0.108311	0.297	0.364
CHD2	CACFD1	0.0393431	-0.103674	0.067	0.115
CHD2	MIAT	0.0396096	0.10877	0.837	0.809
CHD2	MFSD10	0.0401216	0.114725	0.423	0.346
CHD2	APP	0.0403583	-0.118598	0.582	0.634
CHD2	YWHAG	0.0406874	-0.128655	0.649	0.695
CHD2	MTHFD2	0.0417366	0.115954	0.397	0.321
CHD2	CIZ1	0.0427342	-0.103583	0.192	0.262
CHD2	YIPF4	0.043525	-0.132098	0.393	0.463
CHD2	NES	0.0436675	-0.10983	0.28	0.354
CHD2	DPYSL3	0.0441415	-0.105022	0.146	0.209
CHD2	C1orf53	0.0442008	0.107613	0.356	0.288
CHD2	MED25	0.0442303	-0.104993	0.105	0.155
CHD2	EID1	0.044244	0.101283	0.808	0.725
CHD2	WBP11	0.044805	-0.104284	0.372	0.455
CHD2	AHI1	0.0449295	-0.146463	0.134	0.191
CHD2	FAM57B	0.046276	-0.152989	0.527	0.573
CHD2	FASTK	0.0464011	-0.10121	0.105	0.153
CHD2	RAB21	0.0471754	-0.127678	0.117	0.168
CHD2	LUC7L	0.0480399	-0.141447	0.322	0.382
CHD2	PPP1R7	0.0504414	0.105021	0.444	0.361
CHD2	DCTPP1	0.0504431	0.109411	0.552	0.463
CHD2	RGS16	0.0507143	0.210763	0.285	0.224
CHD2	AP1S2	0.0512423	0.100147	0.452	0.369
CHD2	PFDN6	0.0540315	0.10782	0.561	0.471
CHD2	FLJ37453	0.0547906	0.1276	0.314	0.244
CHD2	CSNK1A1	0.0551343	0.11993	0.707	0.631
CHD2	KDM1A	0.0551904	-0.119929	0.536	0.557
CHD2	TMEM59	0.055294	0.100611	0.674	0.613
CHD2	FAM168B	0.0554935	-0.117363	0.205	0.265
CHD2	IMPDH2	0.0556792	0.109324	0.343	0.28
CHD2	SLC25A4	0.0561401	0.101821	0.594	0.511
CHD2	SRA1	0.0564432	-0.121924	0.448	0.506
CHD2	TMSB4X	0.0572693	0.106306	1	1
CHD2	VPS13A	0.057466	-0.107805	0.126	0.176
CHD2	MEX3A	0.0576092	-0.123665	0.682	0.707
CHD2	USP8	0.0582648	0.1076	0.402	0.321
CHD2	DBN1	0.0585799	-0.13225	0.603	0.621
CHD2	DYNC1H1	0.059139	0.102044	0.841	0.786
CHD2	SELM	0.0602709	0.190707	0.699	0.695
CHD2	CAMLG	0.0603107	-0.12042	0.54	0.575
CHD2	FAM210B	0.0603279	-0.10166	0.318	0.379
CHD2	MSI1	0.060725	-0.160165	0.301	0.351
CHD2	ATP6V1G2	0.0609691	0.126815	0.444	0.387
CHD2	DDX46	0.0616765	-0.120641	0.736	0.738
CHD2	SPON2	0.0617786	0.115131	0.519	0.468
CHD2	LRRC75A	0.0625022	-0.110276	0.088	0.135
CHD2	C4orf3	0.0630873	-0.109546	0.577	0.603
CHD2	RNH1	0.064041	0.107445	0.444	0.382
CHD2	ZC3H6	0.0642742	0.107022	0.389	0.308
CHD2	ENOX1	0.0655843	0.105236	0.226	0.17
CHD2	BTBD7	0.0665884	-0.107475	0.155	0.209
CHD2	MRPS2	0.067485	-0.134057	0.268	0.316
CHD2	MIF	0.0676594	0.119719	0.891	0.814
CHD2	SYP	0.0678409	-0.109979	0.669	0.705
CHD2	CSNK1E	0.0682402	-0.111492	0.548	0.608
CHD2	UBE2L6	0.0683021	-0.111129	0.657	0.687
CHD2	CCDC137	0.0699326	-0.105753	0.222	0.282
CHD2	TNRC6A	0.0718588	-0.149306	0.444	0.478
CHD2	ALG3	0.0724823	-0.125727	0.28	0.328
CHD2	COA6	0.0732093	-0.108363	0.243	0.295
CHD2	SNHG15	0.0744029	-0.130046	0.331	0.392
CHD2	SEC14L1	0.0748352	-0.123011	0.305	0.356
CHD2	SNRPF	0.0751139	-0.108308	0.841	0.83
CHD2	GADD45GIP1	0.0754033	-0.101995	0.845	0.873
CHD2	IGDCC3	0.0781513	-0.103042	0.548	0.588
CHD2	PIAS1	0.0783777	0.100048	0.385	0.321
CHD2	SUPT4H1	0.0801427	-0.10022	0.682	0.733
CHD2	PHGDH	0.0805991	0.117709	0.389	0.328
CHD2	PCBP3	0.0813988	-0.140329	0.318	0.356
CHD2	RANGRF	0.0815742	-0.124128	0.226	0.275
CHD2	RAB6A	0.0820227	-0.102754	0.431	0.478
CHD2	KPNA5	0.083354	-0.135176	0.184	0.229
CHD2	PGRMC2	0.0843373	-0.125215	0.222	0.27
CHD2	UQCRC2	0.0845279	0.107671	0.477	0.43
CHD2	ORAI2	0.0847077	-0.153031	0.439	0.463
CHD2	CMIP	0.0901443	0.100351	0.301	0.242
CHD2	CCDC59	0.0909758	-0.167589	0.351	0.394
CHD2	EEF1A1	0.0922183	-0.108702	0.996	0.992
CHD2	CBFA2T2	0.0924745	-0.131758	0.226	0.275
CHD2	SERPINF1	0.0925162	0.117326	0.46	0.394
CHD2	FNBP4	0.0929036	-0.103616	0.255	0.313
CHD2	LINC00657	0.0931488	-0.148115	0.339	0.384
CHD2	RSL1D1	0.0938754	-0.125459	0.569	0.608
CHD2	NKAIN3	0.0954376	0.109415	0.707	0.659
CHD2	CSTB	0.0957327	-0.132193	0.732	0.743
CHD2	NT5C3B	0.0958033	-0.107117	0.582	0.595
CHD2	FUS	0.0969619	-0.117555	0.766	0.74
CHD2	MARCKSL1	0.0977557	-0.104793	0.87	0.896
CHD2	COIL	0.0996972	-0.119536	0.289	0.351
CHD2	NDUFV3	0.100036	-0.119163	0.494	0.542
CHD2	SMCR5	0.10026	0.113212	0.477	0.417
CHD2	MRPL22	0.101118	-0.13698	0.552	0.593
CHD2	ATXN2	0.101154	-0.103714	0.356	0.405
CHD2	ZFHX4	0.101433	0.102185	0.167	0.125
CHD2	APEX1	0.101584	0.115565	0.69	0.669
CHD2	ZFR	0.102205	-0.104381	0.548	0.588
CHD2	RIIAD1	0.102268	-0.104924	0.134	0.176
CHD2	ATP5F1	0.10285	0.111526	0.745	0.725
CHD2	SKIV2L2	0.103171	-0.104203	0.389	0.438
CHD2	RPUSD3	0.105184	-0.170941	0.381	0.412
CHD2	PEMT	0.106036	-0.11202	0.159	0.204
CHD2	MRPS18A	0.10715	-0.145837	0.335	0.384
CHD2	CNBP	0.108022	-0.127186	0.586	0.613
CHD2	ENC1	0.108229	-0.13138	0.41	0.455
CHD2	MRPS11	0.112231	-0.112097	0.649	0.664
CHD2	COPA	0.112941	-0.121834	0.364	0.41
CHD2	GNG2	0.115153	0.127671	0.389	0.328
CHD2	CDK4	0.115661	-0.105028	0.481	0.504
CHD2	C1orf43	0.116075	-0.101076	0.498	0.529
CHD2	APC2	0.116731	0.110878	0.397	0.344
CHD2	TOX4	0.11695	-0.135724	0.402	0.435
CHD2	CTNNBL1	0.117831	-0.105645	0.218	0.254
CHD2	EWSR1	0.12177	-0.111383	0.527	0.537
CHD2	HNRNPDL	0.123208	-0.118059	0.657	0.677
CHD2	ZNF462	0.130259	-0.107936	0.452	0.483
CHD2	CTNNB1	0.131061	-0.158974	0.573	0.606
CHD2	LINC01420	0.131828	0.105122	0.845	0.786
CHD2	C4orf48	0.132955	0.132026	0.598	0.56
CHD2	TMEM11	0.13297	-0.138216	0.448	0.476
CHD2	MRPL46	0.134355	-0.117601	0.301	0.344
CHD2	ASNSD1	0.135554	-0.117192	0.213	0.249
CHD2	CCAR1	0.136746	-0.1188	0.427	0.453
CHD2	SMARCD1	0.138478	-0.101682	0.573	0.593
CHD2	MMAB	0.140834	-0.10708	0.276	0.31
CHD2	USP7	0.143475	-0.12816	0.163	0.198
CHD2	ENAH	0.14376	0.115573	0.686	0.641
CHD2	RLIM	0.146156	-0.102077	0.167	0.206
CHD2	TMED3	0.146834	-0.104854	0.268	0.3
CHD2	GAL	0.149751	0.184188	0.238	0.204
CHD2	BRD2	0.149924	-0.110336	0.397	0.433
CHD2	WDR82	0.154459	-0.104394	0.36	0.394
CHD2	SNRNP25	0.159907	-0.107139	0.393	0.433
CHD2	AC004540.4	0.16311	-0.11049	0.368	0.394
CHD2	DDX3X	0.165321	-0.1052	0.444	0.458
CHD2	IER2	0.169578	-0.101635	0.385	0.417
CHD2	WBP5	0.171322	-0.111855	0.695	0.684
CHD2	FBXL15	0.178821	-0.106074	0.276	0.313
CHD2	GPM6B	0.180092	-0.111873	0.632	0.636
CHD2	CHCHD6	0.181744	-0.102546	0.192	0.229
CHD2	LRIF1	0.182912	-0.127873	0.301	0.336
CHD2	GRIPAP1	0.188861	-0.112109	0.222	0.257
CHD2	OSBPL9	0.191547	-0.106171	0.238	0.28
CHD2	AP3S1	0.195269	-0.113644	0.502	0.494
CHD2	LSM14A	0.201108	-0.13582	0.272	0.3
CHD2	HNRNPA0	0.203405	-0.116788	0.736	0.692
CHD2	SRSF11	0.211388	-0.1066	0.816	0.814
CHD2	TUBB2A	0.216894	0.107908	0.87	0.868
CHD2	ENDOV	0.23774	-0.125552	0.368	0.397
CHD2	VEZT	0.237907	-0.100053	0.331	0.366
CHD2	EXOSC4	0.239712	-0.123427	0.536	0.542
CHD2	RBM39	0.249268	-0.102059	0.904	0.888
CHD2	CCNB1IP1	0.256072	-0.110215	0.335	0.356
CHD2	GKAP1	0.285413	-0.11226	0.251	0.282
CHD2	KPNA4	0.288948	-0.103357	0.335	0.356
CHD2	TIMM17A	0.292081	-0.108445	0.573	0.601
CHD2	ECHS1	0.299562	-0.114241	0.703	0.702
CHD2	PHLDA1	0.303211	-0.111883	0.527	0.547
CHD2	PTPRS	0.30488	-0.185298	0.506	0.527
CHD2	COX19	0.305362	-0.109009	0.297	0.321
CHD2	ACTC1	0.308411	-0.128636	0.31	0.331
CHD2	C14orf119	0.321156	-0.10595	0.46	0.448
CHD2	IGFBP5	0.330052	0.677108	0.096	0.125
CHD2	SLC4A1AP	0.338231	-0.119187	0.192	0.209
CHD2	PRPF6	0.339208	-0.100721	0.515	0.517
CHD2	SCAF11	0.35892	-0.120849	0.577	0.58
CHD2	SLC35E3	0.371423	-0.112977	0.205	0.221
CHD2	HNRNPH1	0.39488	-0.122316	0.519	0.524
CHD2	CECR2	0.584869	-0.112291	0.243	0.239
CHD2	BICD1	0.63116	-0.119599	0.598	0.57
CHD2	HMGCS1	0.667832	-0.102897	0.423	0.41
Knockdown	Gene	p_val	avg_logFC	pct.1	pct.2
CHD8	Nontargeting-G3-gene	5.16167e-13	-0.179099	0	0.107
CHD8	CHD8-G2-gene	8.23911e-12	0.196148	0.118	0.003
CHD8	GNG3	1.85121e-05	0.207888	0.789	0.684
CHD8	FLOT1	7.7284e-05	0.172894	0.548	0.43
CHD8	CLASP2	8.7369e-05	0.12803	0.219	0.117
CHD8	SLU7	0.000142186	0.168252	0.467	0.356
CHD8	KPNA2	0.000153451	0.163747	0.492	0.379
CHD8	CDC37L1	0.000215564	0.116039	0.222	0.122
CHD8	UQCRC2	0.000279604	0.167492	0.533	0.43
CHD8	MESDC1	0.000366059	0.102545	0.144	0.069
CHD8	AKIRIN1	0.000425274	0.133474	0.381	0.267
CHD8	ZC3H7A	0.000429414	0.133636	0.183	0.099
CHD8	DHX15	0.000613326	0.102252	0.34	0.224
CHD8	STOML2	0.00065885	0.142671	0.639	0.527
CHD8	R3HDM1	0.000668988	0.136019	0.245	0.153
CHD8	CPNE3	0.00079252	0.124578	0.443	0.326
CHD8	PRELID1	0.00096179	0.161665	0.708	0.611
CHD8	ETFB	0.00105088	0.109451	0.63	0.517
CHD8	ATP6V1G1	0.00106881	0.103026	0.944	0.949
CHD8	THSD7A	0.00131162	0.161604	0.462	0.372
CHD8	CACUL1	0.00146329	0.12185	0.437	0.323
CHD8	WHSC1L1	0.00159118	0.147333	0.813	0.779
CHD8	CCNL2	0.00173501	0.11312	0.355	0.247
CHD8	TWF2	0.00193628	0.112357	0.323	0.226
CHD8	TXNL4A	0.00195334	0.119358	0.662	0.542
CHD8	ITGB1BP1	0.00205871	0.120677	0.505	0.392
CHD8	DNAJC8	0.00211645	0.109103	0.783	0.667
CHD8	ADNP	0.00240665	0.134553	0.297	0.209
CHD8	RABIF	0.00253314	0.134556	0.325	0.229
CHD8	DPM1	0.00255781	0.119665	0.398	0.29
CHD8	C18orf8	0.00262329	0.112194	0.372	0.27
CHD8	SMAP1	0.00263451	0.118663	0.452	0.351
CHD8	PLTP	0.00265948	-0.102043	0.159	0.234
CHD8	TNNI1	0.00278171	0.131808	0.299	0.216
CHD8	ACOT7	0.00284051	0.13835	0.551	0.433
CHD8	LY6E	0.0028743	-0.160767	0.46	0.555
CHD8	TMEM170A	0.0030669	0.109312	0.316	0.219
CHD8	THOC7	0.00309113	0.122761	0.733	0.644
CHD8	ZNF160	0.0033372	0.113803	0.239	0.155
CHD8	HSPB1	0.00345102	0.146873	0.563	0.455
CHD8	PCMT1	0.00353544	0.122556	0.585	0.486
CHD8	UTP11L	0.00373615	0.117876	0.546	0.448
CHD8	NDUFA5	0.00375212	0.119568	0.626	0.534
CHD8	ACTL6A	0.00472725	0.102899	0.327	0.242
CHD8	PSMA6	0.00484535	0.105879	0.2	0.13
CHD8	SH3GLB1	0.00495715	0.103522	0.428	0.333
CHD8	MRPS18B	0.00527056	0.10916	0.566	0.466
CHD8	USF2	0.00529706	0.102644	0.282	0.198
CHD8	PALM	0.00532287	0.130257	0.389	0.295
CHD8	CLIC1	0.00558639	0.127333	0.8	0.763
CHD8	ARPC1A	0.00562889	0.106594	0.54	0.438
CHD8	CCT7	0.00576995	0.128449	0.647	0.573
CHD8	HNRNPU	0.00617315	0.102461	0.759	0.674
CHD8	YWHAH	0.00618584	0.134831	0.404	0.328
CHD8	GPS1	0.00621595	0.128888	0.376	0.305
CHD8	DSTYK	0.00636606	-0.138492	0.166	0.234
CHD8	YWHAB	0.00685592	0.101128	0.867	0.814
CHD8	TIMM17B	0.00695308	-0.11759	0.643	0.71
CHD8	BFAR	0.00830177	0.102825	0.31	0.232
CHD8	ILK	0.00834296	0.118633	0.417	0.331
CHD8	PPP2R2A	0.00848841	0.103433	0.368	0.285
CHD8	TXNL1	0.00880275	0.101236	0.613	0.537
CHD8	DVL3	0.00922784	-0.126034	0.241	0.31
CHD8	TMEM50A	0.00925081	0.101763	0.611	0.519
CHD8	IK	0.00934699	0.110484	0.671	0.606
CHD8	CEP290	0.00935189	0.118215	0.477	0.387
CHD8	ACTR10	0.0100745	0.132846	0.434	0.359
CHD8	UBC	0.0101719	0.115702	0.901	0.893
CHD8	CCDC58	0.0111938	0.121601	0.303	0.229
CHD8	TMEM256	0.0116252	-0.109879	0.533	0.616
CHD8	DUT	0.0117359	0.12786	0.505	0.433
CHD8	TERF2IP	0.0119131	0.118558	0.802	0.725
CHD8	ENSA	0.0124915	0.121021	0.503	0.412
CHD8	DNMT3A	0.0130341	0.10595	0.338	0.254
CHD8	PPID	0.0135002	0.10455	0.318	0.247
CHD8	PSMC4	0.0135283	0.102727	0.533	0.44
CHD8	KLHL24	0.0141222	0.117906	0.357	0.285
CHD8	EIF4A3	0.0144151	0.105926	0.495	0.42
CHD8	WRB	0.0145503	0.110115	0.449	0.372
CHD8	KLC1	0.0151847	0.102298	0.735	0.649
CHD8	PPP1R7	0.0157909	0.11927	0.437	0.361
CHD8	TCEAL4	0.0162432	0.112239	0.632	0.529
CHD8	ARL5A	0.0169071	0.10273	0.398	0.321
CHD8	SNRPB	0.0173055	0.117929	0.791	0.761
CHD8	UQCC2	0.0181847	-0.113477	0.652	0.71
CHD8	RTFDC1	0.0195752	0.110226	0.488	0.417
CHD8	GLG1	0.0197607	0.103459	0.383	0.308
CHD8	PUM1	0.0217597	0.107635	0.561	0.486
CHD8	CCT3	0.0220681	0.11822	0.701	0.672
CHD8	KARS	0.0234526	0.102162	0.422	0.351
CHD8	NDUFA3	0.0248711	-0.106453	0.884	0.903
CHD8	THSD7B	0.0262145	0.100668	0.224	0.165
CHD8	ZEB2	0.0274741	-0.123235	0.572	0.603
CHD8	CYSTM1	0.0278032	0.10079	0.492	0.415
CHD8	TUSC3	0.0278109	0.10689	0.473	0.389
CHD8	FKBP1A	0.0291314	0.103002	0.688	0.621
CHD8	CHD8	0.0291629	-0.121442	0.282	0.341
CHD8	RPF1	0.0296319	0.122494	0.4	0.333
CHD8	ARL6IP4	0.0310569	0.101926	0.849	0.804
CHD8	WDR60	0.0318461	-0.120233	0.333	0.384
CHD8	TUBA1A	0.0325009	0.112578	0.996	0.995
CHD8	ZNF385A	0.0331683	0.116702	0.181	0.13
CHD8	ZFAND2A	0.0332008	0.101027	0.292	0.232
CHD8	PEF1	0.0364786	0.106924	0.318	0.26
CHD8	FOXRED1	0.0369197	0.100077	0.198	0.148
CHD8	NHLH1	0.0371797	0.122179	0.854	0.804
CHD8	NEFM	0.0415046	0.124583	0.963	0.954
CHD8	RAB11B	0.0426773	0.10096	0.581	0.527
CHD8	TMX2	0.0437885	0.114106	0.394	0.328
CHD8	DCTN1	0.0445352	0.106193	0.68	0.623
CHD8	NDUFA10	0.0461692	0.100506	0.376	0.318
CHD8	USP22	0.0468465	-0.117381	0.619	0.649
CHD8	YPEL3	0.0486721	0.107847	0.359	0.303
CHD8	PSMD13	0.0491991	0.101707	0.372	0.318
CHD8	RAB21	0.0528902	-0.100847	0.127	0.168
CHD8	CHD7	0.0562412	0.105923	0.697	0.621
CHD8	RNF114	0.05833	0.109711	0.312	0.257
CHD8	NDUFS2	0.0590456	0.11754	0.501	0.435
CHD8	B2M	0.0599454	0.121509	0.645	0.565
CHD8	C4orf48	0.060844	0.123558	0.587	0.56
CHD8	REM2	0.0630407	-0.1012	0.202	0.252
CHD8	STMN4	0.0631763	0.111323	0.727	0.725
CHD8	TNC	0.0745283	0.113006	0.256	0.206
CHD8	PMEL	0.0780235	0.111033	0.361	0.318
CHD8	NUDCD3	0.0803023	-0.117239	0.254	0.29
CHD8	MARCKSL1	0.0869255	0.102751	0.897	0.896
CHD8	PNISR	0.0873052	-0.101389	0.862	0.883
CHD8	COX19	0.0873882	-0.102033	0.28	0.321
CHD8	BEX1	0.0892518	-0.119295	0.346	0.392
CHD8	CST3	0.0951583	0.116662	0.716	0.687
CHD8	S100A6	0.103504	0.112124	0.802	0.758
CHD8	AC090498.1	0.107019	-0.129171	0.374	0.415
CHD8	CTBP1	0.108151	-0.106782	0.372	0.417
CHD8	HIST1H4C	0.108482	-0.108498	0.817	0.837
CHD8	FLJ37453	0.112862	-0.110216	0.209	0.244
CHD8	SON	0.115186	-0.102752	0.916	0.919
CHD8	TRIM44	0.129938	0.10723	0.452	0.412
CHD8	VPS72	0.136974	0.107018	0.557	0.532
CHD8	ARPC5	0.149913	0.101127	0.624	0.583
CHD8	MRPL22	0.16886	-0.104909	0.57	0.593
CHD8	TDG	0.171889	-0.10389	0.695	0.692
CHD8	NEUROD1	0.176766	0.107085	0.976	0.969
CHD8	JUN	0.181977	0.120803	0.471	0.443
CHD8	PHLDA1	0.240114	0.100805	0.572	0.547
CHD8	MRPS18A	0.241963	-0.108284	0.363	0.384
CHD8	CYB5D2	0.274474	0.173668	0.267	0.237
CHD8	GOLIM4	0.275225	-0.113274	0.254	0.27
CHD8	ATF4	0.37421	0.105706	0.71	0.702
CHD8	PTH2	0.539102	0.129008	0.389	0.374
Knockdown	Gene	p_val	avg_logFC	pct.1	pct.2
CTNND2	CTNND2-G2-gene	1.413e-17	0.240976	0.175	0
CTNND2	Nontargeting-G3-gene	8.42077e-07	-0.179099	0	0.107
CTNND2	R3HDM1	0.000108069	0.187673	0.278	0.153
CTNND2	EID2B	0.000913342	-0.118824	0.061	0.153
CTNND2	RHBDL3	0.000990374	0.104235	0.151	0.066
CTNND2	PPP2R2A	0.00100225	0.141911	0.42	0.285
CTNND2	LINC00116	0.00117751	0.207967	0.401	0.285
CTNND2	WHSC1	0.0013372	0.153712	0.274	0.163
CTNND2	CXXC4	0.00140492	0.121448	0.17	0.084
CTNND2	TRABD	0.00175975	0.125117	0.165	0.084
CTNND2	CCNL2	0.00182558	0.129048	0.377	0.247
CTNND2	SCMH1	0.00185175	0.144179	0.127	0.056
CTNND2	HRH2	0.00187314	0.121373	0.123	0.053
CTNND2	RHOC	0.00204911	0.1676	0.642	0.522
CTNND2	CPNE3	0.00236755	0.149594	0.443	0.326
CTNND2	TIMM17B	0.00237442	-0.146408	0.632	0.71
CTNND2	DECR1	0.00267803	-0.136793	0.198	0.318
CTNND2	TCEAL4	0.00303057	0.171914	0.656	0.529
CTNND2	BFAR	0.00394976	0.134773	0.335	0.232
CTNND2	TMEM59	0.00407594	0.176484	0.693	0.613
CTNND2	MRGBP	0.00413825	-0.103233	0.09	0.173
CTNND2	IQCE	0.00428813	-0.104129	0.047	0.117
CTNND2	POLR3D	0.00440385	0.174381	0.34	0.237
CTNND2	PLTP	0.00470345	-0.107904	0.142	0.234
CTNND2	ZNF121	0.00513411	-0.108622	0.061	0.135
CTNND2	NR2F1-AS1	0.00524567	0.103369	0.16	0.084
CTNND2	KIAA1109	0.00526072	-0.126341	0.16	0.26
CTNND2	NOC2L	0.00529022	-0.135762	0.363	0.478
CTNND2	FRG1	0.00542825	0.147355	0.717	0.654
CTNND2	DNAJC18	0.00544159	0.113752	0.307	0.201
CTNND2	MIAT	0.00561632	-0.133236	0.731	0.809
CTNND2	MLLT1	0.00585474	-0.125251	0.08	0.155
CTNND2	RP11-332H14.2	0.00617447	0.107351	0.151	0.079
CTNND2	TBC1D16	0.00622649	0.130634	0.363	0.257
CTNND2	SSBP4	0.00638535	0.121155	0.193	0.112
CTNND2	GNPTG	0.00739721	0.109354	0.203	0.125
CTNND2	CD24	0.00843281	-0.136293	0.849	0.888
CTNND2	PTMS	0.00852914	-0.155335	0.788	0.842
CTNND2	MPHOSPH10	0.00852989	-0.169011	0.354	0.458
CTNND2	BEX4	0.00882569	-0.176619	0.481	0.583
[truncated: 1,645 more rows]
