# Supplementary material for: High-throughput single-cell functional elucidation of neurodevelopmental disease–associated genes reveals convergent mechanisms altering neuronal differentiation
Source: HighWire-hosted journal article supplement (doi:10.1101/gr.262295.120), 2020-09-01
Supplement: Supplemental_Table_S3.xlsx [file Supplemental_Table_S3.xlsx]

## Sheet: Legend
Table S3 Legend
Differentially expressed genes in each set of cells grouped by knock-down condition at the LATE pseudotime stage.
Knockdown	Gene targeted for knockdown
Gene	Differentially expressed gene name
p_val	p value
avg_logFC	average log2 fold change
pct.1	percentage of cells in untargeted population expressing given gene
pct.2	percentage of cells in targeted population expressing given gene

## Sheet: Sup Table 3 Late DE
Knockdown	Gene	p_val	avg_logFC	pct.1	pct.2
ADNP	LHX2	1.75175e-06	0.160552	0.187	0.079
ADNP	C21orf59	1.85453e-06	0.308931	0.873	0.819
ADNP	SNX29	3.59427e-06	0.121865	0.199	0.088
ADNP	KLHL35	1.49182e-05	0.181789	0.285	0.163
ADNP	C10orf35	1.97488e-05	0.184385	0.408	0.277
ADNP	GNG5	2.78141e-05	0.196762	0.845	0.777
ADNP	DBN1	7.0741e-05	0.192126	0.725	0.615
ADNP	SCRN1	9.08628e-05	0.135106	0.373	0.251
ADNP	TSC22D2	0.000100884	0.119929	0.187	0.095
ADNP	EBF3	0.000116597	0.196099	0.712	0.582
ADNP	POU2F2	0.000127366	0.178552	0.832	0.738
ADNP	AK9	0.000135886	0.10197	0.165	0.079
ADNP	UCP2	0.00016358	0.122616	0.187	0.099
ADNP	OLFM1	0.000164291	-0.189621	0.373	0.511
ADNP	MAP1B	0.000242196	0.137532	1	0.998
ADNP	TNNI1	0.000406648	0.205988	0.38	0.278
ADNP	DDHD2	0.000433539	0.126051	0.165	0.088
ADNP	PNMAL2	0.000449528	-0.102969	0.035	0.101
ADNP	FLOT2	0.000461949	0.153458	0.228	0.139
ADNP	MEF2C	0.000482374	0.165756	0.674	0.581
ADNP	HERC2	0.000525484	-0.138615	0.554	0.647
ADNP	CNTN2	0.000925997	0.203342	0.386	0.286
ADNP	DPYSL3	0.000986356	0.169964	0.509	0.397
ADNP	C9orf16	0.000987916	-0.104903	0.984	0.985
ADNP	WDR26	0.00112406	0.129436	0.266	0.174
ADNP	RGS3	0.00129693	0.117415	0.307	0.216
ADNP	MAP4K4	0.00143131	0.117541	0.826	0.764
ADNP	ZFAND2A	0.00146506	0.150229	0.316	0.222
ADNP	GPX3	0.00152055	0.130875	0.161	0.093
ADNP	C1orf54	0.00179561	-0.112359	0.111	0.19
ADNP	DDR1	0.00181783	0.144165	0.323	0.234
ADNP	HDAC2	0.00183706	0.131021	0.858	0.826
ADNP	EIF3J-AS1	0.00184976	-0.117296	0.155	0.245
ADNP	PPP1R1A	0.00202428	0.104382	0.174	0.101
ADNP	MRPS6	0.00216135	0.14495	0.902	0.885
ADNP	RAB4B	0.00221895	0.103187	0.237	0.154
ADNP	NCOA1	0.00250121	0.147057	0.478	0.392
ADNP	RABL2B	0.00259119	0.125819	0.152	0.088
ADNP	RSRC2	0.0028089	0.10764	0.778	0.72
ADNP	CHCHD6	0.00283478	-0.109345	0.155	0.245
ADNP	PSMA7	0.00287856	0.105229	0.949	0.952
ADNP	WDR74	0.00289466	0.115737	0.237	0.156
ADNP	USP42	0.00304122	0.105144	0.174	0.104
ADNP	KIF1B	0.00307464	0.165873	0.56	0.482
ADNP	ANKS3	0.00329284	0.116767	0.389	0.295
ADNP	PCP4	0.00330655	-0.349298	0.07	0.134
ADNP	XRCC5	0.00355912	0.108212	0.782	0.716
ADNP	KRAS	0.00357999	0.10805	0.415	0.317
ADNP	SELM	0.00358546	0.161349	0.699	0.593
ADNP	NDUFB8	0.00359288	0.124389	0.981	0.969
ADNP	USP39	0.00376069	0.1032	0.168	0.103
ADNP	SNHG8	0.00394239	-0.14197	0.506	0.601
ADNP	KATNAL1	0.00423057	0.114602	0.259	0.179
ADNP	MFAP2	0.00423289	0.115118	0.184	0.117
ADNP	PTGDS	0.00523337	0.236828	0.424	0.346
ADNP	MARK4	0.00527232	0.116688	0.206	0.137
ADNP	DAPK1	0.00530493	0.10114	0.136	0.079
ADNP	PPFIA3	0.00539771	0.122201	0.348	0.253
ADNP	LY6H	0.00571711	-0.127429	0.136	0.209
ADNP	PKP4	0.00593349	-0.100929	0.218	0.306
ADNP	AFAP1	0.0060316	0.130395	0.468	0.392
ADNP	SVIP	0.00604631	-0.117332	0.797	0.83
ADNP	SIX1	0.00618104	-0.114228	0.87	0.875
ADNP	GDAP1L1	0.00629415	-0.124593	0.497	0.584
ADNP	ITM2C	0.00640355	0.203517	0.715	0.67
ADNP	SOGA1	0.00641239	0.137264	0.282	0.207
ADNP	CYB5R3	0.00658239	0.123501	0.547	0.467
ADNP	C14orf132	0.00681758	0.114092	0.823	0.78
ADNP	TDG	0.00711258	-0.112372	0.601	0.692
ADNP	GABARAP	0.00712319	0.119578	0.671	0.626
ADNP	NHLH1	0.00719146	0.131138	0.823	0.784
ADNP	PLEKHA1	0.00719494	0.105311	0.266	0.189
ADNP	CABP7	0.00756199	0.105671	0.168	0.108
ADNP	CDC37L1	0.00761416	0.109398	0.215	0.145
ADNP	CDV3	0.00795277	0.100043	0.222	0.152
ADNP	CSNK2B	0.00837605	0.116136	0.69	0.604
ADNP	ACAP3	0.00850789	0.16067	0.453	0.377
ADNP	NDUFAF2	0.00903837	-0.123232	0.19	0.267
ADNP	FBXO9	0.00937637	-0.117123	0.266	0.348
ADNP	CLSTN1	0.00945307	0.147871	0.342	0.262
ADNP	KIAA0319L	0.00946114	0.104795	0.285	0.214
ADNP	CDK5	0.00950115	0.104626	0.443	0.364
ADNP	TP53I11	0.00957344	0.134125	0.649	0.582
ADNP	NEK1	0.00964393	0.103215	0.253	0.185
ADNP	VAV2	0.0101125	0.16825	0.354	0.284
ADNP	HIGD2A	0.0102408	-0.101649	0.756	0.821
ADNP	PFN2	0.010346	0.134281	0.532	0.443
ADNP	APC2	0.01054	0.114025	0.5	0.416
ADNP	MAP3K13	0.0106291	-0.115274	0.772	0.824
ADNP	MEA1	0.0106643	0.102613	0.481	0.39
ADNP	ASIC4	0.0108723	-0.111852	0.383	0.469
ADNP	GPSM1	0.010907	0.100634	0.203	0.139
ADNP	CSK	0.0112838	-0.100668	0.12	0.183
ADNP	SLC5A3	0.0114318	0.114094	0.456	0.353
ADNP	HACD3	0.0115603	0.130417	0.655	0.606
ADNP	ZNF791	0.0116324	-0.110532	0.215	0.288
ADNP	NDFIP1	0.0116333	0.124378	0.56	0.48
ADNP	MEG3	0.0118176	0.321508	0.56	0.54
ADNP	NRXN2	0.0119211	-0.103386	0.136	0.201
ADNP	NARF	0.0119767	0.116295	0.601	0.526
ADNP	CSRP2	0.0122238	0.120445	0.538	0.452
ADNP	PBDC1	0.0123694	0.106402	0.25	0.183
ADNP	CADM1	0.0126154	-0.124986	0.693	0.758
ADNP	RRAGC	0.0126229	0.109157	0.18	0.123
ADNP	BSN	0.0127578	0.10188	0.171	0.114
ADNP	CCDC77	0.0127737	-0.101913	0.085	0.141
ADNP	PGRMC2	0.0130582	0.103578	0.228	0.165
ADNP	RNF7	0.0132539	-0.109732	0.778	0.821
ADNP	CYP20A1	0.0135705	0.106229	0.329	0.258
ADNP	COL6A1	0.0136525	0.11961	0.453	0.388
ADNP	SNRPB	0.0137123	-0.11589	0.677	0.749
ADNP	TCEB3	0.0138626	0.100019	0.342	0.269
ADNP	RBM4	0.0139231	0.104799	0.326	0.258
ADNP	PPP1R14A	0.0144765	0.133978	0.677	0.599
ADNP	CAMLG	0.0145367	-0.102062	0.557	0.628
ADNP	EN1	0.0150841	0.110361	0.335	0.266
ADNP	EEF1B2	0.015113	-0.102681	0.905	0.914
ADNP	RGMB	0.0153354	0.110653	0.592	0.504
ADNP	RNASEH2C	0.0154683	-0.116346	0.453	0.527
ADNP	CRMP1	0.0156384	0.134153	0.759	0.707
ADNP	BRD9	0.0157925	-0.116291	0.241	0.311
ADNP	NCALD	0.0167079	0.103397	0.468	0.394
ADNP	CTNNB1	0.0167989	0.214325	0.655	0.588
ADNP	CHID1	0.0170703	-0.126095	0.212	0.28
ADNP	RNF10	0.0172298	0.127563	0.304	0.236
ADNP	AP3B2	0.0173082	-0.101442	0.082	0.134
ADNP	TNPO2	0.0176797	0.109662	0.332	0.264
ADNP	PSMA2	0.0177956	0.117318	0.68	0.636
ADNP	CDC42	0.0195958	0.104644	0.794	0.777
ADNP	KIAA1549	0.0198815	0.112299	0.278	0.214
ADNP	RNF146	0.0210763	0.106283	0.316	0.255
ADNP	FAM63B	0.0212635	0.102928	0.462	0.385
ADNP	RANBP2	0.0214723	0.131554	0.348	0.284
ADNP	EEF1D	0.0217124	-0.114845	0.525	0.606
ADNP	KPNA3	0.0220947	0.108454	0.316	0.253
ADNP	PRAF2	0.0223583	-0.110609	0.487	0.568
ADNP	SCG2	0.0224844	-0.107511	0.127	0.185
ADNP	PDAP1	0.0226179	0.106014	0.88	0.826
ADNP	R3HDM2	0.0230738	0.125003	0.253	0.19
ADNP	SBNO1	0.02332	0.103221	0.456	0.388
ADNP	RBM15B	0.0235825	0.111103	0.203	0.147
ADNP	ZNHIT3	0.0237159	0.113377	0.655	0.608
ADNP	MARCKS	0.0244682	0.108335	0.937	0.919
ADNP	CHD7	0.0247789	0.103328	0.661	0.612
ADNP	DNAJC2	0.0249263	0.103558	0.266	0.207
ADNP	NLGN2	0.0257742	0.103709	0.193	0.141
ADNP	C14orf1	0.0260733	-0.113759	0.342	0.416
ADNP	PPP3CA	0.0263753	-0.11135	0.244	0.3
ADNP	NME4	0.026484	-0.110583	0.633	0.674
ADNP	FARP1	0.027073	0.108365	0.323	0.256
ADNP	CDK12	0.0283563	0.103085	0.323	0.262
ADNP	SMARCC1	0.0284298	0.103836	0.649	0.582
ADNP	CDC123	0.0287273	0.117364	0.434	0.375
ADNP	NDUFB4	0.0306773	0.101354	0.918	0.91
ADNP	PNMA2	0.0320986	0.100431	0.247	0.187
ADNP	GRK5	0.0322738	-0.10583	0.32	0.385
ADNP	CWC22	0.0323084	0.100531	0.171	0.123
ADNP	PRKX	0.032534	0.100971	0.272	0.212
ADNP	CSNK1E	0.0331167	0.115695	0.674	0.606
ADNP	PPP4R2	0.033576	0.118086	0.506	0.44
ADNP	ATF7IP	0.0337017	-0.100829	0.351	0.412
ADNP	PRPF40A	0.0344179	0.109573	0.608	0.57
ADNP	KMT2A	0.0348561	0.11133	0.671	0.621
ADNP	UBE2V2	0.0348604	-0.101468	0.487	0.537
ADNP	NSMCE1	0.035625	0.106732	0.525	0.465
ADNP	PHIP	0.0358017	0.141984	0.513	0.463
ADNP	SAT2	0.0359335	-0.105417	0.57	0.636
ADNP	NCAM1	0.0360675	0.113716	0.778	0.749
ADNP	ONECUT2	0.0366993	0.123933	0.747	0.701
ADNP	EMX2	0.0368353	0.153763	0.899	0.883
ADNP	ORMDL3	0.0381676	0.113278	0.294	0.236
ADNP	ALCAM	0.0393284	-0.112263	0.25	0.319
ADNP	STRA13	0.0403496	-0.105254	0.513	0.588
ADNP	HSPA5	0.0428465	0.11989	0.386	0.328
ADNP	RAPGEF5	0.0436308	0.106945	0.316	0.256
ADNP	PMEL	0.0466509	0.192488	0.453	0.414
ADNP	CCDC28B	0.0483862	-0.113865	0.693	0.72
ADNP	APBB1	0.0486472	0.100685	0.38	0.317
ADNP	ADH5	0.0493606	0.108433	0.465	0.41
ADNP	UBR2	0.0496292	0.107311	0.206	0.158
ADNP	SMG7	0.0504055	0.106645	0.266	0.207
ADNP	TMX4	0.0510538	0.102788	0.285	0.234
ADNP	CS	0.0510802	0.108041	0.38	0.328
ADNP	AGAP1	0.0528612	0.114261	0.44	0.388
ADNP	NAP1L4	0.0535194	0.106881	0.63	0.592
ADNP	ARHGDIA	0.0605791	0.102727	0.544	0.504
ADNP	MAGED1	0.0613642	0.120112	0.383	0.339
ADNP	ACIN1	0.0617274	-0.107452	0.377	0.44
ADNP	AUTS2	0.0627687	0.103965	0.623	0.581
ADNP	APC	0.0633831	-0.10678	0.608	0.65
ADNP	GYPC	0.064574	0.105716	0.351	0.302
ADNP	TPD52	0.0654757	0.110115	0.361	0.315
ADNP	BAZ2A	0.0722123	0.118252	0.446	0.408
ADNP	ZNF35	0.0744921	-0.107406	0.19	0.238
ADNP	CALD1	0.078965	0.114835	0.63	0.619
ADNP	COX14	0.083068	-0.110433	0.652	0.668
ADNP	DPYSL5	0.0833953	0.100907	0.421	0.379
ADNP	ANK3	0.0849668	0.110391	0.718	0.683
ADNP	CTC-378H22.2	0.0853263	0.121484	0.468	0.434
ADNP	IMMP1L	0.0862007	-0.109673	0.528	0.56
ADNP	H1FX	0.0877623	0.110558	0.339	0.297
ADNP	ITGB1BP1	0.0957785	0.102737	0.44	0.397
ADNP	TRIP12	0.096214	-0.106831	0.304	0.353
ADNP	NR3C1	0.0963983	0.100323	0.133	0.099
ADNP	FAM212B	0.0990263	0.135119	0.332	0.3
ADNP	PTPN11	0.101331	0.105923	0.278	0.234
ADNP	GKAP1	0.106499	-0.124715	0.256	0.293
ADNP	KLHDC3	0.109569	0.103913	0.453	0.399
ADNP	PHC2	0.112117	0.108572	0.288	0.247
ADNP	RCOR2	0.114581	0.120232	0.291	0.253
ADNP	WDFY2	0.125125	0.108557	0.278	0.242
ADNP	ARL6IP5	0.132504	0.104037	0.633	0.632
ADNP	TSPYL4	0.134848	0.105057	0.557	0.509
ADNP	FAM60A	0.144078	-0.104107	0.544	0.582
ADNP	STRBP	0.158219	0.112975	0.396	0.381
ADNP	PEG10	0.168248	0.119358	0.978	0.976
ADNP	SATB1	0.175251	0.107135	0.544	0.538
ADNP	HLA-A	0.216445	0.116347	0.532	0.509
ADNP	PGAM1	0.218836	0.102431	0.611	0.619
ADNP	IGFBP5	0.271677	-0.145279	0.146	0.172
ADNP	SST	0.640788	-0.17683	0.101	0.09
Knockdown	Gene	p_val	avg_logFC	pct.1	pct.2
ARID1B	RP11-110G21.1	8.62728e-06	0.119656	0.114	0.033
ARID1B	GMCL1	5.97773e-05	0.151891	0.175	0.079
ARID1B	NEFM	0.000103301	0.190663	1	1
ARID1B	HSD17B10	0.000573948	-0.162001	0.428	0.568
ARID1B	TNFRSF19	0.000673544	-0.120625	0.114	0.223
ARID1B	TBCK	0.00069124	-0.1444	0.096	0.196
ARID1B	RRAGA	0.000790312	-0.143363	0.249	0.374
ARID1B	RALGDS	0.000979459	-0.126167	0.463	0.595
ARID1B	CACUL1	0.00100125	-0.155714	0.24	0.357
ARID1B	STARD3	0.00103624	0.111491	0.148	0.075
ARID1B	BTN2A2	0.00119465	-0.142281	0.14	0.244
ARID1B	EBF3	0.00119567	0.154238	0.694	0.582
ARID1B	GCK	0.00140743	0.131377	0.231	0.141
ARID1B	IFT57	0.00144379	0.147778	0.332	0.229
ARID1B	KCNIP2	0.00148436	0.144937	0.231	0.145
ARID1B	CDC37L1	0.00184154	0.16178	0.227	0.145
ARID1B	ITGB1BP1	0.0019632	0.165945	0.48	0.397
ARID1B	PDK2	0.0023862	-0.117726	0.179	0.288
ARID1B	TMTC2	0.00253109	0.108666	0.127	0.064
ARID1B	ZNF24	0.00253148	-0.117303	0.218	0.333
ARID1B	MRPL48	0.00266946	0.143179	0.393	0.291
ARID1B	DAG1	0.00269912	-0.105955	0.096	0.181
ARID1B	MED19	0.0027903	0.158454	0.572	0.496
ARID1B	CDC5L	0.00281294	-0.131084	0.275	0.396
ARID1B	DCTN5	0.00281663	-0.120743	0.24	0.348
ARID1B	SEC14L1	0.00340213	-0.115159	0.323	0.456
ARID1B	CCDC88A	0.00353067	-0.140854	0.371	0.504
ARID1B	COL26A1	0.0035743	0.112422	0.162	0.092
ARID1B	TET1	0.00359973	-0.12667	0.349	0.473
ARID1B	NT5DC2	0.00372363	-0.101534	0.192	0.3
ARID1B	PKP4	0.00378186	-0.114334	0.197	0.306
ARID1B	ALG14	0.00393982	-0.100184	0.057	0.126
ARID1B	TULP4	0.00395739	0.155698	0.498	0.399
ARID1B	SKA2	0.00454315	0.160181	0.559	0.482
ARID1B	NEFL	0.00467012	0.15972	0.943	0.978
ARID1B	APBB1	0.00467356	0.151061	0.397	0.317
ARID1B	TLN1	0.00474117	-0.108847	0.083	0.159
ARID1B	DPCD	0.00502387	-0.114292	0.205	0.306
ARID1B	NONO	0.00516716	-0.155105	0.576	0.672
ARID1B	DNAJC1	0.00534072	-0.109852	0.07	0.139
ARID1B	TAOK1	0.00542723	-0.117771	0.314	0.429
ARID1B	DRD2	0.00549072	-0.147419	0.231	0.33
ARID1B	PWP1	0.0056537	-0.15058	0.31	0.416
ARID1B	ZNF814	0.0061851	-0.115059	0.14	0.223
ARID1B	SPIN1	0.0064496	-0.111208	0.157	0.249
ARID1B	KHSRP	0.00647451	-0.106695	0.249	0.366
ARID1B	CTBP2	0.00657616	-0.129648	0.48	0.599
ARID1B	FMNL2	0.00667033	0.152685	0.258	0.181
ARID1B	POM121C	0.00749529	0.115007	0.175	0.11
ARID1B	NREP	0.00808053	0.102984	0.948	0.947
ARID1B	MSMO1	0.00820018	-0.14951	0.279	0.372
ARID1B	PAM	0.00832513	-0.127401	0.175	0.258
ARID1B	CADM1	0.00888652	-0.13447	0.672	0.758
ARID1B	WDR70	0.00932673	-0.121809	0.205	0.3
ARID1B	MTA2	0.0094348	0.162844	0.118	0.064
ARID1B	SEC31A	0.00965928	0.141955	0.306	0.231
ARID1B	CNTN2	0.0105587	0.184783	0.358	0.286
ARID1B	DHX15	0.0105829	-0.122535	0.218	0.308
ARID1B	C9orf142	0.010886	-0.119408	0.288	0.399
ARID1B	SIVA1	0.0109427	-0.10362	0.306	0.41
ARID1B	PLXNA3	0.0117939	-0.115685	0.162	0.238
ARID1B	POLR3A	0.0120584	-0.114033	0.188	0.267
ARID1B	CDC37	0.0121649	-0.126075	0.38	0.476
ARID1B	TBPL1	0.0122846	0.130831	0.376	0.302
ARID1B	PBX1	0.0123927	0.13055	0.668	0.582
ARID1B	ACTR6	0.0125345	-0.113734	0.131	0.207
ARID1B	C1orf35	0.0125422	-0.109648	0.231	0.326
ARID1B	ZZEF1	0.0126238	0.108453	0.127	0.073
ARID1B	YY1	0.0126289	-0.120355	0.336	0.443
ARID1B	RLIM	0.0126997	-0.10231	0.131	0.209
ARID1B	HIPK2	0.0133171	-0.100809	0.188	0.278
ARID1B	RAB3GAP2	0.0133909	-0.140011	0.183	0.264
ARID1B	EXOSC4	0.0135304	-0.161543	0.323	0.394
ARID1B	TTC37	0.0137755	-0.109693	0.432	0.537
ARID1B	SMARCA1	0.0140518	-0.101528	0.258	0.366
ARID1B	RNF219	0.0141902	0.124687	0.323	0.244
ARID1B	RP11-127B20.3	0.0142627	0.106232	0.183	0.121
ARID1B	MAP2K2	0.0146309	-0.104268	0.127	0.2
ARID1B	NAP1L1	0.0146455	0.111807	0.978	0.969
ARID1B	METAP2	0.0150403	0.122188	0.83	0.744
ARID1B	SMURF2	0.0153285	-0.101998	0.096	0.161
ARID1B	GGPS1	0.0156826	-0.103017	0.323	0.41
ARID1B	TSPAN14	0.0165732	-0.10227	0.275	0.379
ARID1B	TPM1	0.0165919	-0.126343	0.686	0.76
ARID1B	TRA2B	0.0174212	-0.113043	0.528	0.65
ARID1B	YPEL3	0.0175784	0.154784	0.472	0.407
ARID1B	GPATCH2L	0.0178735	0.133516	0.445	0.359
ARID1B	FAM127C	0.018243	0.115982	0.24	0.176
ARID1B	NKAIN4	0.0184946	-0.128246	0.45	0.551
ARID1B	HACD3	0.0187544	-0.10777	0.507	0.606
ARID1B	SAT1	0.0189767	0.209251	0.555	0.504
ARID1B	RUFY3	0.0192632	-0.114392	0.707	0.733
ARID1B	EZR	0.0198651	-0.114885	0.52	0.61
ARID1B	CST3	0.0199382	-0.125476	0.721	0.786
ARID1B	CMIP	0.0204042	-0.118203	0.297	0.377
ARID1B	ASNS	0.0204417	-0.124841	0.262	0.341
ARID1B	MARS	0.0216096	-0.117829	0.21	0.284
ARID1B	PTGDS	0.0216792	-0.201076	0.275	0.346
ARID1B	CTNNB1	0.0216868	0.318639	0.642	0.588
ARID1B	JTB	0.0217946	0.128126	0.729	0.701
ARID1B	SNHG8	0.0222795	-0.138769	0.493	0.601
ARID1B	ZNF35	0.0226892	-0.114882	0.162	0.238
ARID1B	SWI5	0.0241939	0.105576	0.323	0.253
ARID1B	YWHAB	0.0247897	-0.10162	0.838	0.877
ARID1B	ETFB	0.0248339	0.1253	0.668	0.634
ARID1B	SNRPE	0.0253679	-0.113475	0.878	0.914
ARID1B	RAB11B	0.0260081	-0.106619	0.502	0.601
ARID1B	RAB4B	0.0262501	0.111605	0.214	0.154
ARID1B	DNAJC8	0.0271708	-0.101693	0.598	0.687
ARID1B	P4HB	0.0272704	-0.103284	0.227	0.306
ARID1B	HRC	0.0275896	-0.10426	0.166	0.236
ARID1B	COPA	0.0276676	-0.153013	0.332	0.407
ARID1B	MAPRE2	0.0300793	0.139666	0.454	0.397
ARID1B	COMMD3	0.0303459	-0.119174	0.472	0.562
ARID1B	RNF220	0.0307333	-0.112879	0.24	0.321
ARID1B	COA3	0.0313092	0.132235	0.686	0.679
ARID1B	FAM195B	0.0325912	0.128936	0.721	0.705
ARID1B	RAE1	0.0337539	0.108464	0.227	0.168
ARID1B	MDGA1	0.0337834	0.100612	0.472	0.407
ARID1B	PTH2	0.0345642	0.205212	0.668	0.623
ARID1B	PEG10	0.034595	0.11315	0.991	0.976
ARID1B	CHURC1	0.0365208	-0.103291	0.402	0.491
ARID1B	GRK5	0.036779	-0.104729	0.293	0.385
ARID1B	ARFGEF1	0.0371372	0.145854	0.271	0.214
ARID1B	LZIC	0.0372746	-0.102226	0.197	0.267
ARID1B	BCL7A	0.0379917	-0.102577	0.655	0.723
ARID1B	MAPT	0.0381598	0.108891	0.258	0.196
ARID1B	CD320	0.0384167	-0.10307	0.24	0.317
ARID1B	PMEL	0.0387119	-0.12647	0.332	0.414
ARID1B	ACAD10	0.0397841	0.124426	0.14	0.093
ARID1B	NCAN	0.0405488	-0.102093	0.271	0.348
ARID1B	C12orf73	0.0407681	0.124371	0.349	0.286
ARID1B	TMEM219	0.0422442	0.113926	0.607	0.544
ARID1B	SSBP3	0.0424628	0.112724	0.773	0.736
ARID1B	KIAA1456	0.0425196	-0.102479	0.341	0.425
ARID1B	CCT7	0.0426832	0.131335	0.546	0.478
ARID1B	GSK3B	0.0429594	-0.100714	0.463	0.54
ARID1B	SNRPC	0.0443388	-0.111025	0.699	0.767
ARID1B	SCAF8	0.0446727	0.102212	0.109	0.07
ARID1B	TRIM2	0.0451876	0.130185	0.598	0.529
ARID1B	XPC	0.0463751	-0.112901	0.214	0.289
ARID1B	NAP1L4	0.0472156	0.128141	0.62	0.592
ARID1B	TXNDC15	0.0494262	0.111523	0.162	0.115
ARID1B	C1orf21	0.0494433	0.124552	0.493	0.452
ARID1B	WASF1	0.0497859	0.123286	0.389	0.321
ARID1B	PSMD14	0.0512812	0.124412	0.559	0.531
ARID1B	UBE2V2	0.0515992	-0.103821	0.472	0.537
ARID1B	YWHAE	0.0520372	0.104496	0.961	0.94
ARID1B	POU3F2	0.0538297	0.125779	0.275	0.22
ARID1B	ATP1B1	0.0546776	0.160414	0.611	0.581
ARID1B	ARPC4	0.0552221	0.114717	0.437	0.377
ARID1B	TMBIM6	0.0558702	-0.116647	0.463	0.526
ARID1B	BRSK1	0.0568134	-0.102119	0.157	0.212
ARID1B	SMIM14	0.0572682	0.110844	0.541	0.491
ARID1B	CLPX	0.0588341	0.116887	0.201	0.156
ARID1B	LANCL2	0.0600574	-0.100444	0.249	0.319
ARID1B	FAM204A	0.0602332	-0.104067	0.389	0.471
ARID1B	SRP72	0.0602531	0.103239	0.402	0.353
ARID1B	ZBTB8OS	0.0604043	-0.115664	0.428	0.489
ARID1B	PLEKHA1	0.0622513	0.126557	0.231	0.189
ARID1B	TMEM107	0.0626797	0.106624	0.271	0.212
ARID1B	ATXN7L3B	0.0633316	0.114827	0.655	0.643
ARID1B	CCER2	0.0635454	-0.101497	0.537	0.614
ARID1B	FIBP	0.0637098	0.120031	0.677	0.639
ARID1B	OARD1	0.0641032	0.100774	0.275	0.222
ARID1B	CAMK2N1	0.0659926	0.106907	0.576	0.516
ARID1B	SET	0.0662362	0.15115	0.856	0.815
ARID1B	FKBP8	0.0670816	0.102954	0.568	0.533
ARID1B	TNPO2	0.0689623	0.11935	0.314	0.264
ARID1B	BCAP31	0.0699443	-0.113752	0.367	0.43
ARID1B	EMX2	0.074201	0.126174	0.895	0.883
ARID1B	PHIP	0.0750222	0.110643	0.533	0.463
ARID1B	BID	0.0752619	-0.107266	0.424	0.498
ARID1B	AP1S2	0.0756957	0.12342	0.441	0.386
ARID1B	MIR4458HG	0.0780146	0.110224	0.297	0.247
ARID1B	BDP1	0.0787242	-0.10266	0.445	0.52
ARID1B	MPHOSPH8	0.0791642	0.100893	0.751	0.74
ARID1B	CTHRC1	0.0792512	0.134578	0.52	0.471
ARID1B	CDH2	0.0800195	0.100985	0.76	0.716
ARID1B	CACNB3	0.0839183	0.109323	0.419	0.366
ARID1B	UPF2	0.0873687	-0.115073	0.576	0.659
ARID1B	VPS36	0.089795	0.116494	0.362	0.313
ARID1B	FSD1L	0.0901868	-0.108441	0.249	0.302
ARID1B	KMT5B	0.0911087	0.105902	0.358	0.311
ARID1B	EIF3G	0.0953016	-0.110419	0.555	0.606
ARID1B	RP4-665J23.1	0.0974076	0.116571	0.345	0.299
ARID1B	APBA2	0.105537	0.108056	0.367	0.313
ARID1B	PSMD11	0.106606	0.115853	0.314	0.278
ARID1B	SLC38A1	0.107118	0.110207	0.528	0.495
ARID1B	CITED2	0.109759	0.133262	0.332	0.293
ARID1B	CYSTM1	0.110852	0.116373	0.485	0.46
ARID1B	MSI2	0.115831	-0.117572	0.594	0.625
ARID1B	CBX3	0.119136	0.111403	0.921	0.888
ARID1B	SYNRG	0.124639	0.108674	0.52	0.48
ARID1B	RNF10	0.124813	0.100049	0.275	0.236
ARID1B	CMPK1	0.128561	0.105159	0.183	0.145
ARID1B	TSC22D1	0.13727	0.105588	0.476	0.456
ARID1B	C21orf59	0.138063	-0.118421	0.803	0.819
ARID1B	LAMTOR2	0.144066	0.106047	0.699	0.654
ARID1B	MAPK10	0.151657	0.121494	0.415	0.379
ARID1B	PTPRS	0.151668	0.200375	0.581	0.56
ARID1B	OTUD6B-AS1	0.157142	0.10477	0.59	0.581
ARID1B	RUVBL2	0.182737	0.109155	0.328	0.302
ARID1B	MPG	0.192474	0.10032	0.38	0.341
ARID1B	GDAP1	0.257803	0.126383	0.332	0.33
ARID1B	PHGDH	0.262166	0.115886	0.336	0.304
ARID1B	DNAAF2	0.286998	0.103227	0.288	0.264
ARID1B	SS18L2	0.296031	0.108221	0.472	0.449
ARID1B	NRDC	0.29882	0.106712	0.489	0.469
ARID1B	BCYRN1	0.362413	-0.12466	0.114	0.139
ARID1B	KNOP1	0.36981	-0.101704	0.585	0.608
ARID1B	PCP4	0.377455	0.124961	0.157	0.134
ARID1B	SOX11	0.382076	0.150827	0.93	0.929
ARID1B	RGS16	0.424458	-0.115867	0.166	0.185
ARID1B	SCOC	0.474508	0.112483	0.402	0.408
Knockdown	Gene	p_val	avg_logFC	pct.1	pct.2
ASH1L	MT-CO2	1.05267e-08	-0.187789	1	1
ASH1L	MT-ND3	7.30889e-08	-0.250607	1	1
ASH1L	MT-CO1	8.07512e-08	-0.231262	1	0.998
ASH1L	MT-ND1	8.28237e-07	0.182619	1	0.993
ASH1L	ASH1L	7.13746e-06	-0.273662	0.132	0.3
ASH1L	FXYD7	9.23542e-06	-0.334565	0.592	0.738
ASH1L	MT-CYB	1.10956e-05	-0.190719	1	0.996
ASH1L	SNCG	7.73189e-05	-0.16928	1	0.996
ASH1L	RNF44	8.15387e-05	0.18506	0.487	0.311
ASH1L	NCS1	0.000203894	0.14115	0.276	0.143
ASH1L	ASL	0.000245079	0.118744	0.191	0.086
ASH1L	OTUB1	0.000252113	0.162028	0.632	0.456
ASH1L	KLHL42	0.000277951	0.194982	0.336	0.2
ASH1L	PUSL1	0.000429273	0.10545	0.132	0.051
ASH1L	DAP3	0.000440051	-0.192057	0.112	0.236
ASH1L	KPNA3	0.00046439	0.171478	0.388	0.253
ASH1L	UQCR11	0.00053744	-0.144091	0.98	0.989
ASH1L	LIFR	0.000757933	0.128768	0.138	0.057
ASH1L	TXNIP	0.000832988	-0.199373	0.276	0.407
ASH1L	RP13-1032I1.7	0.000915345	0.107842	0.125	0.049
ASH1L	MT-ATP6	0.000970319	0.130997	0.993	0.998
ASH1L	PHF3	0.000978342	0.148451	0.428	0.273
ASH1L	NEDD8	0.00119276	-0.165054	0.941	0.945
ASH1L	RP11-658F2.8	0.00153291	0.11616	0.125	0.053
ASH1L	SPTBN4	0.00164728	0.139373	0.184	0.093
ASH1L	FBXO42	0.00172208	0.104119	0.184	0.092
ASH1L	MINA	0.001748	0.127313	0.158	0.075
ASH1L	SYT4	0.00178791	0.176094	0.322	0.196
ASH1L	FAHD2B	0.00181733	0.132847	0.23	0.128
ASH1L	APBA2	0.00185595	0.153572	0.447	0.313
ASH1L	USP39	0.00224407	0.149804	0.191	0.103
ASH1L	SLC4A8	0.00226845	-0.173118	0.25	0.366
ASH1L	RP11-539L10.3	0.00249221	0.131064	0.27	0.161
ASH1L	DFNA5	0.00251274	-0.118249	0.066	0.163
ASH1L	RAB21	0.00254812	0.150037	0.178	0.093
ASH1L	WDR59	0.0025878	0.106091	0.211	0.114
ASH1L	COMMD10	0.00270852	0.118424	0.197	0.106
ASH1L	PCGF6	0.00275196	-0.109988	0.026	0.103
ASH1L	CYB5R3	0.00320342	0.180214	0.572	0.467
ASH1L	MRPL15	0.00323005	0.129351	0.507	0.364
ASH1L	SMC5	0.00330401	0.14017	0.224	0.13
ASH1L	STAP2	0.00341244	0.115242	0.171	0.09
ASH1L	DDX1	0.00343665	-0.185239	0.645	0.766
ASH1L	NDUFAF6	0.00354399	0.117935	0.27	0.163
ASH1L	GYPC	0.00372841	0.282255	0.414	0.302
ASH1L	HIST1H4C	0.00379915	-0.192631	0.829	0.864
ASH1L	ZNF493	0.0040628	-0.189717	0.197	0.299
ASH1L	TP53I11	0.00416359	0.172607	0.684	0.582
ASH1L	CHGB	0.00420202	-0.171042	0.25	0.364
ASH1L	EXD3	0.00425084	0.13092	0.138	0.068
ASH1L	CSNK2B	0.00432981	0.187846	0.73	0.604
ASH1L	SYNGR1	0.00433616	0.101962	0.171	0.09
ASH1L	FAM192A	0.00442983	-0.191489	0.395	0.498
ASH1L	ERCC1	0.00454561	0.125203	0.546	0.421
ASH1L	PAFAH1B3	0.00492957	-0.152955	0.908	0.918
ASH1L	RBMX	0.00527588	-0.137829	0.776	0.863
ASH1L	PHF20L1	0.00560934	-0.156121	0.316	0.425
ASH1L	ZFHX4	0.00566949	0.11026	0.257	0.158
ASH1L	DPYSL5	0.00603196	0.150954	0.507	0.379
ASH1L	PKP4	0.00610203	-0.15165	0.197	0.306
ASH1L	LAPTM4B	0.00641074	0.176572	0.579	0.467
ASH1L	MT-ND2	0.00656839	0.118743	0.993	0.993
ASH1L	PRKAR1A	0.00689111	0.144809	0.566	0.423
ASH1L	GRPEL1	0.00705477	0.112921	0.283	0.181
ASH1L	ZFP91	0.00735762	0.160491	0.283	0.185
ASH1L	ZNF667-AS1	0.00745728	-0.164471	0.717	0.791
ASH1L	SPCS2	0.00753568	0.170657	0.711	0.634
ASH1L	RTF1	0.00771532	-0.149891	0.875	0.923
ASH1L	C2CD2L	0.00789443	0.112041	0.178	0.101
ASH1L	PTMS	0.00791991	-0.125161	0.875	0.905
ASH1L	LINC01420	0.00813702	-0.106424	0.803	0.859
ASH1L	C1orf123	0.00824527	-0.143353	0.217	0.332
ASH1L	DCX	0.00858297	-0.162285	0.855	0.875
ASH1L	FAM118A	0.0089701	0.108985	0.355	0.249
ASH1L	SOGA1	0.00908947	0.123297	0.309	0.207
ASH1L	NLGN2	0.0094425	0.110526	0.23	0.141
ASH1L	ATP5D	0.00993886	0.186128	0.507	0.405
ASH1L	PTPN11	0.0100633	0.111623	0.336	0.234
ASH1L	C3orf70	0.0100681	0.111356	0.257	0.165
ASH1L	SHD	0.0101843	0.16649	0.467	0.363
ASH1L	C21orf59	0.010701	0.238746	0.862	0.819
ASH1L	HSD17B10	0.0107706	-0.165838	0.487	0.568
ASH1L	ZNF302	0.0108282	0.113892	0.322	0.223
ASH1L	CNIH1	0.0113418	0.159147	0.355	0.262
ASH1L	COA5	0.0118842	0.112865	0.336	0.234
ASH1L	RUVBL2	0.0121615	0.103045	0.421	0.302
ASH1L	MORN4	0.0124753	0.108495	0.263	0.17
ASH1L	WDR70	0.0127816	-0.138677	0.204	0.3
ASH1L	AGGF1	0.0131775	0.139482	0.289	0.211
ASH1L	S100A6	0.0132821	0.209458	0.908	0.857
ASH1L	HDGF	0.0133493	0.153612	0.487	0.372
ASH1L	SRPK2	0.0138148	-0.136883	0.605	0.658
ASH1L	UNC13B	0.0139566	0.106784	0.204	0.125
ASH1L	MAZ	0.0140154	0.122138	0.48	0.37
ASH1L	TCEAL7	0.0142288	0.115803	0.842	0.795
ASH1L	EIF5B	0.0142499	-0.135196	0.829	0.874
ASH1L	MRPL22	0.0142754	0.117161	0.553	0.451
ASH1L	CDS2	0.0146161	0.173986	0.434	0.335
ASH1L	BLOC1S1	0.0147146	-0.15798	0.691	0.749
ASH1L	YIPF3	0.0149461	0.129151	0.632	0.562
ASH1L	ERH	0.0149723	-0.105787	0.888	0.938
ASH1L	FAM216A	0.015188	-0.145339	0.257	0.348
ASH1L	LZIC	0.0152881	-0.126756	0.171	0.267
ASH1L	NUB1	0.0153176	-0.114426	0.197	0.291
ASH1L	HMGB3	0.0153724	0.142504	0.507	0.405
ASH1L	ZEB2	0.0154918	-0.152581	0.5	0.57
ASH1L	PNMAL2	0.0156722	-0.107032	0.039	0.101
ASH1L	STAM	0.0157317	0.12894	0.309	0.214
ASH1L	VAV2	0.0165411	0.116413	0.388	0.284
ASH1L	ARL16	0.016743	-0.127847	0.77	0.872
ASH1L	GTF2A2	0.0170467	-0.11666	0.717	0.83
ASH1L	MRPS36	0.0182141	-0.130172	0.632	0.722
ASH1L	RAPGEF6	0.0184826	0.175879	0.441	0.357
ASH1L	NAGK	0.0185079	0.144497	0.342	0.255
ASH1L	ATAT1	0.0185765	0.139867	0.447	0.364
ASH1L	MFNG	0.0186382	0.106447	0.336	0.24
ASH1L	HES6	0.0189645	0.134438	0.23	0.152
ASH1L	C16orf72	0.0191504	0.124049	0.316	0.222
ASH1L	MTA3	0.0191671	-0.113663	0.099	0.174
ASH1L	IKZF4	0.0192464	0.10174	0.158	0.093
ASH1L	FLNB	0.0192872	0.175774	0.467	0.383
ASH1L	TTL	0.0194301	0.137867	0.316	0.216
ASH1L	ITGB1BP1	0.0194447	0.110781	0.48	0.397
ASH1L	DLG4	0.0195716	-0.134662	0.243	0.335
ASH1L	TUSC3	0.0196409	0.147795	0.572	0.46
ASH1L	RCOR2	0.0200033	0.157069	0.342	0.253
ASH1L	STK4	0.0200702	-0.131953	0.164	0.244
ASH1L	MRPL17	0.0211849	0.126869	0.303	0.214
ASH1L	ZNHIT6	0.0213319	-0.144191	0.197	0.286
ASH1L	GOLGA2	0.0216728	-0.16471	0.289	0.366
ASH1L	ASNS	0.0216838	-0.170494	0.263	0.341
ASH1L	RHBDL3	0.0217321	0.130617	0.191	0.119
ASH1L	SLC50A1	0.0217745	0.102898	0.184	0.115
ASH1L	RBM3	0.0218971	0.11034	0.579	0.487
ASH1L	PPP1R8	0.0219412	-0.132371	0.184	0.264
ASH1L	FDX1	0.022076	-0.142041	0.151	0.227
ASH1L	PITPNM1	0.0221597	0.111988	0.224	0.147
ASH1L	SERPINF1	0.0222245	0.108979	0.454	0.353
ASH1L	USP14	0.0225475	0.155311	0.434	0.33
ASH1L	MRS2	0.0228356	0.130101	0.211	0.136
ASH1L	C12orf43	0.0230853	0.112937	0.289	0.198
ASH1L	ZNF830	0.0236352	-0.115035	0.112	0.189
ASH1L	STARD10	0.0237534	0.126687	0.204	0.134
ASH1L	COX14	0.0239455	-0.171779	0.618	0.668
ASH1L	YIPF1	0.0243632	0.109636	0.204	0.128
ASH1L	POLR2J3	0.0243982	-0.120881	0.599	0.69
ASH1L	RAB31	0.0246494	-0.104442	0.697	0.817
ASH1L	GADD45G	0.0250545	-0.119462	0.158	0.236
ASH1L	RRAGA	0.0251676	-0.104956	0.283	0.374
ASH1L	MORF4L2	0.0252211	0.135019	0.691	0.597
ASH1L	SMARCD1	0.0252329	-0.152514	0.52	0.615
ASH1L	ZC3H15	0.0263934	-0.133964	0.743	0.78
ASH1L	SLC35B1	0.0265564	-0.121723	0.243	0.333
ASH1L	CHD2	0.0266706	-0.142516	0.276	0.368
ASH1L	SRL	0.0269567	0.107138	0.237	0.161
ASH1L	MCTS1	0.02697	0.12918	0.783	0.755
ASH1L	LGI4	0.0272455	-0.164272	0.276	0.359
ASH1L	PSMA2	0.0276281	0.105884	0.671	0.636
ASH1L	NELFE	0.02769	-0.159176	0.355	0.43
ASH1L	MED17	0.0281068	-0.123241	0.178	0.256
ASH1L	SLK	0.0285571	0.108452	0.303	0.216
ASH1L	PPHLN1	0.0287486	0.118553	0.467	0.37
ASH1L	ZDHHC14	0.0288186	0.114523	0.217	0.145
ASH1L	FBXO21	0.0291123	-0.135673	0.237	0.33
ASH1L	KIF5A	0.029616	-0.128976	0.289	0.388
ASH1L	KIAA1456	0.0303111	-0.149947	0.342	0.425
ASH1L	BCLAF1	0.030541	-0.15583	0.572	0.65
ASH1L	PIK3R3	0.0306662	-0.133858	0.303	0.386
ASH1L	FAM204A	0.030708	-0.112333	0.375	0.471
ASH1L	FXYD1	0.0307164	0.106138	0.263	0.183
ASH1L	RAB11B-AS1	0.030731	-0.113867	0.118	0.189
ASH1L	SUPT20H	0.0307513	-0.160901	0.211	0.284
ASH1L	SNRPE	0.0310211	-0.117644	0.901	0.914
ASH1L	NME1	0.0312666	-0.13923	0.829	0.866
ASH1L	ARPC3	0.0319281	-0.108321	0.77	0.833
ASH1L	HID1	0.0322637	0.103582	0.243	0.167
ASH1L	PFN1	0.0322695	-0.127248	0.928	0.987
ASH1L	C9orf142	0.0325786	-0.134846	0.316	0.399
ASH1L	GTF2F1	0.0327109	-0.188545	0.362	0.423
ASH1L	BEX2	0.0342404	-0.121285	0.868	0.912
ASH1L	IRGQ	0.0342942	0.101111	0.388	0.297
ASH1L	HMGA1	0.0344417	0.118179	0.73	0.681
ASH1L	NOC2L	0.0346975	-0.149637	0.368	0.449
ASH1L	COPG1	0.0350279	0.101949	0.23	0.156
ASH1L	RAP1GDS1	0.0359093	-0.130933	0.191	0.271
ASH1L	ARPC5	0.0359213	0.113715	0.704	0.61
ASH1L	GNAI3	0.0359928	0.118957	0.454	0.357
ASH1L	CADM1	0.0366865	-0.106412	0.73	0.758
ASH1L	VEZT	0.0367444	-0.151551	0.388	0.456
ASH1L	NHLH1	0.0368113	0.140125	0.855	0.784
ASH1L	LYRM2	0.0374525	-0.127898	0.421	0.511
ASH1L	PSMD3	0.0375801	0.120754	0.362	0.278
ASH1L	MZT1	0.0378664	0.120056	0.329	0.247
ASH1L	NIPBL	0.0379191	0.123508	0.513	0.425
ASH1L	ZNF264	0.0379742	0.112198	0.151	0.093
ASH1L	SF3B2	0.0381273	-0.108516	0.645	0.689
ASH1L	HSP90B1	0.0382482	-0.148426	0.461	0.542
ASH1L	SFPQ	0.0385096	-0.143293	0.625	0.656
ASH1L	WDR83OS	0.0386409	-0.126314	0.849	0.912
ASH1L	BRMS1	0.0391619	0.102337	0.362	0.267
ASH1L	SNF8	0.0397798	-0.122639	0.651	0.714
ASH1L	PSME3	0.0402522	-0.130174	0.191	0.262
ASH1L	CCDC124	0.0404483	0.140566	0.605	0.515
ASH1L	SMC3	0.0408279	-0.112494	0.645	0.711
ASH1L	TOP2B	0.041075	-0.132738	0.408	0.476
ASH1L	KIAA1586	0.0412676	-0.11169	0.211	0.289
ASH1L	PTEN	0.041309	0.117394	0.118	0.071
ASH1L	CDV3	0.0421166	0.116653	0.217	0.152
ASH1L	TMEM230	0.0425765	0.108143	0.572	0.476
ASH1L	HEXA	0.0431865	0.106816	0.224	0.158
ASH1L	TCP10L	0.0435936	0.159348	0.441	0.372
ASH1L	NHSL1	0.043669	-0.10688	0.25	0.339
ASH1L	LARP1B	0.0436698	0.13076	0.191	0.126
ASH1L	CHCHD6	0.043847	-0.136671	0.178	0.245
ASH1L	FKBP4	0.0448563	0.113271	0.388	0.308
ASH1L	SAMD4B	0.0453386	0.118336	0.316	0.234
ASH1L	NPEPPS	0.0454942	0.117426	0.434	0.346
ASH1L	CELF4	0.0458483	-0.109475	0.789	0.855
ASH1L	IREB2	0.0466269	-0.11711	0.178	0.249
ASH1L	DNMT3A	0.0466493	0.114136	0.421	0.335
ASH1L	SORBS2	0.0469869	-0.11606	0.474	0.555
ASH1L	DNAJC19	0.0470387	0.133222	0.572	0.482
ASH1L	THUMPD3-AS1	0.0474469	0.122006	0.868	0.802
ASH1L	CD276	0.0478242	0.135136	0.263	0.192
ASH1L	TGS1	0.0480998	-0.134717	0.211	0.284
ASH1L	MORN2	0.0484551	-0.128304	0.263	0.339
ASH1L	HIPK2	0.0491475	0.104783	0.362	0.278
ASH1L	CDKN1B	0.0493986	0.100897	0.263	0.192
ASH1L	LANCL2	0.0494756	-0.147446	0.25	0.319
ASH1L	FAM212B	0.0499718	0.113142	0.382	0.3
ASH1L	ADSL	0.050007	-0.115864	0.171	0.238
ASH1L	CBLB	0.0510863	-0.135363	0.145	0.209
ASH1L	IGBP1	0.0515393	0.1017	0.421	0.341
ASH1L	WRB	0.0517921	0.142174	0.487	0.425
ASH1L	TSEN34	0.051822	0.124041	0.5	0.438
ASH1L	CTB-31O20.2	0.0524531	0.101005	0.158	0.104
ASH1L	SRGAP2B	0.0528044	-0.111499	0.191	0.253
ASH1L	DCTN2	0.053242	0.116823	0.651	0.57
ASH1L	H2AFV	0.0533996	0.106887	0.592	0.509
ASH1L	BCYRN1	0.0534192	-0.106457	0.079	0.139
ASH1L	OSBPL9	0.0535374	-0.118156	0.211	0.282
ASH1L	ZFAND5	0.0535927	0.132634	0.461	0.374
ASH1L	GNAS	0.0551723	0.102829	0.928	0.868
ASH1L	LINC00680	0.0552223	-0.122293	0.079	0.13
ASH1L	CHMP4B	0.0556044	0.110932	0.414	0.335
ASH1L	H1FX	0.0556661	0.114969	0.375	0.297
ASH1L	RRP15	0.0556849	-0.167792	0.217	0.273
ASH1L	BMPR2	0.0557657	0.12676	0.349	0.267
ASH1L	AC090498.1	0.0561845	0.140925	0.362	0.291
ASH1L	DPCD	0.0562079	-0.135892	0.243	0.306
ASH1L	NAV1	0.0569077	0.176825	0.776	0.687
ASH1L	TBCD	0.0573855	0.134468	0.171	0.114
ASH1L	STX1A	0.0576734	0.155863	0.355	0.288
ASH1L	RASGRP2	0.0584892	-0.102843	0.132	0.196
ASH1L	TSC22D1	0.0587419	-0.117657	0.388	0.456
ASH1L	NOS1AP	0.0592209	-0.119375	0.112	0.172
ASH1L	ADAM10	0.0604969	0.108897	0.204	0.143
ASH1L	GOPC	0.0607426	0.127433	0.461	0.37
ASH1L	GEMIN2	0.0611124	0.107302	0.197	0.136
ASH1L	LTA4H	0.0622403	0.122305	0.25	0.179
ASH1L	PSMA3-AS1	0.0630766	-0.109602	0.368	0.432
ASH1L	PPID	0.0636751	0.111399	0.289	0.225
ASH1L	ZNF37A	0.0639381	0.109085	0.355	0.278
ASH1L	MAB21L1	0.0650439	-0.12373	0.526	0.593
ASH1L	ACAP3	0.065377	0.118314	0.467	0.377
ASH1L	PIN1	0.0654679	-0.10393	0.914	0.885
ASH1L	FABP3	0.0667041	0.115888	0.579	0.507
ASH1L	FIS1	0.0670428	0.107074	0.75	0.668
ASH1L	PMEL	0.0680872	0.118921	0.487	0.414
ASH1L	LSS	0.0683573	0.125243	0.303	0.231
ASH1L	PITPNA-AS1	0.0685053	0.10502	0.283	0.211
ASH1L	C11orf31	0.0686506	-0.102164	0.803	0.832
ASH1L	MARS	0.068793	-0.130336	0.23	0.284
ASH1L	RTN3	0.0692374	0.122639	0.645	0.59
ASH1L	SERP2	0.0697564	-0.148654	0.375	0.427
ASH1L	HMP19	0.0707069	-0.110236	0.164	0.225
ASH1L	TFDP2	0.0712232	-0.116426	0.651	0.718
ASH1L	HNRNPH1	0.0723717	0.135899	0.586	0.511
ASH1L	TMEM41B	0.0747904	-0.120835	0.171	0.229
ASH1L	PCM1	0.0749788	-0.111384	0.651	0.69
ASH1L	FADS2	0.0751768	0.116561	0.612	0.533
ASH1L	IDH3G	0.0753897	0.14972	0.414	0.35
ASH1L	RSBN1L	0.0791573	-0.116053	0.618	0.681
ASH1L	BACH2	0.0794823	0.11613	0.217	0.163
ASH1L	RWDD1	0.0796007	-0.101512	0.664	0.712
ASH1L	GREB1	0.0799421	-0.113795	0.204	0.267
ASH1L	CTTN	0.0815621	-0.106826	0.243	0.313
ASH1L	AIG1	0.0817227	0.104828	0.257	0.196
ASH1L	CPNE1	0.0827599	-0.103149	0.342	0.397
ASH1L	EPB41L4A-AS1	0.083132	-0.145531	0.52	0.549
ASH1L	UPF2	0.0833415	-0.11809	0.599	0.659
ASH1L	SPCS1	0.0834278	-0.133344	0.658	0.703
ASH1L	CAND1	0.0835911	0.12196	0.487	0.401
ASH1L	DNAAF2	0.0842085	0.102712	0.329	0.264
ASH1L	NMT1	0.0846449	-0.129831	0.671	0.689
ASH1L	ARL3	0.0858452	0.109167	0.757	0.667
ASH1L	NT5C	0.0870944	0.100561	0.303	0.242
ASH1L	HERPUD1	0.0881636	0.133786	0.322	0.256
ASH1L	RBFOX3	0.08842	-0.104863	0.158	0.211
ASH1L	ORC3	0.0889705	0.107229	0.178	0.126
ASH1L	MIER1	0.0892929	0.122958	0.276	0.22
ASH1L	SRP9	0.0895699	0.116702	0.704	0.628
ASH1L	PTPRF	0.0896943	-0.11972	0.454	0.531
ASH1L	TUBB2A	0.0906692	0.107399	0.921	0.905
ASH1L	NCAN	0.0920705	-0.110396	0.303	0.348
ASH1L	UPF3B	0.0924412	-0.118486	0.408	0.46
ASH1L	PDDC1	0.0926187	-0.138348	0.178	0.223
ASH1L	HPCA	0.0928997	0.146915	0.447	0.379
ASH1L	MRPL44	0.09373	-0.111008	0.211	0.266
ASH1L	SREK1	0.0946832	0.108758	0.434	0.361
ASH1L	LINC00467	0.094811	-0.117265	0.257	0.322
ASH1L	ACSL3	0.0963667	0.114083	0.559	0.458
ASH1L	CDC123	0.0964228	0.10673	0.441	0.375
ASH1L	CCT7	0.0966818	0.104464	0.553	0.478
ASH1L	ARL6IP5	0.0977613	0.135216	0.678	0.632
ASH1L	KIF5B	0.0979095	-0.104725	0.533	0.575
ASH1L	MYO6	0.0979657	0.105971	0.493	0.434
ASH1L	CNOT2	0.0986902	0.114141	0.375	0.31
ASH1L	ARV1	0.0997167	0.101524	0.23	0.176
ASH1L	RTN4RL2	0.100841	-0.11221	0.276	0.332
ASH1L	REV1	0.102639	0.116446	0.224	0.168
ASH1L	NRCAM	0.104116	-0.110536	0.289	0.348
ASH1L	SUGT1	0.104633	-0.113952	0.355	0.419
ASH1L	HMOX2	0.10681	-0.115642	0.303	0.355
ASH1L	TIMM17B	0.107884	-0.100888	0.678	0.689
ASH1L	TM2D3	0.107889	0.118323	0.461	0.399
ASH1L	MDM4	0.108575	0.10869	0.257	0.194
ASH1L	SCHIP1	0.10987	-0.1099	0.138	0.189
ASH1L	ZDHHC16	0.111577	-0.102732	0.217	0.271
ASH1L	SCAPER	0.111661	-0.100036	0.237	0.297
ASH1L	DCTN4	0.111953	-0.125417	0.171	0.22
ASH1L	SUMO1	0.112382	0.108657	0.697	0.689
ASH1L	PCDH17	0.113523	0.10575	0.513	0.44
ASH1L	PPP2R5C	0.11394	0.112468	0.283	0.229
ASH1L	KC6	0.114974	-0.122321	0.421	0.451
ASH1L	WASL	0.115422	0.121059	0.296	0.242
ASH1L	EPB41	0.115683	0.104631	0.671	0.593
ASH1L	TPR	0.116169	-0.109191	0.651	0.663
ASH1L	PGM2L1	0.116727	-0.103764	0.48	0.551
ASH1L	AGPAT1	0.119206	0.103969	0.474	0.401
ASH1L	MAPKAP1	0.12088	-0.112228	0.171	0.22
ASH1L	UNCX	0.122954	0.130016	0.283	0.223
ASH1L	MRPS12	0.124003	-0.119842	0.382	0.425
ASH1L	VIMP	0.12471	-0.127214	0.487	0.507
ASH1L	RNF38	0.124813	0.111021	0.237	0.189
ASH1L	EIF3E	0.12537	0.140596	0.697	0.658
ASH1L	CHID1	0.125473	-0.106944	0.23	0.28
ASH1L	ZZZ3	0.127221	-0.114337	0.132	0.176
ASH1L	PPP2R4	0.130142	0.107205	0.316	0.262
ASH1L	SEPT9	0.13075	0.121397	0.447	0.383
ASH1L	NUMA1	0.131821	0.125648	0.368	0.304
ASH1L	MAPRE2	0.133278	0.112229	0.467	0.397
ASH1L	DDT	0.135963	-0.11266	0.559	0.608
ASH1L	COMMD3	0.136268	-0.10143	0.52	0.562
ASH1L	TLE4	0.138892	0.101167	0.618	0.551
ASH1L	UFC1	0.139365	-0.115162	0.526	0.573
ASH1L	PAFAH1B1	0.139839	-0.111309	0.671	0.694
ASH1L	PWAR6	0.140492	0.102363	0.224	0.178
ASH1L	C19orf70	0.141369	0.104773	0.513	0.456
ASH1L	ARID4A	0.141586	-0.107741	0.618	0.643
ASH1L	DNAJC8	0.145204	-0.123122	0.704	0.687
ASH1L	PCGF3	0.145227	-0.100594	0.197	0.244
ASH1L	AGRN	0.145989	0.123044	0.25	0.198
ASH1L	C18orf8	0.146137	0.127335	0.507	0.454
ASH1L	NEUROG1	0.146364	0.102449	0.171	0.126
ASH1L	ALKBH7	0.14665	0.116068	0.757	0.722
ASH1L	CLNS1A	0.147066	0.112389	0.395	0.346
ASH1L	FAM96B	0.14846	-0.123519	0.829	0.859
ASH1L	SCO1	0.148503	-0.100167	0.145	0.187
ASH1L	IQCK	0.154071	0.100928	0.23	0.181
ASH1L	ASIC1	0.155004	0.169762	0.211	0.161
ASH1L	MFAP4	0.155776	-0.101116	0.178	0.225
ASH1L	IFT22	0.156512	-0.101847	0.309	0.35
ASH1L	RBM10	0.157175	-0.116085	0.217	0.256
ASH1L	EBF2	0.158311	-0.118406	0.204	0.247
ASH1L	SMAD2	0.161502	-0.105642	0.224	0.264
ASH1L	IGFBP5	0.162172	-0.17701	0.125	0.172
ASH1L	KIF1B	0.164537	0.193191	0.507	0.482
ASH1L	MRPL32	0.165002	-0.114418	0.559	0.608
ASH1L	ADD1	0.168568	0.103485	0.401	0.33
ASH1L	NEUROD1	0.172836	0.103882	0.921	0.925
ASH1L	SUPT6H	0.172997	-0.109049	0.329	0.364
ASH1L	CDC37	0.173054	-0.106923	0.454	0.476
ASH1L	BEX1	0.173512	0.168203	0.454	0.405
ASH1L	CWC15	0.173687	0.108316	0.645	0.584
ASH1L	ZIC4	0.173712	-0.134296	0.493	0.531
ASH1L	USP3	0.174163	0.114002	0.342	0.297
ASH1L	CSDE1	0.175869	0.101838	0.77	0.734
ASH1L	SLC25A3	0.178056	0.103524	0.842	0.764
ASH1L	SNAPIN	0.178697	0.109854	0.428	0.364
ASH1L	GLRX5	0.179444	0.114341	0.191	0.152
ASH1L	AIDA	0.181093	0.130034	0.303	0.26
ASH1L	PPP2R5E	0.18249	-0.107444	0.349	0.377
ASH1L	GRK5	0.184447	-0.119101	0.349	0.385
ASH1L	YAF2	0.188122	-0.112702	0.454	0.493
ASH1L	PSMD7	0.188236	0.101222	0.566	0.511
ASH1L	ISCA1	0.188747	-0.105975	0.395	0.429
ASH1L	MESDC2	0.191885	-0.111234	0.283	0.319
ASH1L	TUSC2	0.192044	0.115404	0.428	0.383
ASH1L	DPF3	0.192091	-0.132086	0.224	0.26
ASH1L	GIGYF2	0.196884	0.102001	0.375	0.306
ASH1L	EFNA5	0.199741	0.114201	0.355	0.299
ASH1L	POLR2B	0.201479	-0.107959	0.461	0.509
ASH1L	HMGN3	0.205576	0.113065	0.664	0.597
ASH1L	ATP1B1	0.205662	0.103379	0.599	0.581
ASH1L	ISCU	0.21114	0.106493	0.678	0.612
ASH1L	SKA2	0.213517	-0.10105	0.447	0.482
ASH1L	BCKDK	0.218699	0.105783	0.211	0.172
ASH1L	GADD45A	0.218807	0.101978	0.658	0.606
ASH1L	PPP1R2	0.219338	-0.100896	0.349	0.37
ASH1L	ENAH	0.230542	0.107604	0.763	0.679
ASH1L	CARHSP1	0.231721	-0.119696	0.711	0.729
ASH1L	CPNE3	0.236021	-0.128699	0.441	0.46
ASH1L	FARP1	0.23655	0.121144	0.316	0.256
ASH1L	CFAP36	0.237058	0.11119	0.395	0.359
ASH1L	CALD1	0.242453	0.13826	0.664	0.619
ASH1L	TNPO2	0.24476	0.115652	0.309	0.264
ASH1L	MANF	0.249632	-0.109783	0.493	0.509
ASH1L	B3GAT3	0.254175	-0.10134	0.243	0.277
ASH1L	CITED2	0.255821	0.109548	0.342	0.293
ASH1L	C11orf1	0.256271	-0.111315	0.296	0.319
ASH1L	UGGT1	0.263998	0.115725	0.158	0.126
ASH1L	CGGBP1	0.265808	-0.100285	0.336	0.353
ASH1L	HOOK2	0.275279	-0.104414	0.237	0.269
ASH1L	ING4	0.305253	-0.100908	0.414	0.438
ASH1L	REEP1	0.307331	0.104784	0.355	0.315
ASH1L	ETV1	0.309996	0.120932	0.862	0.857
ASH1L	YPEL5	0.311554	-0.10796	0.303	0.317
ASH1L	ZC3H14	0.312011	-0.106066	0.211	0.236
ASH1L	RCN2	0.317044	0.112159	0.428	0.392
ASH1L	NCAM1	0.319891	0.134079	0.757	0.749
ASH1L	ZNF35	0.322884	-0.112875	0.217	0.238
ASH1L	PCP4	0.322906	-0.178401	0.105	0.134
ASH1L	LCOR	0.346047	-0.120222	0.467	0.46
ASH1L	ID2	0.352493	0.170294	0.243	0.222
ASH1L	APOA1BP	0.376823	0.104471	0.382	0.346
ASH1L	MEG3	0.400615	0.182423	0.533	0.54
ASH1L	CRABP2	0.453167	0.104449	0.546	0.505
ASH1L	TRA2A	0.482092	0.103017	0.428	0.405
ASH1L	CNTN2	0.527085	0.148386	0.303	0.286
ASH1L	SOX11	0.537198	0.149585	0.941	0.929
ASH1L	PTGDS	0.581997	0.113733	0.375	0.346
ASH1L	ACACA	0.671373	0.108416	0.145	0.136
ASH1L	CTNNB1	0.86061	0.135287	0.618	0.588
ASH1L	NKAIN1	0.919798	0.108017	0.388	0.394
ASH1L	EMX2	0.928178	0.142049	0.855	0.883
ASH1L	CLASP2	0.983215	0.110267	0.316	0.328
Knockdown	Gene	p_val	avg_logFC	pct.1	pct.2
CHD2	CHD2	1.74379e-10	-0.348718	0.125	0.368
CHD2	HN1	2.42146e-07	-0.218968	0.984	0.971
CHD2	NEFL	4.13613e-07	-0.242868	0.932	0.978
CHD2	H3F3B	7.57584e-07	-0.159487	1	0.998
CHD2	STMN2	5.26863e-06	-0.119728	1	1
CHD2	STMN1	8.4973e-06	-0.132832	1	1
CHD2	UQCR10	1.10175e-05	0.160097	0.995	0.987
CHD2	SMG5	1.89501e-05	0.142674	0.125	0.04
CHD2	CNTN2	2.81863e-05	0.338309	0.432	0.286
CHD2	CTC-340A15.2	3.71088e-05	-0.172782	0.12	0.267
CHD2	DPYSL5	4.56729e-05	0.218102	0.521	0.379
CHD2	NGFRAP1	5.04844e-05	-0.135894	1	0.996
CHD2	MORF4L2	5.29607e-05	-0.240935	0.432	0.597
CHD2	GNG3	6.11234e-05	0.208461	0.953	0.943
CHD2	LARS	0.000137397	0.219395	0.729	0.614
CHD2	DOPEY1	0.000141239	0.133766	0.151	0.062
CHD2	RAB6B	0.000153241	0.243013	0.536	0.441
CHD2	CD24	0.000153913	-0.166882	0.927	0.952
CHD2	C21orf59	0.000166605	0.313093	0.844	0.819
CHD2	SMC5	0.000177777	0.173592	0.24	0.13
CHD2	LINC01088	0.000257959	0.16761	0.156	0.07
CHD2	NDUFB8	0.000379769	0.140152	1	0.969
CHD2	EEF2	0.000484384	-0.168449	0.906	0.936
CHD2	IAH1	0.000485003	0.156331	0.286	0.174
CHD2	ST13	0.00050045	-0.155192	0.734	0.841
CHD2	GPRIN3	0.0006042	-0.148875	0.849	0.875
CHD2	POU2F2	0.000615522	0.201802	0.792	0.738
CHD2	ID4	0.000700013	-0.108478	0.068	0.168
CHD2	C1orf52	0.00070084	-0.177607	0.234	0.359
CHD2	ZFHX4	0.000781479	0.175274	0.26	0.158
CHD2	ALKBH7	0.000793979	0.140925	0.812	0.722
CHD2	LTBP4	0.000999745	0.10479	0.156	0.075
CHD2	DISP2	0.00105587	-0.132865	0.12	0.234
CHD2	FXYD6	0.00112356	-0.191075	0.589	0.705
CHD2	BAHCC1	0.00129633	0.206931	0.349	0.238
CHD2	MFHAS1	0.00131146	0.101808	0.13	0.059
CHD2	PDCD5	0.00148506	0.192118	0.807	0.76
CHD2	PDDC1	0.00152088	-0.148925	0.12	0.223
CHD2	ZFAS1	0.00161692	-0.151716	0.88	0.929
CHD2	ATP13A2	0.00166187	0.124947	0.182	0.099
CHD2	SFXN3	0.00174104	-0.140712	0.083	0.178
CHD2	ZNF793	0.00174325	0.131334	0.161	0.084
CHD2	NEFM	0.00202481	-0.138167	1	1
CHD2	PRKDC	0.00225773	0.121604	0.724	0.603
CHD2	ANKRD46	0.00243082	0.149065	0.245	0.156
CHD2	C18orf8	0.00246539	0.285742	0.526	0.454
CHD2	UQCRQ	0.00253996	0.136338	0.979	0.962
CHD2	ATP5O	0.00267366	0.10076	0.99	0.969
CHD2	EP400	0.00268569	0.130634	0.286	0.183
CHD2	FAM212B	0.00292948	0.169339	0.396	0.3
CHD2	RALGAPA1	0.00300915	-0.128594	0.094	0.183
CHD2	RP11-531A24.3	0.00306011	0.103335	0.214	0.126
CHD2	C16orf45	0.00310408	-0.153211	0.328	0.44
CHD2	ADGRL3	0.00316591	0.143003	0.339	0.24
CHD2	HERC2	0.00339839	-0.171593	0.557	0.647
CHD2	RFXANK	0.00347663	-0.118761	0.203	0.315
CHD2	UPF3B	0.00368286	-0.142547	0.333	0.46
CHD2	STX2	0.0037526	0.131802	0.318	0.223
CHD2	PRDX1	0.00379225	0.115658	0.958	0.973
CHD2	SOX11	0.00385054	0.184432	0.922	0.929
CHD2	OGDH	0.00392842	0.127714	0.208	0.125
CHD2	MYO10	0.00399038	-0.130271	0.109	0.198
CHD2	CD163L1	0.0042323	0.176586	0.469	0.368
CHD2	ANAPC16	0.00424743	0.134255	0.714	0.632
CHD2	GTF2F2	0.0043679	-0.128353	0.286	0.407
CHD2	GDAP1L1	0.00439062	-0.171469	0.484	0.584
CHD2	COPS6	0.00446189	0.162484	0.641	0.573
CHD2	LGI4	0.00449415	-0.111372	0.234	0.359
CHD2	FBXL16	0.00452035	-0.133683	0.172	0.277
CHD2	PREX1	0.00468374	0.173107	0.359	0.273
CHD2	TXNDC17	0.00470725	0.116241	0.828	0.753
CHD2	MLLT11	0.00474375	-0.146836	0.953	0.965
CHD2	ORMDL1	0.00491522	-0.148698	0.344	0.447
CHD2	BEX2	0.00495949	-0.145021	0.854	0.912
CHD2	EEF1B2	0.00503958	-0.120539	0.891	0.914
CHD2	GPX4	0.00507462	0.107322	0.969	0.936
CHD2	RRAGA	0.00512759	-0.131414	0.266	0.374
CHD2	G6PD	0.00519491	0.137914	0.5	0.401
CHD2	SSBP4	0.00561715	-0.116335	0.073	0.152
CHD2	RNMT	0.0058575	-0.125835	0.609	0.714
CHD2	COX17	0.00588563	0.16474	0.823	0.76
CHD2	TMEM99	0.00596429	0.129034	0.182	0.11
CHD2	CD276	0.00605323	0.135845	0.276	0.192
CHD2	FXYD7	0.00606266	-0.168707	0.63	0.738
CHD2	CTD-3064C13.1	0.00620455	0.187281	0.38	0.286
CHD2	PCP4	0.00629916	-0.450085	0.062	0.134
CHD2	MAB21L1	0.00646089	-0.178221	0.495	0.593
CHD2	EIF3L	0.00647832	-0.133736	0.62	0.701
CHD2	CCPG1	0.00658195	-0.119829	0.208	0.311
CHD2	SMS	0.00661683	-0.134128	0.516	0.621
CHD2	SAP18	0.00668001	-0.103821	0.88	0.886
CHD2	AIMP1	0.00697308	-0.148132	0.141	0.229
CHD2	STYXL1	0.00701167	0.136476	0.307	0.212
CHD2	RBM15B	0.00729745	0.116173	0.229	0.147
CHD2	EIF3K	0.00732393	-0.11717	0.792	0.863
CHD2	NEUROG1	0.00756299	0.136819	0.203	0.126
CHD2	GLCCI1	0.00762284	-0.130769	0.156	0.251
CHD2	SMIM12	0.00782299	0.132107	0.443	0.35
CHD2	ADCY1	0.00795004	-0.100484	0.099	0.179
CHD2	MRPL15	0.00795155	0.149113	0.469	0.364
CHD2	RASGEF1B	0.00812187	0.197693	0.115	0.059
CHD2	ACO2	0.00814877	0.124578	0.391	0.289
CHD2	TRA2A	0.00821366	-0.113808	0.302	0.405
CHD2	C1orf123	0.00840362	-0.130204	0.234	0.332
CHD2	CHD8	0.00852847	-0.120151	0.24	0.346
CHD2	AC090498.1	0.008636	0.152505	0.38	0.291
CHD2	POLR2J3	0.00880083	-0.112404	0.573	0.69
CHD2	ZSCAN16-AS1	0.00952556	-0.149465	0.422	0.529
CHD2	DGCR6L	0.009626	-0.119902	0.24	0.348
CHD2	CDV3	0.00968837	0.119439	0.229	0.152
CHD2	PMEL	0.00975642	-0.14452	0.302	0.414
CHD2	ZEB2	0.00999444	-0.101724	0.458	0.57
CHD2	ACTR2	0.0102735	0.13216	0.49	0.388
CHD2	SERINC1	0.0104473	-0.119833	0.453	0.568
CHD2	BRD4	0.0104968	0.125818	0.516	0.438
CHD2	AFAP1	0.0105639	0.155269	0.479	0.392
CHD2	NDUFA5	0.0107066	0.139286	0.646	0.575
CHD2	CLIP2	0.0107256	0.133355	0.224	0.148
CHD2	DEF8	0.0107832	0.135853	0.615	0.548
CHD2	MAB21L2	0.0115639	0.118942	0.354	0.253
CHD2	KPNA6	0.0116546	0.117647	0.406	0.306
CHD2	ASIC4	0.0116807	-0.141743	0.375	0.469
CHD2	CCDC174	0.0119559	-0.122155	0.193	0.286
CHD2	PPP2R5C	0.0121499	0.122876	0.307	0.229
CHD2	C12orf45	0.0121846	-0.136415	0.198	0.291
CHD2	SH3PXD2A	0.0122932	-0.148653	0.182	0.273
CHD2	MARCKSL1	0.0123346	-0.183844	0.906	0.912
CHD2	DOC2B	0.0127807	0.116051	0.526	0.43
CHD2	ASIC1	0.012807	0.159182	0.24	0.161
CHD2	MRPL52	0.0128803	0.114888	0.729	0.658
CHD2	DACH1	0.0129515	-0.130366	0.495	0.581
CHD2	MPRIP	0.0130116	-0.128806	0.214	0.31
CHD2	NUBP2	0.0134509	-0.122714	0.307	0.418
CHD2	CEPT1	0.0136758	0.101871	0.146	0.086
CHD2	CMIP	0.0137935	-0.131121	0.276	0.377
CHD2	LYPLA2	0.014047	-0.128819	0.312	0.41
CHD2	PSME4	0.0141137	-0.122803	0.182	0.271
CHD2	BEX1	0.0144451	0.162076	0.516	0.405
CHD2	MTSS1	0.0145277	-0.158052	0.188	0.267
CHD2	NUDT5	0.0148067	-0.133907	0.255	0.344
CHD2	ROMO1	0.015152	0.135564	0.823	0.802
CHD2	AKR7A2	0.0151639	-0.110558	0.224	0.315
CHD2	APBA2	0.0151796	0.130885	0.401	0.313
CHD2	CALM2	0.0155012	-0.119743	0.995	0.998
CHD2	NSG1	0.0155282	-0.112188	0.859	0.886
CHD2	ACAP3	0.0158502	0.149864	0.453	0.377
CHD2	CEP295	0.0159927	-0.110205	0.115	0.189
CHD2	H1FX	0.0161738	0.126555	0.38	0.297
CHD2	KIAA1456	0.016216	-0.127413	0.333	0.425
CHD2	LINC00094	0.0162695	0.106486	0.193	0.126
CHD2	MORF4L1	0.0162904	-0.130079	0.792	0.832
CHD2	RGS16	0.0163107	0.199904	0.26	0.185
CHD2	ERGIC1	0.0163462	-0.104695	0.188	0.277
CHD2	FER	0.0163577	-0.107315	0.12	0.194
CHD2	SLC17A6	0.0164059	-0.1273	0.312	0.397
CHD2	SMG1	0.0164701	-0.115124	0.12	0.192
CHD2	SRSF8	0.0165616	0.143762	0.448	0.363
CHD2	CUTA	0.0165809	-0.104478	0.964	0.98
CHD2	IRF2BP2	0.0166438	0.135081	0.38	0.293
CHD2	POLD2	0.0167186	0.14199	0.484	0.412
CHD2	GNG8	0.0167931	0.165967	0.703	0.621
CHD2	SLC25A13	0.0168496	0.118889	0.328	0.247
CHD2	HMP19	0.0178929	-0.109911	0.146	0.225
CHD2	FKBP8	0.0181534	0.133977	0.604	0.533
CHD2	IFT27	0.0186665	-0.106841	0.281	0.383
CHD2	ACAA2	0.0187987	0.13015	0.276	0.205
CHD2	NEDD1	0.018889	-0.112799	0.083	0.148
CHD2	SYNC	0.0189709	0.136922	0.292	0.214
CHD2	LONP2	0.0190289	-0.115021	0.167	0.247
CHD2	IFT57	0.0190622	0.11761	0.312	0.229
CHD2	MRPL45	0.0190732	-0.107736	0.156	0.234
CHD2	YARS	0.019109	0.103389	0.328	0.244
CHD2	ECHS1	0.0196144	-0.102255	0.552	0.637
CHD2	ELOF1	0.0201449	-0.126969	0.448	0.549
CHD2	RHBDD2	0.0203098	-0.130501	0.281	0.361
CHD2	SPSB3	0.0203428	0.113608	0.401	0.313
CHD2	PSMB6	0.0205683	0.125895	0.854	0.826
CHD2	PPM1G	0.0206464	0.104804	0.557	0.471
CHD2	HELZ	0.0206981	0.121655	0.266	0.19
CHD2	CBR1	0.0209002	0.116797	0.312	0.231
CHD2	HNRNPH1	0.0210597	0.137256	0.604	0.511
CHD2	EPB41L3	0.0212254	-0.137519	0.552	0.614
CHD2	MUM1	0.0216546	0.114261	0.609	0.52
CHD2	CLSTN1	0.0217093	0.107146	0.344	0.262
CHD2	CHCHD1	0.0218095	0.121247	0.745	0.683
CHD2	MEX3A	0.0218347	-0.123365	0.729	0.791
CHD2	EEF1A1	0.0220222	-0.123829	1	0.998
CHD2	GFRA1	0.0221006	-0.120657	0.479	0.581
CHD2	EFNA5	0.022205	0.100738	0.38	0.299
CHD2	PTPRG	0.0222534	-0.139968	0.401	0.463
CHD2	BRMS1	0.0224311	0.104402	0.354	0.267
CHD2	SPECC1L	0.0225084	0.102993	0.219	0.15
CHD2	CELF5	0.0228577	0.1083	0.135	0.081
CHD2	ZNF721	0.023313	0.10011	0.193	0.126
CHD2	ADPRHL1	0.0235452	-0.118553	0.177	0.255
CHD2	EIF4EBP2	0.0240483	-0.109896	0.365	0.469
CHD2	ITGB1BP1	0.0241022	0.124463	0.464	0.397
CHD2	IMPAD1	0.025156	0.104825	0.193	0.128
CHD2	SYF2	0.0253425	-0.118342	0.516	0.595
CHD2	C6orf48	0.0254015	-0.111264	0.729	0.791
CHD2	MEF2A	0.0254944	0.102082	0.281	0.209
CHD2	RBM17	0.0257751	-0.125794	0.396	0.507
CHD2	PPP1R1C	0.0258727	-0.130809	0.188	0.262
CHD2	TNC	0.0263008	-0.111183	0.349	0.447
CHD2	FAM65A	0.0264803	0.118059	0.271	0.196
CHD2	RICTOR	0.0271812	0.131972	0.271	0.205
CHD2	RBP1	0.0273692	0.12255	0.193	0.132
CHD2	ZHX1	0.0275424	-0.120763	0.37	0.467
CHD2	XRN2	0.0283047	0.123886	0.677	0.597
CHD2	APC	0.0285645	-0.117427	0.578	0.65
CHD2	JPH4	0.0285688	-0.111419	0.125	0.194
CHD2	MIDN	0.0294013	-0.103954	0.589	0.659
CHD2	PDE6D	0.0295745	0.106356	0.385	0.311
CHD2	LIMA1	0.0301816	-0.110542	0.245	0.326
CHD2	MACF1	0.0302227	-0.117183	0.495	0.566
CHD2	PTPN11	0.0305764	0.105429	0.312	0.234
CHD2	SRSF10	0.0308188	-0.144792	0.484	0.537
CHD2	PNPLA8	0.0308881	-0.143948	0.255	0.333
CHD2	RP9	0.0312593	-0.105982	0.302	0.39
CHD2	PPP1R14A	0.0312699	0.115743	0.682	0.599
CHD2	SIX3	0.0314395	-0.122873	0.188	0.258
CHD2	ARL6IP4	0.0314745	0.123432	0.849	0.791
CHD2	ANXA6	0.0316446	-0.107861	0.12	0.181
CHD2	CTBP2	0.0317154	-0.117966	0.521	0.599
CHD2	NRAS	0.0321484	0.107517	0.266	0.192
CHD2	ITGB1	0.0321526	-0.127014	0.365	0.447
CHD2	SELK	0.0324794	-0.107131	0.729	0.78
CHD2	CD320	0.0326985	-0.114209	0.24	0.317
CHD2	SPATS2L	0.0337034	0.114014	0.516	0.434
CHD2	EMC8	0.034194	-0.109197	0.146	0.212
CHD2	GAL	0.0351373	0.228531	0.198	0.139
CHD2	CYTH2	0.035445	-0.105285	0.401	0.491
CHD2	EEA1	0.0359099	0.130824	0.323	0.258
CHD2	TRPC4AP	0.0359571	0.102018	0.182	0.126
CHD2	MARCKS	0.0361735	0.154734	0.911	0.919
CHD2	CADM1	0.0372619	-0.112461	0.677	0.758
CHD2	GNG5	0.0381077	0.123833	0.823	0.777
CHD2	ZMYND8	0.038538	0.111109	0.432	0.364
CHD2	MGRN1	0.0387527	0.13415	0.406	0.33
CHD2	KLHL23	0.0387652	0.123717	0.677	0.63
CHD2	TBRG1	0.0387709	-0.126947	0.271	0.348
CHD2	LINC01033	0.0393048	0.135796	0.182	0.126
CHD2	USP10	0.039518	0.100991	0.297	0.231
CHD2	ACVR2B	0.0408206	-0.11527	0.318	0.401
CHD2	SLU7	0.0411917	-0.105675	0.297	0.385
CHD2	XKR7	0.0421363	0.112419	0.307	0.238
CHD2	AGTPBP1	0.0427588	0.128097	0.339	0.278
CHD2	MIEF1	0.0430308	0.114812	0.219	0.161
CHD2	PSMA3-AS1	0.0435957	-0.103129	0.333	0.432
CHD2	HMGB3	0.044189	0.119563	0.474	0.405
CHD2	LRRC58	0.044336	0.105368	0.172	0.121
CHD2	GGCT	0.0453616	0.128632	0.297	0.233
CHD2	TIMP2	0.0456553	0.115475	0.583	0.531
CHD2	RTN1	0.0457623	-0.138365	0.969	0.976
CHD2	CHERP	0.0460255	0.110521	0.177	0.125
CHD2	DCAF7	0.0461094	0.138638	0.547	0.52
CHD2	NHLH1	0.0465045	0.149842	0.833	0.784
CHD2	TMEM97	0.0465393	-0.108987	0.422	0.491
CHD2	NOVA1	0.0468133	-0.10782	0.703	0.777
CHD2	NCKAP1	0.0473571	-0.120544	0.177	0.238
CHD2	HES6	0.0480391	0.103459	0.208	0.152
CHD2	GNL3	0.0480731	0.100104	0.484	0.418
CHD2	COA5	0.0484924	0.103093	0.297	0.234
CHD2	CREBRF	0.0490465	0.104781	0.198	0.143
CHD2	UBL3	0.0496456	0.111336	0.208	0.15
CHD2	RP3-403A15.5	0.0502038	0.10177	0.188	0.136
CHD2	BACH1	0.05033	0.121235	0.234	0.176
CHD2	PJA2	0.0508528	-0.125502	0.448	0.529
CHD2	ESD	0.0509834	0.132115	0.719	0.687
CHD2	NHLH2	0.051123	0.121563	0.745	0.69
CHD2	PRDM8	0.0514622	0.113925	0.188	0.137
CHD2	MRPS12	0.0527424	0.113422	0.495	0.425
CHD2	NRG1	0.0530415	-0.120953	0.266	0.332
CHD2	SIX1	0.0536731	-0.115629	0.823	0.875
CHD2	PCF11	0.0537818	0.107823	0.24	0.183
CHD2	CCDC34	0.0540351	-0.111007	0.224	0.295
CHD2	RP11-382A20.3	0.0540713	-0.101128	0.427	0.515
CHD2	PIK3R3	0.0544734	-0.111227	0.312	0.386
CHD2	ZNF790	0.0548893	0.104473	0.224	0.168
CHD2	C11orf1	0.055401	-0.100413	0.25	0.319
CHD2	KHDRBS1	0.0559582	-0.100386	0.604	0.626
CHD2	EXOSC3	0.0564889	-0.109509	0.203	0.266
CHD2	CERS6	0.0564917	0.121951	0.573	0.495
CHD2	GDAP1	0.0570655	0.132949	0.385	0.33
CHD2	C3orf70	0.0583337	0.121218	0.224	0.165
CHD2	SLC5A3	0.0583547	0.11998	0.427	0.353
CHD2	CISD1	0.0592405	0.11071	0.698	0.67
CHD2	GRINA	0.0593359	-0.104436	0.542	0.592
CHD2	RSBN1L	0.0603685	0.125027	0.724	0.681
CHD2	COX5A	0.0604172	0.101262	0.964	0.93
CHD2	SSTR2	0.0610528	0.1296	0.224	0.167
CHD2	TMEM132A	0.0611242	-0.104184	0.417	0.487
CHD2	SRCIN1	0.0612238	0.10781	0.297	0.236
CHD2	COTL1	0.0615521	0.11442	0.266	0.209
CHD2	MIR4458HG	0.0616466	0.122317	0.307	0.247
CHD2	EFR3B	0.0619955	0.114079	0.245	0.192
CHD2	TNPO2	0.0622485	0.12087	0.323	0.264
CHD2	NOL3	0.0623556	0.105347	0.344	0.277
CHD2	TP53I11	0.0625111	0.126161	0.625	0.582
CHD2	MRPL2	0.0625684	0.115086	0.391	0.339
CHD2	VHL	0.0638536	0.10348	0.224	0.168
CHD2	PHF20	0.0652628	0.110041	0.526	0.463
CHD2	EIF2AK2	0.0656054	-0.109734	0.182	0.242
CHD2	ARL6IP1	0.0663287	0.125985	0.604	0.566
CHD2	KPNA5	0.0673389	-0.10935	0.198	0.256
CHD2	PSMD11	0.0675857	0.10321	0.333	0.278
CHD2	CAMKK2	0.0676663	0.134875	0.229	0.179
CHD2	CAPRIN1	0.0683255	0.108361	0.552	0.498
CHD2	ZNF689	0.0687568	0.125817	0.193	0.145
CHD2	ZNF22	0.0703043	-0.119102	0.474	0.52
CHD2	FDX1	0.0711486	-0.105701	0.172	0.227
CHD2	CALCOCO2	0.0722501	0.112784	0.198	0.152
CHD2	ADIPOR2	0.0728978	0.100301	0.234	0.178
CHD2	LEPROT	0.0742886	0.102166	0.307	0.253
CHD2	MAGOH	0.0755001	0.105702	0.37	0.302
CHD2	WDR54	0.0756386	-0.125389	0.396	0.465
CHD2	VPS72	0.0766334	-0.113348	0.448	0.493
CHD2	SATB1	0.0775096	0.10231	0.568	0.538
CHD2	EID2	0.0778548	0.10049	0.172	0.126
CHD2	JAGN1	0.0781309	-0.116698	0.328	0.385
CHD2	KXD1	0.0784795	0.151015	0.286	0.236
CHD2	SPG7	0.079085	-0.112593	0.276	0.335
CHD2	TANC2	0.0799802	0.110286	0.208	0.161
CHD2	TNPO1	0.0800839	-0.10216	0.427	0.518
CHD2	GIT1	0.0801046	0.105239	0.161	0.117
CHD2	SMIM20	0.0811371	0.121334	0.323	0.271
CHD2	CMSS1	0.0813633	0.111982	0.615	0.562
CHD2	SELM	0.0817138	0.118108	0.635	0.593
CHD2	RBMX2	0.0825452	0.103461	0.349	0.288
CHD2	CDC42BPB	0.0832293	0.124968	0.333	0.284
CHD2	NUB1	0.0835689	-0.124708	0.24	0.291
CHD2	PWP1	0.0836873	-0.124647	0.349	0.416
CHD2	PSMB2	0.0841746	0.102962	0.693	0.626
CHD2	ZIC4	0.084764	0.124715	0.557	0.531
CHD2	UBE2Q2	0.0850675	0.108469	0.177	0.132
CHD2	RP11-620J15.3	0.0856852	0.103933	0.49	0.419
CHD2	ORMDL3	0.0869177	0.102848	0.297	0.236
CHD2	NTMT1	0.087289	0.10466	0.625	0.592
CHD2	SARS	0.0912716	0.103534	0.797	0.738
CHD2	BAD	0.092976	0.129347	0.708	0.658
CHD2	NEUROD1	0.0972833	0.13466	0.953	0.925
CHD2	NUDCD3	0.0976215	-0.108515	0.24	0.293
CHD2	ITGAE	0.0980389	-0.106881	0.557	0.641
CHD2	TYW3	0.0984372	0.114707	0.167	0.126
CHD2	DPP7	0.0987382	-0.102426	0.141	0.187
CHD2	GADD45GIP1	0.0988428	0.115346	0.828	0.811
CHD2	AQR	0.0996401	0.120778	0.25	0.203
CHD2	SEMA6D	0.101598	0.125932	0.37	0.321
CHD2	TRMT112	0.103872	0.104166	0.714	0.7
CHD2	CNN3	0.107641	0.110779	0.562	0.522
CHD2	POLR2A	0.111818	0.127496	0.495	0.434
CHD2	WSB2	0.112827	0.100312	0.182	0.139
CHD2	SAT1	0.113138	0.102613	0.536	0.504
CHD2	WDR82	0.115138	-0.108123	0.38	0.432
CHD2	ALCAM	0.116496	-0.108373	0.255	0.319
CHD2	MAP4K5	0.117511	0.118602	0.271	0.222
CHD2	CTNNB1	0.119921	0.333025	0.62	0.588
CHD2	LAPTM4B	0.120165	0.113833	0.516	0.467
CHD2	CLPX	0.120888	0.116217	0.198	0.156
CHD2	IGDCC3	0.121996	0.112063	0.641	0.619
CHD2	GLIPR2	0.124301	0.129428	0.344	0.297
CHD2	MT1F	0.128882	0.10743	0.24	0.192
CHD2	CNIH2	0.129719	0.105258	0.26	0.218
CHD2	KIF1B	0.132877	0.109083	0.531	0.482
CHD2	SCD	0.133041	0.110193	0.698	0.632
CHD2	FADS2	0.133377	0.114987	0.573	0.533
CHD2	NAP1L4	0.137224	0.115369	0.604	0.592
CHD2	RALA	0.141508	0.103022	0.5	0.449
CHD2	FBXW11	0.142228	-0.101855	0.438	0.489
CHD2	MYH10	0.144055	0.164823	0.432	0.403
CHD2	MRPL57	0.145467	0.103733	0.609	0.582
CHD2	CTNND1	0.145857	0.116786	0.276	0.234
CHD2	CCER2	0.148486	0.102984	0.635	0.614
CHD2	PHLDA1	0.153368	-0.132507	0.422	0.456
CHD2	ERP29	0.156487	0.101755	0.724	0.744
CHD2	MAPK8IP2	0.160383	-0.100047	0.208	0.253
CHD2	ARPC5L	0.160429	0.110576	0.411	0.372
CHD2	DHCR24	0.164451	-0.109731	0.406	0.451
CHD2	EXOSC4	0.164661	-0.106561	0.359	0.394
CHD2	KDM6B	0.164963	0.125317	0.438	0.41
CHD2	SERPINF1	0.165801	0.120775	0.391	0.353
CHD2	IMPDH2	0.168497	0.10084	0.286	0.251
CHD2	FKBP4	0.170628	0.124468	0.349	0.308
CHD2	PKM	0.171358	0.105574	0.615	0.599
CHD2	BAZ2A	0.172717	0.117329	0.443	0.408
CHD2	BRD8	0.175334	0.11659	0.38	0.353
CHD2	SET	0.182217	0.127423	0.823	0.815
CHD2	AUTS2	0.184377	0.10038	0.604	0.581
CHD2	ZNF3	0.211377	0.11292	0.229	0.198
CHD2	DNMT3A	0.216231	0.112486	0.375	0.335
CHD2	PTBP2	0.219866	0.113813	0.255	0.223
CHD2	MED11	0.222983	0.109292	0.203	0.176
CHD2	KAT6A	0.225348	0.110707	0.312	0.278
CHD2	STAMBP	0.228246	0.109437	0.417	0.379
CHD2	PTGDS	0.231586	0.176341	0.38	0.346
CHD2	ITM2C	0.246009	0.134894	0.688	0.67
CHD2	ATP6V1G2	0.252108	0.104488	0.495	0.487
CHD2	SPON2	0.253456	0.103726	0.349	0.31
CHD2	MFNG	0.255116	0.101996	0.271	0.24
CHD2	CSNK1E	0.255881	0.100508	0.635	0.606
CHD2	MORN4	0.256678	0.117895	0.198	0.17
CHD2	EIF5A	0.257356	0.112931	0.766	0.764
CHD2	ODC1	0.270831	0.11698	0.297	0.266
CHD2	PDLIM4	0.295561	0.103802	0.568	0.546
CHD2	C8orf33	0.320053	0.111316	0.375	0.355
CHD2	GSTO1	0.348178	0.105078	0.307	0.293
CHD2	DZIP3	0.350263	0.101019	0.391	0.357
CHD2	HPCA	0.351824	0.10779	0.396	0.379
CHD2	CLTC	0.40573	0.103308	0.438	0.432
CHD2	NR3C1	0.466236	0.106103	0.115	0.099
CHD2	PHGDH	0.505598	0.109505	0.323	0.304
CHD2	SST	0.547707	0.101964	0.104	0.09
CHD2	PTPRS	0.665088	0.126883	0.547	0.56
CHD2	BCYRN1	0.810471	0.19739	0.125	0.139
CHD2	MEG3	0.950627	0.135954	0.505	0.54
CHD2	SVIP	0.966302	0.122323	0.771	0.83
Knockdown	Gene	p_val	avg_logFC	pct.1	pct.2
CHD8	CHD8-G2-gene	5.17597e-18	0.189731	0.127	0
CHD8	DAPK1	1.10365e-05	0.10568	0.161	0.079
CHD8	NDUFA5	4.44109e-05	0.151712	0.675	0.575
CHD8	CCT7	0.000118358	0.134374	0.58	0.478
CHD8	ARPC5	0.000186027	0.131901	0.693	0.61
CHD8	FKBP8	0.000282283	0.126552	0.619	0.533
CHD8	ITGB1BP1	0.000296526	0.146737	0.476	0.397
CHD8	SUMO1	0.000325253	0.142647	0.737	0.689
CHD8	SHMT2	0.000423971	0.120461	0.307	0.227
CHD8	COX11	0.00046497	0.122536	0.343	0.255
CHD8	YIPF1	0.000670219	0.104426	0.197	0.128
CHD8	NDUFA3	0.000718217	-0.115207	0.909	0.94
CHD8	CHD2	0.000783509	-0.11773	0.283	0.368
CHD8	YBX1	0.000868615	0.117699	0.939	0.918
CHD8	SNX6	0.000941736	0.104974	0.616	0.537
CHD8	SNX3	0.000998913	0.121678	0.53	0.441
CHD8	AP2A2	0.00114829	-0.115915	0.406	0.484
CHD8	PTH2	0.00127553	0.164809	0.698	0.623
CHD8	SRP9	0.00150303	0.131317	0.706	0.628
CHD8	SNRPE	0.00152707	-0.110722	0.913	0.914
CHD8	SNRPD3	0.00156681	0.110317	0.555	0.467
CHD8	INAFM1	0.00161283	0.130555	0.522	0.449
CHD8	HEXA	0.00162679	0.118011	0.22	0.158
CHD8	ATAT1	0.00164209	0.129333	0.443	0.364
CHD8	HMGN2	0.00245505	-0.111449	0.706	0.707
CHD8	DPF3	0.00256328	-0.104006	0.188	0.26
CHD8	SCOC	0.00270144	0.119935	0.479	0.408
CHD8	TMEM57	0.00294609	0.10487	0.386	0.313
CHD8	CDKN1C	0.0032925	-0.102818	0.378	0.46
CHD8	BNIP3	0.00338814	0.115377	0.447	0.374
CHD8	TNPO2	0.00387283	0.113487	0.335	0.264
CHD8	WRB	0.00417465	0.13046	0.485	0.425
CHD8	NAP1L4	0.0042799	0.103142	0.65	0.592
CHD8	PPP1R7	0.00433859	0.10172	0.46	0.383
CHD8	PSMC1	0.00440816	0.116477	0.602	0.551
CHD8	AP1S2	0.00458812	0.118381	0.454	0.386
CHD8	PFN2	0.00473987	0.121306	0.518	0.443
CHD8	SLC5A3	0.00485006	0.115613	0.439	0.353
CHD8	OLA1	0.00574337	0.107158	0.546	0.487
CHD8	FEZ1	0.0057675	0.105012	0.503	0.432
CHD8	MLLT11	0.00579402	0.121728	0.976	0.965
CHD8	PTPN11	0.00600628	0.100007	0.301	0.234
CHD8	MLLT4	0.00610064	0.10266	0.392	0.319
CHD8	FKBP1A	0.00666239	0.115357	0.677	0.617
CHD8	PRDX6	0.00675932	0.117831	0.445	0.388
CHD8	ETFB	0.00838247	0.117442	0.687	0.634
CHD8	MARCKSL1	0.00849858	0.12441	0.934	0.912
CHD8	GLTSCR2	0.00924081	0.107605	0.608	0.542
CHD8	SRSF5	0.0102883	0.101406	0.744	0.727
CHD8	PGAM1	0.0111002	0.10846	0.658	0.619
CHD8	ARL6IP1	0.0112227	0.108215	0.615	0.566
CHD8	ENO1	0.0128444	0.111458	0.687	0.63
CHD8	SELT	0.0137529	0.110553	0.32	0.266
CHD8	CXXC5	0.0174344	0.113103	0.755	0.705
CHD8	PYURF	0.0178991	0.101922	0.494	0.46
CHD8	ELAVL4	0.0255591	0.117103	0.141	0.101
CHD8	RGS16	0.0394188	-0.138106	0.145	0.185
CHD8	IGFBP5	0.133633	0.25117	0.201	0.172
CHD8	CTNNB1	0.218982	0.139271	0.614	0.588
Knockdown	Gene	p_val	avg_logFC	pct.1	pct.2
CTNND2	CTNND2-G2-gene	4.99737e-18	0.220932	0.131	0
CTNND2	B4GALT5	5.18176e-05	-0.160316	0.131	0.256
CTNND2	AL592183.1	0.000144171	0.115616	0.153	0.07
CTNND2	GRIPAP1	0.000160351	-0.152469	0.208	0.332
CTNND2	C16orf45	0.000168769	-0.170768	0.314	0.44
CTNND2	RAP1GDS1	0.000267494	-0.156802	0.153	0.271
CTNND2	ZFAND5	0.000474744	0.187776	0.471	0.374
CTNND2	SEC14L1	0.000610824	-0.146949	0.321	0.456
CTNND2	PLTP	0.000697554	-0.144881	0.117	0.209
CTNND2	DAPK1	0.00108038	0.105378	0.15	0.079
CTNND2	GRM2	0.0012268	0.12284	0.197	0.117
CTNND2	LRIG2	0.00132557	-0.115109	0.091	0.174
CTNND2	GTF2I	0.00157157	0.123771	0.839	0.819
CTNND2	SH3PXD2A	0.00165906	-0.129253	0.168	0.273
CTNND2	EAPP	0.00187917	0.150749	0.547	0.462
CTNND2	GRINA	0.00192846	-0.152014	0.482	0.592
CTNND2	NSF	0.00196578	0.14475	0.215	0.134
CTNND2	MSRB1	0.0022678	-0.100886	0.161	0.256
CTNND2	TIMMDC1	0.00260091	-0.12608	0.274	0.381
CTNND2	SNN	0.00290176	-0.125055	0.431	0.535
CTNND2	PPM1K	0.00309419	0.143717	0.248	0.167
CTNND2	CHD9	0.00315956	0.109647	0.763	0.701
CTNND2	CDC42	0.0033923	0.160789	0.814	0.777
CTNND2	CD47	0.00393253	-0.13481	0.153	0.238
CTNND2	MGST3	0.00459551	0.12577	0.883	0.821
CTNND2	SRPK2	0.00494996	-0.136844	0.555	0.658
CTNND2	SOGA1	0.00652576	0.130499	0.285	0.207
CTNND2	CACUL1	0.00695786	-0.116592	0.27	0.357
CTNND2	TMOD2	0.00715936	-0.108628	0.219	0.308
CTNND2	GCC2	0.00723808	-0.104318	0.259	0.355
CTNND2	ZNF721	0.00748325	0.128727	0.193	0.126
CTNND2	MAP2K2	0.00754721	-0.109817	0.128	0.2
CTNND2	RNF219	0.00807564	0.134337	0.325	0.244
CTNND2	GSTO1	0.00833861	0.106756	0.369	0.293
CTNND2	ANAPC7	0.00855544	0.145665	0.201	0.137
CTNND2	ELAC2	0.00867617	0.104405	0.113	0.062
CTNND2	FMNL2	0.0087168	0.102026	0.255	0.181
CTNND2	CDC37L1	0.00895022	0.122175	0.212	0.145
CTNND2	CCDC77	0.00922699	-0.10116	0.08	0.141
CTNND2	RGS16	0.0100226	-0.201395	0.117	0.185
CTNND2	ZMAT5	0.0102027	0.133795	0.31	0.24
CTNND2	YWHAQ	0.0103218	-0.131956	0.686	0.769
CTNND2	XRN2	0.0110785	0.178993	0.639	0.597
CTNND2	C17orf89	0.0113912	-0.120127	0.303	0.374
CTNND2	TSPAN14	0.0113928	-0.113837	0.288	0.379
CTNND2	TCOF1	0.0113976	0.113525	0.237	0.167
CTNND2	HNRNPH3	0.0116061	-0.115326	0.482	0.562
CTNND2	EIF3K	0.0122984	-0.107084	0.777	0.863
CTNND2	SDHC	0.0125434	0.102938	0.639	0.559
CTNND2	CTNNBL1	0.0133019	-0.100144	0.182	0.258
CTNND2	ADGRL3	0.0133553	0.138485	0.307	0.24
CTNND2	ARPC3	0.013726	-0.113048	0.785	0.833
CTNND2	ORC4	0.0137875	-0.102138	0.292	0.379
CTNND2	PRR4	0.014249	0.124711	0.474	0.394
CTNND2	SNF8	0.0144694	-0.128082	0.653	0.714
CTNND2	NAPG	0.0145108	-0.112684	0.237	0.311
CTNND2	PDHA1	0.0149176	-0.117968	0.314	0.397
CTNND2	CEP89	0.0149286	0.115871	0.285	0.209
CTNND2	MORF4L2	0.0164286	0.113101	0.639	0.597
CTNND2	KIAA0355	0.0171135	0.113661	0.347	0.266
CTNND2	SNRPD3	0.0182624	0.151211	0.529	0.467
CTNND2	SUMF2	0.0182832	0.109123	0.266	0.203
CTNND2	CCT7	0.0184565	0.119709	0.569	0.478
CTNND2	DAZAP2	0.019127	0.153169	0.35	0.286
CTNND2	NSMF	0.0197164	-0.101017	0.215	0.293
CTNND2	GSK3B	0.0216626	-0.110977	0.445	0.54
CTNND2	VCAN	0.0225677	-0.104495	0.405	0.509
CTNND2	TET1	0.0226708	-0.111289	0.387	0.473
CTNND2	COX11	0.0227472	0.116188	0.321	0.255
CTNND2	TSPAN13	0.023221	-0.10579	0.175	0.244
CTNND2	UBE2L6	0.0238232	-0.100673	0.529	0.617
CTNND2	MAB21L2	0.0247525	0.158191	0.321	0.253
CTNND2	GLRX	0.0269078	-0.111871	0.723	0.81
CTNND2	UBE2L3	0.0272311	0.13599	0.646	0.593
CTNND2	ORMDL1	0.0281051	-0.115193	0.376	0.447
CTNND2	CTSB	0.0285226	-0.102285	0.179	0.244
CTNND2	CMIP	0.0300088	-0.105696	0.307	0.377
CTNND2	MRFAP1	0.0303051	0.118625	0.562	0.495
CTNND2	PIAS1	0.030462	0.130639	0.42	0.361
CTNND2	TRIM37	0.030931	0.109131	0.303	0.233
CTNND2	RNF10	0.0311975	0.123654	0.292	0.236
CTNND2	SPTY2D1	0.0350816	0.104213	0.142	0.095
CTNND2	GALNT16	0.0353282	0.133825	0.274	0.211
CTNND2	C14orf1	0.0359238	-0.101701	0.343	0.416
CTNND2	DSG2	0.0361111	0.113251	0.161	0.114
CTNND2	UBE2E3	0.0368649	-0.102136	0.777	0.832
CTNND2	SNRPE	0.0383925	-0.102571	0.865	0.914
CTNND2	PDDC1	0.0389409	-0.100305	0.168	0.223
CTNND2	VPS72	0.0392539	-0.110287	0.431	0.493
CTNND2	PLEKHA1	0.0394377	0.10077	0.241	0.189
CTNND2	SUPT4H1	0.041347	0.111028	0.693	0.665
CTNND2	THOC7	0.0420154	0.105119	0.693	0.656
CTNND2	AHDC1	0.0439969	-0.100493	0.383	0.452
CTNND2	ADGRL1	0.0448402	0.108229	0.372	0.313
CTNND2	H1FX	0.0452119	0.135478	0.343	0.297
CTNND2	FAM171A2	0.0456024	0.120655	0.128	0.088
CTNND2	SUPV3L1	0.0456651	0.105408	0.12	0.081
CTNND2	TMEM132A	0.0463807	0.113778	0.547	0.487
CTNND2	RNF157	0.0471963	-0.110116	0.215	0.267
CTNND2	BCKDK	0.0473296	0.111899	0.223	0.172
CTNND2	VAX2	0.0509954	-0.123044	0.296	0.355
CTNND2	IFT81	0.0513038	-0.101644	0.237	0.293
CTNND2	PHIP	0.0529871	0.105127	0.511	0.463
CTNND2	FLNB	0.0536128	0.117193	0.431	0.383
CTNND2	SKIV2L2	0.0563818	-0.101976	0.354	0.419
CTNND2	MZT2A	0.0571853	0.104616	0.792	0.762
CTNND2	NISCH	0.0579126	-0.105952	0.27	0.335
CTNND2	SUPT16H	0.062189	-0.100125	0.478	0.542
CTNND2	BTF3L4	0.0632679	0.104503	0.62	0.575
CTNND2	MOB4	0.065883	0.124208	0.354	0.31
CTNND2	TBPL1	0.0697282	0.10396	0.354	0.302
CTNND2	PLBD2	0.0742062	0.110635	0.226	0.185
CTNND2	MT-ND4L	0.0745455	0.129995	0.518	0.473
CTNND2	NDUFA5	0.0788843	0.106318	0.599	0.575
CTNND2	KAT6A	0.0805824	0.101064	0.321	0.278
CTNND2	ANK3	0.0817695	0.127297	0.708	0.683
CTNND2	PPP2CB	0.0836442	0.103488	0.416	0.361
CTNND2	RALY	0.0848119	-0.101204	0.639	0.7
CTNND2	AIDA	0.0873235	0.105284	0.307	0.26
CTNND2	PSME3	0.0889707	0.101646	0.314	0.262
CTNND2	ATP6V0E1	0.0893274	0.112494	0.533	0.493
CTNND2	UBE2S	0.0901698	-0.105309	0.493	0.544
CTNND2	MAB21L1	0.0946439	-0.107855	0.536	0.593
CTNND2	HIP1	0.0997769	0.101408	0.186	0.147
CTNND2	ENO1	0.106196	0.110284	0.672	0.63
CTNND2	MEF2C	0.112687	0.121269	0.624	0.581
CTNND2	HNRNPH1	0.114372	0.12304	0.547	0.511
CTNND2	SPARC	0.121453	0.117302	0.38	0.352
CTNND2	YY1	0.142748	-0.104912	0.394	0.443
CTNND2	MSI2	0.144176	-0.102521	0.562	0.625
CTNND2	PRDM8	0.146323	0.107436	0.172	0.137
CTNND2	KNOP1	0.15225	-0.107859	0.573	0.608
CTNND2	LANCL1	0.161672	0.103627	0.161	0.128
CTNND2	CEBPZ	0.173559	0.111467	0.445	0.418
CTNND2	MRPL34	0.18088	0.103879	0.591	0.559
CTNND2	IGSF3	0.192687	0.110039	0.252	0.223
CTNND2	IMPDH2	0.204658	0.110438	0.277	0.251
CTNND2	TMEM167A	0.206046	0.107932	0.496	0.465
CTNND2	SYMPK	0.219664	-0.100351	0.398	0.419
CTNND2	SHMT2	0.26753	0.101494	0.245	0.227
CTNND2	SOBP	0.281884	0.103605	0.281	0.262
CTNND2	PTPRS	0.289181	0.10956	0.58	0.56
CTNND2	PCP4	0.43602	0.177699	0.153	0.134
CTNND2	IGFBP5	0.645988	0.232095	0.182	0.172
Knockdown	Gene	p_val	avg_logFC	pct.1	pct.2
PTEN	RGS10	1.85072e-13	-0.230166	0.93	0.982
PTEN	NEFM	2.65892e-13	0.291411	1	1
PTEN	WLS	1.20318e-11	0.287644	0.267	0.104
PTEN	GNB2L1	5.74863e-10	-0.156443	0.998	0.993
PTEN	PPP1R1C	1.00262e-09	0.29518	0.431	0.262
PTEN	C21orf59	5.48978e-09	-0.27464	0.766	0.819
PTEN	PRPH	5.39625e-08	0.166193	0.236	0.104
PTEN	SNCA	6.62943e-08	0.249409	0.56	0.407
PTEN	MYL1	9.29816e-08	0.237772	0.195	0.081
PTEN	RAI14	1.89944e-07	0.244355	0.392	0.245
PTEN	NEUROD1	2.53062e-07	-0.143597	0.862	0.925
PTEN	NEFL	2.65014e-07	0.28371	0.982	0.978
PTEN	CRMP1	2.6916e-07	0.196253	0.849	0.707
PTEN	H3F3A	5.34294e-07	-0.109969	1	1
PTEN	TSC22D2	8.27244e-07	0.111406	0.208	0.095
PTEN	MAP7	8.64197e-07	0.150362	0.219	0.104
PTEN	CEP85L	1.00116e-06	0.162708	0.311	0.176
PTEN	ALCAM	2.05837e-06	0.338357	0.442	0.319
PTEN	TMEM167A	3.11409e-06	0.16757	0.617	0.465
PTEN	TCP10L	3.36345e-06	-0.177405	0.245	0.372
PTEN	PCP4	3.94835e-06	0.680631	0.243	0.134
PTEN	PTH2	6.94401e-06	0.367677	0.709	0.623
PTEN	SKIDA1	7.10486e-06	0.152038	0.26	0.145
PTEN	UQCRQ	8.70348e-06	0.147317	0.98	0.962
PTEN	DNER	8.88522e-06	0.21229	0.206	0.106
PTEN	UBA52	1.19295e-05	-0.107593	0.989	0.993
PTEN	PDE4DIP	1.45785e-05	0.11657	0.171	0.081
PTEN	DRAXIN	1.52534e-05	-0.174016	0.619	0.716
PTEN	MRFAP1	1.93985e-05	0.178567	0.608	0.495
PTEN	SCN9A	2.19681e-05	0.147877	0.206	0.112
PTEN	MAP1B	3.10547e-05	0.101887	1	0.998
PTEN	SLC25A6	3.94386e-05	-0.124653	0.963	0.967
PTEN	TSC22D1	4.03635e-05	0.190648	0.578	0.456
PTEN	MPC1	4.47506e-05	0.137471	0.42	0.293
PTEN	YWHAE	5.81319e-05	0.124171	0.967	0.94
PTEN	CDC42	7.54338e-05	0.140011	0.869	0.777
PTEN	PRDX1	7.87675e-05	-0.121441	0.958	0.973
PTEN	NRP2	8.40924e-05	0.200428	0.453	0.337
PTEN	GDE1	8.82979e-05	0.107198	0.249	0.148
PTEN	LRRC8B	8.86988e-05	0.112711	0.14	0.066
PTEN	MT-CO1	8.94273e-05	0.112737	0.998	0.998
PTEN	PICALM	0.0001	0.108927	0.254	0.154
PTEN	EIF4H	0.000107612	0.129603	0.492	0.366
PTEN	PPM1K	0.00011221	0.125672	0.271	0.167
PTEN	SRP72	0.000123507	0.128493	0.477	0.353
PTEN	BLCAP	0.000131521	0.103765	0.341	0.227
PTEN	CTD-3064C13.1	0.000140518	0.151206	0.4	0.286
PTEN	DDAH2	0.000152695	0.106067	0.943	0.899
PTEN	PPP1R17	0.000185484	-0.131714	0.691	0.751
PTEN	MFAP4	0.000190344	-0.153258	0.142	0.225
PTEN	UBXN1	0.000190466	-0.142792	0.742	0.821
PTEN	MMD	0.000223135	0.127773	0.379	0.267
PTEN	NF1	0.00022817	0.112551	0.289	0.192
PTEN	CHERP	0.000253055	0.101295	0.21	0.125
PTEN	CRABP2	0.000255622	0.25426	0.6	0.505
PTEN	GDAP1	0.000265943	0.154266	0.425	0.33
PTEN	UBE2M	0.000283447	0.126214	0.263	0.17
PTEN	CALM2	0.000283862	0.129667	0.998	0.998
PTEN	PPP1R1A	0.000286823	0.113735	0.179	0.101
PTEN	SNTG1	0.00029109	0.141077	0.414	0.3
PTEN	TRIM28	0.000296237	0.127368	0.42	0.306
PTEN	ATP2B4	0.00029852	0.124409	0.278	0.183
PTEN	SOBP	0.000335548	0.124596	0.372	0.262
PTEN	ADNP	0.000345609	0.105157	0.352	0.244
PTEN	G2E3	0.000394387	0.110553	0.319	0.212
PTEN	NGFR	0.000399943	0.136728	0.225	0.141
PTEN	DUSP8	0.000404917	0.128936	0.298	0.198
PTEN	GNG3	0.000415662	0.170515	0.954	0.943
PTEN	SYNC	0.000544552	0.104838	0.317	0.214
PTEN	VASH2	0.00055639	0.100245	0.284	0.19
PTEN	SCOC	0.000561674	0.122789	0.514	0.408
PTEN	PTGDS	0.000566273	-0.236987	0.267	0.346
PTEN	NCOA2	0.000609839	0.122621	0.28	0.187
PTEN	BCL7A	0.000623066	-0.148172	0.696	0.723
PTEN	COX6A1	0.000653093	0.109947	0.996	0.993
PTEN	FBXO2	0.000687763	0.104312	0.171	0.099
PTEN	PFN2	0.000688916	0.152552	0.551	0.443
PTEN	FKBP1B	0.000706703	0.153684	0.621	0.533
PTEN	SNRPE	0.000760946	-0.122487	0.902	0.914
PTEN	SLC17A6	0.000826342	0.156836	0.497	0.397
PTEN	NES	0.000885211	0.163237	0.571	0.474
PTEN	VCP	0.000904026	0.122439	0.488	0.37
PTEN	HSPA5	0.000913115	0.117072	0.429	0.328
PTEN	KCNQ2	0.000943384	0.111298	0.385	0.275
PTEN	TMEM97	0.00096359	-0.136537	0.425	0.491
PTEN	ID2	0.000993098	-0.102587	0.142	0.222
PTEN	CHMP3	0.00106583	0.100173	0.593	0.487
PTEN	EEF1B2	0.0010854	-0.116349	0.904	0.914
PTEN	PCMT1	0.00119302	0.135564	0.617	0.542
PTEN	VPS36	0.00121356	0.103425	0.416	0.313
PTEN	HRC	0.00127945	-0.137699	0.164	0.236
PTEN	PRPF8	0.00128809	0.1137	0.444	0.342
PTEN	MDGA1	0.00130309	0.136915	0.514	0.407
PTEN	YWHAG	0.00131287	0.141801	0.823	0.793
PTEN	CPE	0.00141737	0.102094	0.457	0.344
PTEN	SVIP	0.00148497	0.183113	0.869	0.83
PTEN	CLIC4	0.00153733	0.108019	0.177	0.11
PTEN	BAG6	0.0015685	0.123728	0.481	0.374
PTEN	TPM1	0.00168054	-0.125513	0.7	0.76
PTEN	RNF181	0.00172955	0.106863	0.7	0.593
PTEN	DAPK1	0.00174948	0.10561	0.138	0.079
PTEN	SELT	0.00193702	0.105119	0.352	0.266
PTEN	SPCS2	0.00198883	0.148824	0.733	0.634
PTEN	ARL6IP1	0.00206177	0.133022	0.641	0.566
PTEN	NSF	0.00210675	0.104081	0.206	0.134
PTEN	MTA2	0.0022026	0.102465	0.12	0.064
PTEN	STMN4	0.0022654	0.119677	0.91	0.899
PTEN	TIMM13	0.0022842	-0.112644	0.867	0.899
PTEN	PLEKHJ1	0.00264306	0.105532	0.731	0.634
PTEN	OTUB1	0.00279271	0.108299	0.54	0.456
PTEN	PNMA2	0.00294612	0.119108	0.26	0.187
PTEN	SAT1	0.00318433	0.160768	0.597	0.504
PTEN	DPYSL3	0.00323013	0.10863	0.49	0.397
PTEN	CACNB3	0.00329265	0.118549	0.449	0.366
PTEN	ACVR2B	0.00331145	-0.139458	0.337	0.401
PTEN	CD276	0.00339924	0.102373	0.271	0.192
PTEN	ZNF667-AS1	0.00350202	0.108939	0.849	0.791
PTEN	CDK12	0.0035352	0.113335	0.346	0.262
PTEN	AP1S2	0.00370606	0.116595	0.481	0.386
PTEN	DPYSL5	0.00380428	0.111731	0.466	0.379
PTEN	NDUFA5	0.0038728	0.113642	0.665	0.575
PTEN	TNPO2	0.00388342	0.117401	0.344	0.264
PTEN	TMEM9	0.00401505	0.10223	0.42	0.335
PTEN	SREBF2	0.0040499	0.103418	0.451	0.352
PTEN	EIF3K	0.00409617	-0.104314	0.847	0.863
PTEN	NRG1	0.00420022	0.102763	0.429	0.332
PTEN	MAZ	0.00455685	0.11464	0.466	0.37
PTEN	RAB7A	0.00479672	0.111339	0.562	0.484
PTEN	ONECUT2	0.00483774	0.112658	0.764	0.701
PTEN	KATNAL1	0.00495805	0.100674	0.252	0.179
PTEN	CRIP2	0.00501839	0.104784	0.917	0.839
PTEN	MAPT	0.00506581	0.107546	0.274	0.196
PTEN	NEUROD4	0.00516494	-0.122892	0.484	0.546
PTEN	GNG5	0.00566791	-0.105005	0.768	0.777
PTEN	KPNB1	0.00573928	0.113332	0.724	0.683
PTEN	TCF12	0.00601088	-0.105768	0.284	0.35
PTEN	IRF2BP2	0.00602924	0.107094	0.381	0.293
PTEN	ACOT7	0.00604322	0.105305	0.637	0.54
PTEN	PBX1	0.00605892	0.102798	0.667	0.582
PTEN	XRCC5	0.00653218	0.118498	0.781	0.716
PTEN	NOL7	0.00653871	0.118099	0.477	0.394
PTEN	IP6K2	0.00660635	0.10199	0.661	0.56
PTEN	GYPC	0.00670319	0.15138	0.387	0.302
PTEN	VCAN	0.00672821	-0.136236	0.442	0.509
PTEN	PTPN1	0.00683451	0.100773	0.49	0.403
PTEN	SUMO1	0.00684079	0.111827	0.757	0.689
PTEN	PPIB	0.00687781	-0.1198	0.652	0.716
PTEN	UBE2E3	0.00706663	-0.112287	0.818	0.832
PTEN	TXNIP	0.00739643	0.115838	0.486	0.407
PTEN	ATP6V0E2	0.00741961	0.107342	0.543	0.48
PTEN	MRPL22	0.00748374	0.120973	0.538	0.451
PTEN	SV2A	0.00761272	0.109674	0.418	0.33
PTEN	ARL6IP5	0.00778461	0.105879	0.709	0.632
PTEN	CCER2	0.00790789	-0.150102	0.571	0.614
PTEN	FKBP8	0.00827108	0.101131	0.613	0.533
PTEN	SKA2	0.00879074	0.105196	0.567	0.482
PTEN	ZFR2	0.00918967	0.121426	0.322	0.245
PTEN	MINOS1	0.00924214	0.113369	0.891	0.868
PTEN	SLC25A4	0.00956609	0.113194	0.595	0.526
PTEN	MRPL15	0.00980011	0.104715	0.446	0.364
PTEN	RNASEH2C	0.0101118	-0.123058	0.468	0.527
PTEN	SRP9	0.0104399	0.100399	0.709	0.628
PTEN	ETFB	0.0105138	0.112646	0.705	0.634
PTEN	SCD5	0.010653	0.106158	0.313	0.242
PTEN	SSR4	0.0110822	-0.109819	0.851	0.87
PTEN	LINC00599	0.0111968	-0.124333	0.562	0.606
PTEN	YBX1	0.0113856	0.104184	0.939	0.918
PTEN	C4orf48	0.0115695	0.146208	0.665	0.593
PTEN	AGAP3	0.0119392	-0.120453	0.35	0.403
PTEN	FEZ1	0.0126319	0.117242	0.512	0.432
PTEN	CDH2	0.0140841	0.113173	0.794	0.716
PTEN	MXRA8	0.0163865	-0.111897	0.197	0.253
PTEN	PSMC1	0.0168392	0.105589	0.613	0.551
PTEN	TET1	0.0174037	-0.121333	0.427	0.473
PTEN	POU6F2	0.0176478	-0.105274	0.389	0.445
PTEN	CARHSP1	0.0177483	-0.111263	0.707	0.729
PTEN	MAPRE3	0.0179939	0.110064	0.392	0.324
PTEN	MRPS36	0.0195325	-0.108936	0.711	0.722
PTEN	ZSCAN16-AS1	0.0198438	-0.103595	0.477	0.529
PTEN	ASNS	0.0227613	-0.114912	0.293	0.341
PTEN	EFR3B	0.0232076	0.11658	0.247	0.192
PTEN	CBLB	0.0237739	-0.117752	0.16	0.209
PTEN	ZMYND8	0.023969	-0.105026	0.311	0.364
PTEN	PGAM1	0.0244919	0.120067	0.672	0.619
PTEN	CCDC184	0.0247449	0.101027	0.357	0.293
PTEN	INA	0.0258595	0.114722	0.873	0.841
PTEN	CTHRC1	0.0289896	0.101812	0.547	0.471
PTEN	GPM6B	0.0301276	-0.105022	0.661	0.685
PTEN	CLIC1	0.0307734	0.112059	0.803	0.762
PTEN	SLC16A1	0.0338214	-0.112248	0.274	0.317
PTEN	RPRM	0.0368404	0.108543	0.464	0.405
PTEN	TNC	0.039894	0.145921	0.497	0.447
PTEN	KIF1B	0.0415772	0.108386	0.549	0.482
PTEN	MYDGF	0.0438267	0.12357	0.49	0.43
PTEN	C11orf1	0.0525727	-0.110187	0.287	0.319
PTEN	ATP1B1	0.062881	0.103692	0.635	0.581
PTEN	SRRM4	0.0639473	-0.128372	0.505	0.515
PTEN	MT1X	0.0673453	0.18985	0.136	0.097
PTEN	RGS16	0.0688525	-0.184971	0.149	0.185
PTEN	ZNF22	0.0738058	-0.104787	0.497	0.52
PTEN	TMEM50A	0.0769209	-0.103518	0.547	0.559
PTEN	CASP3	0.0809465	0.113983	0.711	0.689
PTEN	MSI2	0.0892097	-0.101934	0.604	0.625
PTEN	C18orf8	0.0984909	0.107934	0.492	0.454
PTEN	TRAPPC6A	0.105297	-0.100744	0.578	0.599
PTEN	PHF6	0.11513	-0.111282	0.328	0.353
PTEN	TLE4	0.272098	0.133349	0.58	0.551
Knockdown	Gene	p_val	avg_logFC	pct.1	pct.2
MECP2	MECP2	3.44323e-11	-0.28558	0.265	0.5
MECP2	OSBPL6	8.86284e-06	0.14639	0.205	0.097
MECP2	PPM1K	0.000206728	0.139889	0.275	0.167
MECP2	TMCC1	0.000433322	0.148155	0.225	0.137
MECP2	GFM1	0.000531165	0.107537	0.166	0.086
MECP2	LZIC	0.000672302	-0.13996	0.166	0.267
MECP2	ROMO1	0.000742062	0.12893	0.887	0.802
MECP2	PRPF8	0.00128556	0.113751	0.447	0.342
MECP2	USP14	0.00128885	0.139532	0.44	0.33
MECP2	C11orf58	0.00177772	0.134706	0.831	0.788
MECP2	DAXX	0.00204104	0.100597	0.166	0.095
MECP2	TMEM9	0.00205774	0.134975	0.43	0.335
MECP2	RAB4B	0.00220745	0.130165	0.232	0.154
MECP2	TULP4	0.00223028	0.104079	0.503	0.399
MECP2	SRL	0.00250348	0.100159	0.242	0.161
MECP2	CS	0.00255732	0.129448	0.424	0.328
MECP2	DCUN1D4	0.00270906	0.10226	0.209	0.132
MECP2	MED11	0.0032699	0.119815	0.255	0.176
MECP2	STX2	0.00350094	0.108664	0.308	0.223
MECP2	MAST1	0.00351366	0.10406	0.278	0.192
MECP2	DPYSL3	0.00357717	0.149395	0.51	0.397
MECP2	BAALC	0.00367093	-0.11039	0.248	0.346
MECP2	MTMR14	0.00369066	-0.109386	0.099	0.17
MECP2	CEP95	0.00374128	0.103015	0.189	0.117
MECP2	RAB6B	0.00383936	0.130034	0.52	0.441
MECP2	CACNB3	0.00449594	0.14799	0.444	0.366
MECP2	CD81	0.00463254	-0.108209	0.182	0.267
MECP2	ADI1	0.00491665	-0.110638	0.219	0.306
MECP2	OCA2	0.00546922	-0.103752	0.099	0.168
MECP2	SPATA33	0.00564389	-0.123857	0.162	0.238
MECP2	CAP2	0.00631728	0.11482	0.298	0.22
MECP2	EIF3K	0.00727081	-0.106611	0.851	0.863
MECP2	G2E3	0.00753421	0.107404	0.288	0.212
MECP2	SOX11	0.00870098	0.151993	0.957	0.929
MECP2	POGZ	0.00954855	0.11271	0.387	0.306
MECP2	TNPO2	0.00996696	0.120497	0.341	0.264
MECP2	RHOA	0.00997672	0.109106	0.692	0.628
MECP2	BNIP3	0.0100921	0.132618	0.457	0.374
MECP2	BAG6	0.0101427	0.129245	0.454	0.374
MECP2	KDELR2	0.0102565	-0.106493	0.156	0.223
MECP2	MORN4	0.0104252	0.101571	0.242	0.17
MECP2	ARPC4	0.0104754	0.107928	0.454	0.377
MECP2	RTFDC1	0.0110133	0.117929	0.487	0.418
MECP2	FAM200B	0.0110937	0.100873	0.652	0.575
MECP2	CHD9	0.0116453	0.112573	0.765	0.701
MECP2	KLHL42	0.0121604	0.12227	0.268	0.2
MECP2	PTRHD1	0.0122334	-0.124159	0.444	0.522
MECP2	ZNF638	0.012633	-0.128467	0.381	0.46
MECP2	WIPF2	0.0128265	0.123505	0.219	0.158
MECP2	RBM39	0.0134033	0.125214	0.881	0.872
MECP2	HIF1A	0.0134902	-0.100303	0.298	0.374
MECP2	CHTOP	0.0135703	0.109806	0.371	0.295
MECP2	SNX6	0.0138089	0.106013	0.603	0.537
MECP2	FAM92A1	0.0139627	0.107555	0.334	0.267
MECP2	NDUFAF2	0.014894	-0.145174	0.202	0.267
MECP2	EPB41L3	0.0149364	0.127605	0.662	0.614
MECP2	DDRGK1	0.0174531	-0.10723	0.331	0.412
MECP2	EXOSC3	0.0180719	-0.103009	0.195	0.266
MECP2	DECR1	0.0184114	0.101814	0.258	0.196
MECP2	DLG1	0.0192893	0.100104	0.205	0.147
MECP2	EPB41L4A-AS1	0.0194707	-0.10685	0.47	0.549
MECP2	EPN1	0.0195535	-0.102356	0.295	0.372
MECP2	NME4	0.0202677	-0.107509	0.619	0.674
MECP2	GDAP1	0.0213087	0.112992	0.394	0.33
MECP2	CFAP36	0.0223625	0.128218	0.427	0.359
MECP2	MAB21L1	0.02518	-0.129576	0.526	0.593
MECP2	C19orf25	0.0259261	-0.115298	0.315	0.396
MECP2	CNTFR	0.0259895	0.110661	0.202	0.145
MECP2	NES	0.0260277	0.132493	0.536	0.474
MECP2	CYB5R3	0.0273228	0.107577	0.536	0.467
MECP2	LRRC58	0.0289707	0.107235	0.169	0.121
MECP2	SEPT2	0.0302727	0.103156	0.56	0.485
MECP2	ZNF22	0.0309575	-0.107092	0.454	0.52
MECP2	CCDC184	0.0319501	0.122345	0.351	0.293
MECP2	HSPB1	0.0363177	0.115226	0.397	0.33
MECP2	COMMD2	0.0365055	0.104777	0.47	0.403
MECP2	CD47	0.0380036	-0.109302	0.182	0.238
MECP2	LYRM4	0.0400441	-0.102144	0.54	0.604
MECP2	PSMC4	0.0428495	0.132694	0.45	0.403
MECP2	MLXIP	0.0435867	0.108157	0.454	0.392
MECP2	MDFI	0.045735	-0.109965	0.162	0.211
MECP2	GRIPAP1	0.0457934	-0.106048	0.275	0.332
MECP2	RAPGEF6	0.0459202	0.106805	0.407	0.357
MECP2	GLUL	0.0499986	0.101491	0.334	0.282
MECP2	ACLY	0.0509309	0.112244	0.616	0.581
MECP2	TSPO	0.051282	0.106036	0.195	0.147
MECP2	ESF1	0.0520362	0.111017	0.553	0.518
MECP2	ZFR	0.0524708	0.128404	0.619	0.592
MECP2	UROD	0.0566651	-0.120054	0.295	0.346
MECP2	SMAD5	0.0663426	0.110697	0.391	0.337
MECP2	MMP24-AS1	0.0663903	-0.117606	0.377	0.414
MECP2	BACH2	0.0672149	0.108103	0.209	0.163
MECP2	TOP1	0.0695175	0.101664	0.666	0.645
MECP2	PTPN11	0.0727825	0.104115	0.285	0.234
MECP2	MEIS3	0.074455	0.10737	0.351	0.3
MECP2	PPP1CB	0.0945866	0.106652	0.364	0.308
MECP2	TMSB15A	0.0971835	-0.124087	0.311	0.352
MECP2	PCF11	0.106084	0.116287	0.222	0.183
MECP2	PMEL	0.11494	0.1196	0.454	0.414
MECP2	NDUFC1	0.122337	-0.12267	0.57	0.608
MECP2	KCNQ1OT1	0.124428	-0.115888	0.593	0.608
MECP2	EMC6	0.128908	0.105981	0.636	0.621
MECP2	MYDGF	0.134663	0.103845	0.46	0.43
MECP2	BAZ2A	0.138872	0.100484	0.43	0.408
MECP2	TMA16	0.154876	0.107699	0.318	0.278
MECP2	PRRC2B	0.183014	0.100678	0.493	0.473
MECP2	PAK1	0.188434	0.10365	0.291	0.26
MECP2	PCP4	0.312972	-0.149347	0.109	0.134
Knockdown	Gene	p_val	avg_logFC	pct.1	pct.2
HDAC5	HDAC5-G2-gene	4.84237e-18	0.239991	0.135	0.002
HDAC5	HDAC5	1.30812e-10	-0.217253	0.08	0.24
HDAC5	SMC5	0.000183347	0.119539	0.223	0.13
HDAC5	MAST1	0.000340996	0.113836	0.293	0.192
HDAC5	ARHGEF7	0.000395891	-0.13979	0.273	0.37
HDAC5	CCDC25	0.0005088	0.149495	0.619	0.495
HDAC5	FNBP4	0.000683696	0.138607	0.321	0.223
HDAC5	NDUFS4	0.000951676	-0.127113	0.782	0.81
HDAC5	FKBP8	0.00197759	0.1174	0.602	0.533
HDAC5	PTH2	0.00203562	0.200042	0.687	0.623
HDAC5	SLK	0.00231293	0.106509	0.303	0.216
HDAC5	SOGA1	0.00270252	0.127785	0.283	0.207
HDAC5	B4GALT5	0.00340523	-0.121159	0.183	0.256
HDAC5	MEA1	0.0036569	0.106933	0.486	0.39
HDAC5	KDM1A	0.00397422	0.111298	0.637	0.54
HDAC5	C17orf89	0.00436643	-0.137961	0.306	0.374
HDAC5	KIF1B	0.00440873	0.116183	0.556	0.482
HDAC5	ASIC4	0.00494226	-0.100326	0.381	0.469
HDAC5	BCHE	0.00498309	0.118132	0.383	0.299
HDAC5	NIT2	0.00528795	0.109868	0.208	0.143
HDAC5	RAB18	0.006461	-0.100927	0.216	0.289
HDAC5	DACH1	0.00693384	-0.116587	0.511	0.581
HDAC5	CTCF	0.00740608	-0.101673	0.135	0.201
HDAC5	SH3PXD2A	0.00876162	-0.130575	0.201	0.273
HDAC5	CMIP	0.0093437	-0.109799	0.303	0.377
HDAC5	ZNF83	0.00964146	-0.114108	0.479	0.553
HDAC5	WBP5	0.00999475	-0.119871	0.639	0.7
HDAC5	IDI1	0.0108885	0.125703	0.393	0.321
HDAC5	SEC31A	0.0115501	0.104376	0.301	0.231
HDAC5	MAP4	0.0115726	0.12046	0.529	0.465
HDAC5	NOLC1	0.0116011	0.115131	0.358	0.288
HDAC5	CST3	0.0119617	-0.113575	0.724	0.786
HDAC5	GNG5	0.0123572	0.112623	0.81	0.777
HDAC5	CSNK2B	0.0142238	0.108226	0.672	0.604
HDAC5	XRCC5	0.0142251	0.120898	0.787	0.716
HDAC5	ITGB1BP1	0.0149101	0.107414	0.461	0.397
HDAC5	RP11-382A20.3	0.0158379	0.101717	0.594	0.515
HDAC5	SOBP	0.0167748	0.124628	0.326	0.262
HDAC5	ZNF581	0.0174287	-0.106111	0.155	0.211
HDAC5	JOSD2	0.0214292	0.103274	0.288	0.229
HDAC5	HNRNPH2	0.0216922	0.11117	0.306	0.247
HDAC5	CDK12	0.024767	0.105499	0.323	0.262
HDAC5	TAOK1	0.0250614	-0.103969	0.368	0.429
HDAC5	FBXW11	0.0271745	-0.114204	0.429	0.489
HDAC5	BRD4	0.0300433	0.108948	0.501	0.438
HDAC5	MRPS36	0.033046	-0.100608	0.682	0.722
HDAC5	AC004540.4	0.0332943	0.107904	0.544	0.485
HDAC5	EBNA1BP2	0.0356727	-0.102735	0.331	0.381
HDAC5	RAB11B	0.0397457	-0.103203	0.546	0.601
HDAC5	ATP1B1	0.0398666	0.119164	0.619	0.581
HDAC5	BCYRN1	0.0500409	-0.133213	0.098	0.139
HDAC5	OLA1	0.0505445	0.101986	0.521	0.487
HDAC5	CIR1	0.0519552	-0.102344	0.554	0.59
HDAC5	SLC17A7	0.056884	-0.111212	0.406	0.456
HDAC5	BCAR1	0.0695028	0.106392	0.363	0.313
HDAC5	CCDC88A	0.0756905	-0.113474	0.464	0.504
HDAC5	BRD8	0.108512	0.119167	0.383	0.353
HDAC5	CALD1	0.117282	0.103125	0.639	0.619
HDAC5	SOX11	0.121618	0.126293	0.925	0.929
HDAC5	PNPLA8	0.150794	-0.100084	0.298	0.333
Knockdown	Gene	p_val	avg_logFC	pct.1	pct.2
DYRK1A	DYRK1A-G1-gene	4.38392e-22	0.279288	0.159	0
DYRK1A	RNF181	2.27164e-05	0.141632	0.711	0.593
DYRK1A	UBE2V2	6.48743e-05	-0.156725	0.426	0.537
DYRK1A	STYXL1	0.000503546	0.104918	0.312	0.212
DYRK1A	ZSCAN9	0.000506359	-0.10631	0.108	0.187
DYRK1A	TIMMDC1	0.00115785	-0.125633	0.289	0.381
DYRK1A	CACUL1	0.00148818	-0.137159	0.274	0.357
DYRK1A	GDAP1L1	0.00272321	-0.11893	0.489	0.584
DYRK1A	EBF3	0.00322031	0.138231	0.661	0.582
DYRK1A	EIF3K	0.00326648	-0.113343	0.825	0.863
DYRK1A	NISCH	0.00382868	-0.106724	0.249	0.335
DYRK1A	PUM2	0.0042315	-0.100321	0.155	0.227
DYRK1A	CSNK2B	0.00635722	0.112887	0.684	0.604
DYRK1A	TRAPPC6A	0.00695159	-0.107135	0.496	0.599
DYRK1A	C1orf43	0.00738045	-0.100764	0.415	0.5
DYRK1A	RAB31	0.00761875	-0.110387	0.729	0.817
DYRK1A	PHF14	0.00908078	0.122347	0.744	0.72
DYRK1A	USP10	0.00932749	0.107031	0.296	0.231
DYRK1A	GPR161	0.0107995	-0.115401	0.193	0.255
DYRK1A	ITGAE	0.0121732	-0.110146	0.561	0.641
DYRK1A	OTUB1	0.0126037	0.10903	0.511	0.456
DYRK1A	MORN2	0.013343	-0.111173	0.276	0.339
DYRK1A	DPF3	0.0148978	-0.102135	0.193	0.26
DYRK1A	TRIM28	0.0159225	0.104022	0.372	0.306
DYRK1A	TIMP2	0.0159778	0.13759	0.581	0.531
DYRK1A	UBE2G2	0.017196	-0.101567	0.325	0.396
DYRK1A	GNAQ	0.0196478	-0.129128	0.478	0.553
DYRK1A	WDR60	0.0203458	0.119329	0.413	0.353
DYRK1A	HTATSF1	0.0209186	0.105634	0.464	0.403
DYRK1A	NXN	0.0209597	0.104106	0.345	0.288
DYRK1A	SCOC	0.0230008	0.108138	0.464	0.408
DYRK1A	EIF4EBP2	0.0243138	0.108594	0.525	0.469
DYRK1A	ARHGAP21	0.02571	-0.10571	0.276	0.337
DYRK1A	CDC123	0.0268444	0.109218	0.419	0.375
DYRK1A	PDCD11	0.0280448	0.107162	0.388	0.339
DYRK1A	FAM133B	0.0284699	0.105194	0.576	0.533
DYRK1A	GNG5	0.0292077	0.112251	0.83	0.777
DYRK1A	NEUROD1	0.0344481	0.104556	0.933	0.925
DYRK1A	IDI1	0.0361611	0.100944	0.374	0.321
DYRK1A	RNF219	0.0375023	0.109011	0.294	0.244
DYRK1A	UG0898H09	0.0427625	-0.120539	0.312	0.364
DYRK1A	NCOR1	0.0449996	0.104436	0.655	0.619
DYRK1A	DNAJC19	0.046273	0.135725	0.511	0.482
DYRK1A	DPYSL5	0.0490372	0.102227	0.417	0.379
DYRK1A	MRPL1	0.0529231	0.10433	0.451	0.401
DYRK1A	DUOX1	0.0531413	0.12349	0.471	0.421
DYRK1A	PNPLA8	0.0610244	-0.10066	0.283	0.333
DYRK1A	SRSF7	0.067314	0.102283	0.632	0.614
DYRK1A	ZBED5	0.0759083	0.111222	0.312	0.275
DYRK1A	SOX11	0.142961	0.125079	0.928	0.929
DYRK1A	PTPRS	0.155962	0.161535	0.583	0.56
DYRK1A	HNRNPL	0.184373	0.120985	0.336	0.315
DYRK1A	SUPT6H	0.215972	0.105929	0.381	0.364
DYRK1A	PCP4	0.229533	-0.161717	0.11	0.134
DYRK1A	CTNNB1	0.468048	0.231082	0.583	0.588
